# Supplementary material for: Deciphering D4Z4 CpG methylation gradients in fascioscapulohumeral muscular dystrophy using nanopore sequencing
Source: HighWire-hosted journal article supplement (doi:10.1101/gr.277871.123), 2023-09-01
Supplement: Supplemental_Tables.xlsx [file Supplemental_Tables.xlsx]

## Sheet: Index
Index of supplemental tables
Supplemental Table S1	Clinical information and prior genetic testing and genetic results from this study.
Supplemental Table S2	Full read depth and targeting efficiency from nanopore Cas9 targeted sequencing in FSHD1 and FSHD2 participants and healthy controls.
Supplemental Table S3	Composite LSAU-BSAT regions in the T2T CHM13v2.0 reference genome screened for near-target reads.
Supplemental Table S4	D4Z4-pLAM paralogs found in the T2T CHM13v2.0/hs1 reference human genome.
Supplemental Table S5	DUX4 ORF paralogs found in the T2T CHM13v2.0/hs1 reference human genome.
Supplemental Table S6	CpG density greater than 5% in 33 kb sliding windows (step size = 3.3 kb) across the T2T CHM13 v2.0 reference genome.
Supplemental Table S7	Cas9 guide RNA sequences used in this study.
Supplemental Table S8	Sample information for Sequence Read Archive; Bioproject number: PRJNA940957.

## Sheet: Table_S1
Supplemental Table S1. Clinical information and prior genetic testing and genetic results from this study.
Subject ID	Sex	Phenotype	Family History	Summary of prior genetic testing	4q D4Z4 length (this study)	10q D4Z4 length (this study)
P1	Female	Typical FSHD	Yes; multigenerational	4qA 20kb, 42kb 4qB	4qA 5U; 4qB 11 U	10q 10U; 10q 12U
P2	Male	Typical FSHD	Yes; multigenerational	4qA/4qA; methylation 17.85%	4qA 5U; 4qA >13U	10q 12U; 10q >13U
P3	Male	Typical FSHD	Yes; multigenerational	4qA 23kb with methylation on distal D4Z4 20%	4qA 5U; 4qA >19U	10q 8U; 10q >12U
P4	Male	Typical FSHD	Yes; multigenerational	4qA, methylation 15.2%	4qA 5U; 4qA >10U	10q 12U; 10q 18U
P5	Male	Typical FSHD	No	1)"inconclusive" 2004; 2) >40kb, 33kb; 3) 4qA 30kb/4qA 30kb	4qAS 8U; 4qAL 8U	10q >18U
P6	Male	Childhood onset FSHD	Yes; multigenerational	nd	4qA 2U; 4qB >13U	10q 12U; 10q >13U
P7	Female	Typical FSHD	Yes; sibling	SMCHD1 c.1302_1306del, p.Tyr434*, het; 4q D4Z4 >54kb;	4qA 18U; 4qA >20U	10q 7U; 10q 11U
P8	Male	Typical FSHD	Yes; sibling	SMCHD1 c.823_825del, p.p.Lys275del, het	4qA 15U; 4qA 25U	10q 9U; 10q 24U
P9	Male	Typical FSHD	Yes; multigenerational	4q 23kb by Southern blot	4qA 5U; 4qA >10U	10q 12U; 10q >13U
P10	Male	Typical FSHD	Yes; multigenerational	4q 23kb by Southern blot	4qA 5U; 4qA >10U	10q 12U; 10q >21U
C1	Female	Unaffected	nd	nd	4qA>10U; 4qB >10U	10q >10U
C2	Male	Unaffected	nd	nd	4qA>10U; 4qB >10U	10q >10U
C3	Male	Unaffected	nd	nd	4qA >10U	10q >10U
C4	Male	Unaffected	nd	nd	4qA 42U; 4qB 16U	10q 20U; 10q 21U
nd-not done

## Sheet: Table_S2
Supplemental Table S2: Full read depth and targeting efficiency from nanopore Cas9 targeted sequencing in FSHD1 and FSHD2 participants and healthy controls
Subject ID	Total Mapped reads	Yield [Gb]	Median length (bp)	N50	Max. length (bp)	On-target reads	Near-target (divergent D4Z4) reads	4q: p13 reads	4q: pLAM reads	4q: full-length reads(D4Z4 units )	10q: p13 reads	10q: pLAM reads	10q: full-length reads(D4Z4 units )	D4Z4 divergent reads	3.3 kb D4Z4 reads (4q)	3.3 kb D4Z4 reads (10q)	Library	Flow Cell
P1	35019	0.41	7656	17905	160181	0.0111939	0.467403	91	78	68 (5U)	109	114	72 (3:10U, 34:12U)	16368	-	-	Cas9 gRNA:p13E-11+pLAM	MinION R9.4.1
P2	30954	0.21	5143.5	11274	76924	0.00668734	0.569587	64	70	39 (5U)	35	38	5 (12U)	17631	-	-	Cas9 gRNA:p13E-11+pLAM	MinION R9.4.1
P3	116981	1.16	6956	15355	99181	0.00524017	0.366598	137	183	78 (5U)	143	150	36 (8 U)	42885	-	-	Cas9 gRNA:p13E-11+pLAM	MinION R9.4.1
P4	77047	0.72	6801	14691	94320	0.00414033	0.306358	83	107	50 (5U)	59	70	8 (7:12U, 1:18U)	23604	-	-	Cas9 gRNA:p13E-11+pLAM	MinION R9.4.1
P5	18256	0.21	7773	17892	113989	0.009805	0.459082	62	36	25 (15:8U-S, 10:8U-L)	56	25	0	8381	-	-	Cas9 gRNA:p13E-11+pLAM	MinION R9.4.1
P6	27317	0.18	4441	11264	72985	0.00508841	0.331076	48	54	36 (2U)	14	23	1 (12U)	9044	-	-	Cas9 gRNA:p13E-11+pLAM	MinION R9.4.1
P7	53538	0.43	3138.5	20394	133775	0.00719115	0.253708	30	34	4 (18U)	171	150	97 (63:7U, 34:11U)	13583	-	-	Cas9 gRNA:p13E-11+pLAM	MinION R9.4.1
P8	52066	0.59	7779	18799	113679	0.00487842	0.385914	33	42	12 (10:16U, 1:25U)	87	92	40 (39:9U, 1:24U)	20093	-	-	Cas9 gRNA:p13E-11+pLAM	MinION R9.4.1
P2	30734	0.16	1918	13952	100123	0.00250537	0.00136656	27	0	0	50	0	0	42	-	-	Cas9 gRNA:p13E-11+pLAM	MinION R9.4.1
C1	9042	0.06	3313	10884	91685	0.303141	0.0566246	-	-	-	-	-	-	512	1077	1664	Cas9 gRNA:D4Z4	Flongle R9.4.1
C2	10345	0.06	3259	14771	108354	0.246979	0.0310295	-	-	-	-	-	-	321	1424	1131	Cas9 gRNA:D4Z4	Flongle R9.4.1
P9	6431	0.03	3198	9827	57529	0.0637537	0.0214586	-	-	-	-	-	-	138	217	193	Cas9 gRNA:D4Z4	Flongle R9.4.1
P10	1418	0.01	3256.5	6440	55090	0.335684	0.0465444	-	-	-	-	-	-	66	258	218	Cas9 gRNA:D4Z4	Flongle R9.4.1
P1	6977	0.04	3299	10423	69795	0.118389	0.0352587	-	-	-	-	-	-	246	372	454	Cas9 gRNA:D4Z4	Flongle R9.4.1
P1	3348	0.02	3286	10733	78797	0.101254	0.0349462	-	-	-	-	-	-	117	162	177	Cas9 gRNA:D4Z4	Flongle R9.4.1
P9	116799	0.81	4687	11455	79217	0.46%/2.6%	0.320782	115	210	40 (5U)	107	109	0	37467	1524	1517	Cas9 gRNA:p13E-11+pLAM+D4Z4	MinION R9.4.1
P10	39605	0.39	6602	15220	100586	0.65%/4.3%	0.405302	63	91	42 (5U)	55	50	8 (12:U)	16052	888	832	Cas9 gRNA:p13E-11+pLAM+D4Z4	MinION R9.4.1
C3	9952	0.05	3331	8190	55700	0.22%/12.0%	0.417	3	10	0	5	4	0	4152	806	391	Cas9 gRNA:p13E-11+pLAM+D4Z4	MinION R10.4.1
C4	6140482	199.68	17607	64673	2297266	0.0036%/0.037%	-	74	51	18(14:16U, 4:42U)	62	66	15 (10:20U, 5:21U)	-	1212	1071	Ultra -Long kit V14	PromethION 10.4.1

## Sheet: Table_S3
Supplemental Table S3: Composite LSAU-BSAT regions in the T2T CHM13v2.0 reference genome screened for near-target reads
Chromosome	start	end	size (bp.)
Chr 1	128100000	128595000	495001
Chr 3	95356101	95389510	33410
Chr 5	49998881	50018881	20001
Chr 9	48813798	48833798	20001
Chr 10	42519027	42553295	34269
Chr 13	4962951	4997317	34367
Chr 13	9618791	9805639	186849
Chr 14	814216	1337188	522973
Chr 14	3093476	3280671	187196
Chr 14	4076040	4344710	268671
Chr 15	936801	1558053	621253
Chr 15	4978238	5161073	182836
Chr 18	255159	275159	20001
Chr 21	511557	571695	60139
Chr 21	955015	1124635	169621
Chr 21	1942873	1977239	34367
Chr 22	1884590	2395279	510690
Chr 22	3492463	3526831	34369
Chr 22	6002655	6246532	243878
Chr 22	9357441	9690282	332842

## Sheet: Table_S4
Supplemental Table S4: D4Z4-pLAM paralogs found in the T2T CHM13v2.0/hs1 reference human genome.
4 kb D4Z4-pLAM_query: chr4:193539784-193543783
format of the LASTZ command: lastz T2T_CHM13v20_chromosome.faa chr4:193539784-193543783.fasta ‑‑format=general:name1,zstart1,end1,strand1,name2,zstart2+,end2+,strand2,score,nmatch --filter=coverage:25 --filter=identity:80
1 kb D4Z4-pLAM query: chr4:193542784-193543783
format of the LASTZ command: lastz T2T_CHM13v20_chromosome.faa chr4:193542784-193543783 ‑‑format=general:name1,zstart1,end1,strand1,name2,zstart2+,end2+,strand2,score,nmatch --filter=coverage:10 --filter=identity:80
Chromosome	start	end	strand	D4Z4-pLAM_query	q_start	q_end	strand	lastz score	nmatch	Class
Chr1	128098612	128100477	+	chr4:193539784-193543783	947	2869	-	134013	1612	TRUNCATED_3'_fragment
Chr1	128105551	128109454	+	chr4:193539784-193543783	31	4000	-	293572	3446	FULL
Chr1	128109143	128109492	+	chr4:193542784-193543783	275	640	-	22133	290	TRUNCATED_5'_3'_fragment
Chr1	128109442	128110666	+	chr4:193539784-193543783	1665	2895	-	96312	1091	TRUNCATED_5'_3'_fragment
Chr1	128118535	128119808	+	chr4:193539784-193543783	2710	4000	-	85627	1074	TRUNCATED_5'_fragment
Chr1	128120570	128123544	+	chr4:193539784-193543783	955	4000	+	219694	2608	TRUNCATED_5'
Chr 1	128129040	128132032	+	chr4:193539784-193543783	955	4000	+	222121	2637	TRUNCATED_5'
Chr 1	128137596	128140270	+	chr4:193539784-193543783	955	3683	+	203537	2377	TRUNCATED_3'_fragment
Chr 1	128147025	128150006	+	chr4:193539784-193543783	955	4000	-	220671	2632	TRUNCATED_5'
Chr 1	128153314	128156301	+	chr4:193539784-193543783	955	4000	-	222881	2639	TRUNCATED_5'
Chr 1	128179460	128180080	+	chr4:193542784-193543783	404	1000	-	33904	477	TRUNCATED_5'_fragment
Chr 1	128179992	128181783	+	chr4:193539784-193543783	2193	4000	+	130284	1550	TRUNCATED_5'_fragment
Chr 1	128192824	128195806	+	chr4:193539784-193543783	957	4000	+	220731	2621	TRUNCATED_5'
Chr 1	128201651	128204637	+	chr4:193539784-193543783	955	4000	+	222613	2632	TRUNCATED_5'
Chr 1	128208222	128211201	+	chr4:193539784-193543783	955	4000	+	218593	2621	TRUNCATED_5'
Chr 1	128216365	128219340	+	chr4:193539784-193543783	955	4000	+	214380	2587	TRUNCATED_5'
Chr 1	128221606	128224602	+	chr4:193539784-193543783	955	4000	-	218170	2621	TRUNCATED_5'
Chr 1	128228304	128231293	+	chr4:193539784-193543783	955	4000	-	221784	2624	TRUNCATED_5'
Chr 1	128238332	128241321	+	chr4:193539784-193543783	955	4000	-	221915	2625	TRUNCATED_5'
Chr 1	128248355	128251343	+	chr4:193539784-193543783	955	4000	-	217197	2606	TRUNCATED_5'
Chr 1	128254188	128257178	+	chr4:193539784-193543783	955	4000	-	222650	2626	TRUNCATED_5'
Chr 1	128260459	128263455	+	chr4:193539784-193543783	955	4000	-	221374	2623	TRUNCATED_5'
Chr 1	128267155	128269921	+	chr4:193539784-193543783	1243	4000	-	193891	2356	TRUNCATED_5'_fragment
Chr 1	128274929	128276166	+	chr4:193539784-193543783	947	2224	-	90300	1094	TRUNCATED_3'_fragment
Chr 1	128287192	128290179	+	chr4:193539784-193543783	957	3998	-	220605	2617	TRUNCATED_5'
Chr 1	128298343	128301348	+	chr4:193539784-193543783	947	3998	-	219276	2618	TRUNCATED_5'
Chr 1	128304053	128307038	+	chr4:193539784-193543783	955	4000	-	217959	2612	TRUNCATED_5'
Chr 1	128313558	128316524	+	chr4:193539784-193543783	955	4000	-	215405	2592	TRUNCATED_5'
Chr 1	128320456	128323447	+	chr4:193539784-193543783	955	4000	-	221013	2627	TRUNCATED_5'
Chr 1	128327427	128330419	+	chr4:193539784-193543783	955	4000	-	222292	2628	TRUNCATED_5'
Chr 1	128342676	128345665	+	chr4:193539784-193543783	955	4000	-	220914	2629	TRUNCATED_5'
Chr 1	128350213	128350752	+	chr4:193542784-193543783	460	1000	-	35165	450	TRUNCATED_5'_fragment
Chr 1	128350745	128352516	+	chr4:193539784-193543783	2193	4000	+	123548	1517	TRUNCATED_5'_fragment
Chr 1	128355684	128358677	+	chr4:193539784-193543783	955	4000	+	224364	2636	TRUNCATED_5'
Chr 1	128360685	128363674	+	chr4:193539784-193543783	955	4000	+	220893	2628	TRUNCATED_5'
Chr 1	128369295	128370627	+	chr4:193539784-193543783	955	2327	+	104012	1195	TRUNCATED_3'_fragment
Chr 1	128370629	128371351	+	chr4:193542784-193543783	273	998	+	45867	595	TRUNCATED_5'_fragment
Chr 1	128380269	128381631	+	chr4:193539784-193543783	955	2359	+	105794	1226	TRUNCATED_3'_fragment
Chr 1	128381616	128384061	+	chr4:193539784-193543783	955	3457	-	188420	2187	TRUNCATED_3'_fragment
Chr 1	128388939	128391931	+	chr4:193539784-193543783	955	4000	-	218137	2614	TRUNCATED_5'
Chr 1	128396954	128399944	+	chr4:193539784-193543783	955	4000	-	220600	2617	TRUNCATED_5'
Chr 1	128405924	128408824	+	chr4:193539784-193543783	955	4000	-	211609	2552	TRUNCATED_5'
Chr 1	128413501	128416483	+	chr4:193539784-193543783	955	4000	-	218200	2602	TRUNCATED_5'
Chr 1	128420822	128423768	+	chr4:193539784-193543783	955	4000	-	215097	2587	TRUNCATED_5'
Chr 1	128434423	128434816	+	chr4:193542784-193543783	608	1000	-	24098	318	TRUNCATED_5'_fragment
Chr 1	128434815	128437814	+	chr4:193539784-193543783	852	3980	+	218986	2640	TRUNCATED_5'
Chr 1	128441278	128444266	+	chr4:193539784-193543783	955	4000	+	220886	2612	TRUNCATED_5'
Chr 1	128448193	128451161	+	chr4:193539784-193543783	957	3998	+	218897	2599	TRUNCATED_5'
Chr 1	128458153	128461144	+	chr4:193539784-193543783	955	4000	+	219663	2617	TRUNCATED_5'
Chr 1	128466186	128467269	+	chr4:193539784-193543783	2908	4000	+	73842	924	TRUNCATED_5'_fragment
Chr 1	128469823	128472809	+	chr4:193539784-193543783	955	3998	+	221552	2631	TRUNCATED_5'
Chr 1	128474598	128477575	+	chr4:193539784-193543783	955	4000	-	220042	2630	TRUNCATED_5'
Chr 1	128487322	128490312	+	chr4:193539784-193543783	955	4000	-	218592	2606	TRUNCATED_5'
Chr 1	128499488	128502508	+	chr4:193539784-193543783	947	4000	-	220169	2628	TRUNCATED_5'
Chr 1	128510882	128513826	+	chr4:193539784-193543783	955	4000	-	214313	2573	TRUNCATED_5'
Chr 1	128521431	128524420	+	chr4:193539784-193543783	955	4000	-	217291	2607	TRUNCATED_5'
Chr 1	128531419	128534413	+	chr4:193539784-193543783	955	4000	-	220988	2623	TRUNCATED_5'
Chr 1	128540248	128540785	+	chr4:193542784-193543783	462	1000	-	33296	440	TRUNCATED_5'_fragment
Chr 1	128540780	128542572	+	chr4:193539784-193543783	2193	4000	+	120603	1503	TRUNCATED_5'_fragment
Chr 1	128544447	128547363	+	chr4:193539784-193543783	955	3980	+	209178	2545	TRUNCATED_5'
Chr 1	128550620	128553607	+	chr4:193539784-193543783	955	4000	+	221687	2630	TRUNCATED_5'
Chr 1	128555748	128558737	+	chr4:193539784-193543783	955	4000	-	219423	2627	TRUNCATED_5'
Chr 1	128566771	128569764	+	chr4:193539784-193543783	955	4000	+	219536	2632	TRUNCATED_5'
Chr 1	128571641	128574636	+	chr4:193539784-193543783	955	3999	+	216218	2593	TRUNCATED_5'
Chr 1	128582246	128585190	+	chr4:193539784-193543783	955	4000	+	212624	2575	TRUNCATED_5'
Chr 1	128588150	128591145	+	chr4:193539784-193543783	946	4000	+	227600	2663	TRUNCATED_5'
Chr 3	75720817	75723858	+	chr4:193539784-193543783	387	3638	+	169695	2425	TRUNCATED_FULL
Chr 3	95366300	95366950	+	chr4:193542784-193543783	348	1000	+	42322	537	TRUNCATED_5'_fragment
Chr 3	95377427	95380420	+	chr4:193539784-193543783	955	4000	+	227549	2659	TRUNCATED_5'
Chr 3	95386966	95388296	+	chr4:193539784-193543783	955	2325	+	102107	1196	TRUNCATED_3'_fragment
Chr 4	193389138	193392156	+	chr4:193539784-193543783	387	3638	-	183262	2489	TRUNCATED_FULL
Chr 4	193433357	193434607	+	chr4:193539784-193543783	2384	3640	+	118919	1235	TRUNCATED_5'_3'_fragment
Chr 4	193434262	193437904	+	chr4:193539784-193543783	0	3640	+	351971	3625	TRUNCATED_3'
Chr 4	193437559	193441200	+	chr4:193539784-193543783	0	3640	+	349719	3617	TRUNCATED_3'
Chr 4	193440855	193444497	+	chr4:193539784-193543783	0	3640	+	349475	3616	TRUNCATED_3'
Chr 4	193444152	193447793	+	chr4:193539784-193543783	0	3640	+	349597	3616	TRUNCATED_3'
Chr 4	193447448	193451089	+	chr4:193539784-193543783	0	3640	+	349944	3618	TRUNCATED_3'
Chr 4	193450744	193454385	+	chr4:193539784-193543783	0	3640	+	349739	3617	TRUNCATED_3'
Chr 4	193454040	193457690	+	chr4:193539784-193543783	0	3640	+	348927	3616	TRUNCATED_3'
Chr 4	193457345	193460984	+	chr4:193539784-193543783	0	3640	+	350609	3619	TRUNCATED_3'
Chr 4	193460639	193464282	+	chr4:193539784-193543783	0	3640	+	351315	3622	TRUNCATED_3'
Chr 4	193463937	193467578	+	chr4:193539784-193543783	0	3640	+	349514	3616	TRUNCATED_3'
Chr 4	193467233	193470881	+	chr4:193539784-193543783	0	3640	+	348782	3615	TRUNCATED_3'
Chr 4	193470536	193474177	+	chr4:193539784-193543783	0	3640	+	349597	3616	TRUNCATED_3'
Chr 4	193473832	193477472	+	chr4:193539784-193543783	0	3640	+	349618	3616	TRUNCATED_3'
Chr 4	193477127	193480769	+	chr4:193539784-193543783	0	3640	+	349803	3617	TRUNCATED_3'
Chr 4	193480424	193484062	+	chr4:193539784-193543783	0	3640	+	351089	3621	TRUNCATED_3'
Chr 4	193483717	193487361	+	chr4:193539784-193543783	0	3640	+	349948	3618	TRUNCATED_3'
Chr 4	193487016	193490659	+	chr4:193539784-193543783	0	3640	+	351756	3624	TRUNCATED_3'
Chr 4	193490314	193493959	+	chr4:193539784-193543783	0	3640	+	349928	3619	TRUNCATED_3'
Chr 4	193493614	193497259	+	chr4:193539784-193543783	0	3640	+	350283	3619	TRUNCATED_3'
Chr 4	193496914	193500556	+	chr4:193539784-193543783	0	3640	+	349567	3616	TRUNCATED_3'
Chr 4	193500211	193503854	+	chr4:193539784-193543783	0	3640	+	352092	3626	TRUNCATED_3'
Chr 4	193503509	193507150	+	chr4:193539784-193543783	0	3640	+	352929	3630	TRUNCATED_3'
Chr 4	193506805	193510447	+	chr4:193539784-193543783	0	3640	+	352469	3628	TRUNCATED_3'
Chr 4	193510102	193513744	+	chr4:193539784-193543783	0	3640	+	350130	3619	TRUNCATED_3'
Chr 4	193513399	193517042	+	chr4:193539784-193543783	0	3640	+	352092	3626	TRUNCATED_3'
Chr 4	193516697	193520340	+	chr4:193539784-193543783	0	3640	+	352092	3626	TRUNCATED_3'
Chr 4	193519995	193523636	+	chr4:193539784-193543783	0	3640	+	349944	3618	TRUNCATED_3'
Chr 4	193523291	193526933	+	chr4:193539784-193543783	0	3640	+	349475	3616	TRUNCATED_3'
Chr 4	193526588	193530229	+	chr4:193539784-193543783	0	3640	+	349597	3616	TRUNCATED_3'
Chr 4	193529884	193533526	+	chr4:193539784-193543783	0	3640	+	349914	3618	TRUNCATED_3'
Chr 4	193533181	193536822	+	chr4:193539784-193543783	0	3640	+	349739	3617	TRUNCATED_3'
Chr 4	193536477	193540128	+	chr4:193539784-193543783	0	3640	+	349347	3618	TRUNCATED_3'
Chr 4	193539783	193543783	+	chr4:193539784-193543783	0	4000	+	389470	4000	FULL
Chr 5	50006838	50009790	+	chr4:193539784-193543783	955	4000	+	211502	2556	TRUNCATED_5'
Chr 9	48821721	48824705	+	chr4:193539784-193543783	955	4000	+	213518	2586	TRUNCATED_5'
Chr 10	42529110	42532105	+	chr4:193539784-193543783	946	4000	-	226251	2654	TRUNCATED_5'
Chr 10	42534960	42537949	+	chr4:193539784-193543783	955	4000	-	222180	2628	TRUNCATED_5'
Chr 10	42543378	42546361	+	chr4:193539784-193543783	955	4000	-	217211	2601	TRUNCATED_5'
Chr 10	134615846	134617096	+	chr4:193539784-193543783	2384	3640	+	118797	1234	TRUNCATED_5'_3'_fragment
Chr 10	134616751	134620403	+	chr4:193539784-193543783	0	3640	+	346270	3601	TRUNCATED_3'
Chr 10	134620058	134623710	+	chr4:193539784-193543783	0	3640	+	346270	3601	TRUNCATED_3'
Chr 10	134623365	134627017	+	chr4:193539784-193543783	0	3640	+	345700	3598	TRUNCATED_3'
Chr 10	134626672	134630327	+	chr4:193539784-193543783	0	3640	+	345610	3598	TRUNCATED_3'
Chr 10	134629982	134633637	+	chr4:193539784-193543783	0	3640	+	345741	3599	TRUNCATED_3'
Chr 10	134633292	134636947	+	chr4:193539784-193543783	0	3640	+	345741	3599	TRUNCATED_3'
Chr 10	134636602	134640257	+	chr4:193539784-193543783	0	3640	+	346180	3601	TRUNCATED_3'
Chr 10	134639912	134643567	+	chr4:193539784-193543783	0	3640	+	345955	3600	TRUNCATED_3'
Chr 10	134643222	134646877	+	chr4:193539784-193543783	0	3640	+	345599	3598	TRUNCATED_3'
Chr 10	134646532	134650187	+	chr4:193539784-193543783	0	3640	+	345824	3599	TRUNCATED_3'
Chr 10	134649842	134653497	+	chr4:193539784-193543783	0	3640	+	346180	3601	TRUNCATED_3'
Chr 10	134653152	134656807	+	chr4:193539784-193543783	0	3640	+	345741	3599	TRUNCATED_3'
Chr 10	134656462	134660117	+	chr4:193539784-193543783	0	3640	+	345741	3599	TRUNCATED_3'
Chr 10	134659772	134663427	+	chr4:193539784-193543783	0	3640	+	345955	3600	TRUNCATED_3'
Chr 10	134663082	134666737	+	chr4:193539784-193543783	0	3640	+	345599	3598	TRUNCATED_3'
Chr 10	134666392	134670047	+	chr4:193539784-193543783	0	3640	+	345824	3599	TRUNCATED_3'
Chr 10	134669702	134673355	+	chr4:193539784-193543783	0	3640	+	343200	3597	TRUNCATED_3'
Chr 10	134673011	134676663	+	chr4:193539784-193543783	0	3640	+	339483	3590	TRUNCATED_3'
Chr 10	134676318	134679974	+	chr4:193539784-193543783	0	3640	+	345311	3599	TRUNCATED_3'
Chr 10	134679629	134683294	+	chr4:193539784-193543783	0	3640	+	340991	3597	TRUNCATED_3'
Chr 10	134682947	134686617	+	chr4:193539784-193543783	0	3640	+	336488	3592	TRUNCATED_3'
Chr 10	134686270	134689933	+	chr4:193539784-193543783	0	3640	+	337832	3591	TRUNCATED_3'
Chr 10	134689588	134693243	+	chr4:193539784-193543783	0	3640	+	343700	3598	TRUNCATED_3'
Chr 10	134692898	134696555	+	chr4:193539784-193543783	0	3640	+	345495	3600	TRUNCATED_3'
Chr 10	134696210	134699866	+	chr4:193539784-193543783	0	3640	+	345169	3598	TRUNCATED_3'
Chr 10	134699521	134703176	+	chr4:193539784-193543783	0	3640	+	345824	3599	TRUNCATED_3'
Chr 10	134702831	134706486	+	chr4:193539784-193543783	0	3640	+	346049	3600	TRUNCATED_3'
Chr 10	134706141	134709796	+	chr4:193539784-193543783	0	3640	+	345479	3597	TRUNCATED_3'
Chr 10	134709451	134713106	+	chr4:193539784-193543783	0	3640	+	344815	3594	TRUNCATED_3'
Chr 10	134712761	134716416	+	chr4:193539784-193543783	0	3640	+	345610	3598	TRUNCATED_3'
Chr 10	134716071	134719726	+	chr4:193539784-193543783	0	3640	+	345610	3598	TRUNCATED_3'
Chr 10	134719381	134723036	+	chr4:193539784-193543783	0	3640	+	345385	3597	TRUNCATED_3'
Chr 10	134722691	134726706	+	chr4:193539784-193543783	0	4000	+	379392	3956	FULL
Chr 13	4973150	4973800	+	chr4:193542784-193543783	348	1000	+	42333	537	TRUNCATED_5'_fragment
Chr 13	4985234	4988227	+	chr4:193539784-193543783	955	4000	+	227008	2656	TRUNCATED_5'
Chr 13	4994773	4996103	+	chr4:193539784-193543783	955	2325	+	101223	1191	TRUNCATED_3'_fragment
Chr 13	9628874	9631865	+	chr4:193539784-193543783	955	4000	-	223412	2637	TRUNCATED_5'
Chr 13	9634843	9637845	+	chr4:193539784-193543783	946	4000	-	224854	2649	TRUNCATED_5'
Chr 13	9643679	9646596	+	chr4:193539784-193543783	955	4000	-	215222	2584	TRUNCATED_5'
Chr 13	9650929	9653883	+	chr4:193539784-193543783	955	4000	-	216353	2596	TRUNCATED_5'
Chr 13	9658708	9661599	+	chr4:193539784-193543783	955	4000	-	212908	2552	TRUNCATED_5'
Chr 13	9663438	9665259	+	chr4:193539784-193543783	2050	3996	+	101848	1470	TRUNCATED_5'_fragment
Chr 13	9668854	9671852	+	chr4:193539784-193543783	955	4000	+	221714	2637	TRUNCATED_5'
Chr 13	9678372	9681284	+	chr4:193539784-193543783	955	4000	+	212655	2565	TRUNCATED_5'
Chr 13	9688200	9691181	+	chr4:193539784-193543783	957	4000	-	218501	2616	TRUNCATED_5'
Chr 13	9695376	9695997	+	chr4:193542784-193543783	404	1000	-	35554	491	TRUNCATED_5'_fragment
Chr 13	9695909	9697618	+	chr4:193539784-193543783	2193	4000	+	109378	1434	TRUNCATED_5'_fragment
Chr 13	9699556	9702514	+	chr4:193539784-193543783	955	4000	-	220441	2624	TRUNCATED_5'
Chr 13	9706894	9708958	+	chr4:193539784-193543783	0	2116	-	157723	1841	5'_fragment
Chr 13	9708617	9711031	+	chr4:193539784-193543783	957	3640	-	178844	2156	TRUNCATED_3'_fragment
Chr 13	9715441	9718443	+	chr4:193539784-193543783	957	4000	-	225424	2648	TRUNCATED_5'
Chr 13	9722921	9724003	+	chr4:193539784-193543783	2908	4000	-	76803	938	TRUNCATED_5'_fragment
Chr 13	9728366	9731285	+	chr4:193539784-193543783	955	4000	-	213253	2580	TRUNCATED_5'
Chr 13	9735969	9737767	+	chr4:193539784-193543783	2189	4000	-	130274	1562	TRUNCATED_5'_fragment
Chr 13	9740193	9743186	+	chr4:193539784-193543783	955	4000	+	222883	2632	TRUNCATED_5'
Chr 13	9745415	9748404	+	chr4:193539784-193543783	955	4000	+	221905	2639	TRUNCATED_5'
Chr 13	9750616	9753587	+	chr4:193539784-193543783	955	4000	-	220234	2620	TRUNCATED_5'
Chr 13	9756583	9759499	+	chr4:193539784-193543783	955	3980	-	214015	2570	TRUNCATED_5'
Chr 13	9765952	9769237	+	chr4:193539784-193543783	653	4000	-	245516	2903	TRUNCATED_5'
Chr 13	9777801	9780793	+	chr4:193539784-193543783	955	4000	-	223925	2653	TRUNCATED_5'
Chr 13	9785926	9788922	+	chr4:193539784-193543783	955	4000	-	224817	2649	TRUNCATED_5'
Chr 13	9795722	9796372	+	chr4:193542784-193543783	348	1000	-	40760	531	TRUNCATED_5'_fragment
Chr 13	10737356	10738006	+	chr4:193542784-193543783	348	1000	-	43067	545	TRUNCATED_5'_fragment
Chr 14	824299	827267	+	chr4:193539784-193543783	955	4000	-	216247	2590	TRUNCATED_5'
Chr 14	831442	834431	+	chr4:193539784-193543783	955	4000	-	223312	2637	TRUNCATED_5'
Chr 14	837203	840191	+	chr4:193539784-193543783	955	4000	-	224128	2641	TRUNCATED_5'
Chr 14	845070	848029	+	chr4:193539784-193543783	947	3999	-	221227	2616	TRUNCATED_5'
Chr 14	853169	856157	+	chr4:193539784-193543783	957	3998	-	223180	2633	TRUNCATED_5'
Chr 14	860560	863549	+	chr4:193539784-193543783	955	4000	-	222029	2638	TRUNCATED_5'
Chr 14	873986	875280	+	chr4:193539784-193543783	2660	4000	+	82558	1082	TRUNCATED_5'_fragment
Chr 14	878252	880096	+	chr4:193539784-193543783	957	2869	+	141142	1648	TRUNCATED_3'_fragment
Chr 14	879927	882387	+	chr4:193539784-193543783	955	3459	-	178298	2146	TRUNCATED_3'_fragment
Chr 14	890201	893142	+	chr4:193539784-193543783	955	4000	-	220605	2604	TRUNCATED_5'
Chr 14	902299	905269	+	chr4:193539784-193543783	955	4000	-	219164	2606	TRUNCATED_5'
Chr 14	909267	912245	+	chr4:193539784-193543783	955	4000	-	225413	2648	TRUNCATED_5'
Chr 14	921818	924811	+	chr4:193539784-193543783	955	4000	-	224093	2637	TRUNCATED_5'
Chr 14	933041	934720	+	chr4:193539784-193543783	2352	4000	-	107011	1372	TRUNCATED_5'_fragment
Chr 14	934710	935270	+	chr4:193542784-193543783	435	996	+	35736	462	TRUNCATED_5'_fragment
Chr 14	942017	944980	+	chr4:193539784-193543783	955	4000	+	219668	2619	TRUNCATED_5'
Chr 14	949781	952404	+	chr4:193539784-193543783	955	3638	+	203623	2357	TRUNCATED_3'_fragment
Chr 14	952065	955987	+	chr4:193539784-193543783	0	4000	+	284014	3405	FULL
Chr 14	960261	963187	+	chr4:193539784-193543783	960	3940	+	218172	2573	TRUNCATED_5'
Chr 14	1313020	1313670	+	chr4:193542784-193543783	348	1000	+	41997	535	TRUNCATED_5'_fragment
Chr 14	1325103	1328098	+	chr4:193539784-193543783	955	4000	+	228256	2664	TRUNCATED_5'
Chr 14	1334644	1335974	+	chr4:193539784-193543783	955	2325	+	101987	1195	TRUNCATED_3'_fragment
Chr 14	3103559	3106551	+	chr4:193539784-193543783	955	4000	-	222360	2633	TRUNCATED_5'
Chr 14	3109529	3112532	+	chr4:193539784-193543783	946	4000	-	225863	2658	TRUNCATED_5'
Chr 14	3118366	3121283	+	chr4:193539784-193543783	955	4000	-	215130	2584	TRUNCATED_5'
Chr 14	3125616	3128566	+	chr4:193539784-193543783	955	4000	-	215516	2592	TRUNCATED_5'
Chr 14	3133392	3136283	+	chr4:193539784-193543783	955	4000	-	212515	2549	TRUNCATED_5'
Chr 14	3138122	3139943	+	chr4:193539784-193543783	2050	3996	+	101864	1466	TRUNCATED_5'_fragment
Chr 14	3143538	3146537	+	chr4:193539784-193543783	955	4000	+	221483	2637	TRUNCATED_5'
Chr 14	3153057	3155969	+	chr4:193539784-193543783	955	4000	+	212607	2564	TRUNCATED_5'
Chr 14	3162886	3165867	+	chr4:193539784-193543783	957	4000	-	217872	2612	TRUNCATED_5'
Chr 14	3170062	3170683	+	chr4:193542784-193543783	404	1000	-	35607	489	TRUNCATED_5'_fragment
Chr 14	3170595	3172304	+	chr4:193539784-193543783	2193	4000	+	109531	1435	TRUNCATED_5'_fragment
Chr 14	3174242	3177198	+	chr4:193539784-193543783	957	4000	-	220586	2624	TRUNCATED_5'
Chr 14	3181580	3183644	+	chr4:193539784-193543783	0	2116	-	157535	1839	5'_fragment
Chr 14	3183303	3185717	+	chr4:193539784-193543783	957	3640	-	179787	2162	TRUNCATED_3'_fragment
Chr 14	3190472	3193474	+	chr4:193539784-193543783	957	4000	-	225983	2651	TRUNCATED_5'
Chr 14	3197952	3199034	+	chr4:193539784-193543783	2908	4000	-	77231	940	TRUNCATED_5'_fragment
Chr 14	3203397	3206316	+	chr4:193539784-193543783	955	4000	-	213364	2581	TRUNCATED_5'
Chr 14	3211000	3212798	+	chr4:193539784-193543783	2189	4000	-	130049	1561	TRUNCATED_5'_fragment
Chr 14	3215224	3218217	+	chr4:193539784-193543783	955	4000	+	223573	2636	TRUNCATED_5'
Chr 14	3220446	3223435	+	chr4:193539784-193543783	955	4000	+	221949	2638	TRUNCATED_5'
Chr 14	3225647	3228618	+	chr4:193539784-193543783	955	4000	-	220496	2622	TRUNCATED_5'
Chr 14	3231614	3234531	+	chr4:193539784-193543783	955	3980	-	213857	2569	TRUNCATED_5'
Chr 14	3240984	3244269	+	chr4:193539784-193543783	653	4000	-	245883	2905	TRUNCATED_5'
Chr 14	3252832	3255824	+	chr4:193539784-193543783	955	4000	-	223982	2652	TRUNCATED_5'
Chr 14	3260957	3263953	+	chr4:193539784-193543783	955	4000	-	224950	2650	TRUNCATED_5'
Chr 14	3270754	3271404	+	chr4:193542784-193543783	348	1000	-	40677	531	TRUNCATED_5'_fragment
Chr 14	4085350	4086946	+	chr4:193539784-193543783	2388	4000	+	116003	1390	TRUNCATED_5'_fragment
Chr 14	4091828	4094817	+	chr4:193539784-193543783	957	4000	+	223362	2628	TRUNCATED_5'
Chr 14	4099356	4102017	+	chr4:193539784-193543783	955	4000	+	185624	2334	TRUNCATED_5'
Chr 14	4105175	4107628	+	chr4:193539784-193543783	955	3445	-	187094	2181	TRUNCATED_3'_fragment
Chr 14	4114708	4117705	+	chr4:193539784-193543783	955	4000	-	220706	2623	TRUNCATED_5'
Chr 14	4123112	4126112	+	chr4:193539784-193543783	947	4000	-	219341	2627	TRUNCATED_5'
Chr 14	4131500	4132775	+	chr4:193539784-193543783	2710	3998	-	91592	1108	TRUNCATED_5'_fragment
Chr 14	4133606	4136595	+	chr4:193539784-193543783	955	3998	+	223277	2635	TRUNCATED_5'
Chr 14	4139545	4140366	+	chr4:193542784-193543783	134	1000	+	48702	664	TRUNCATED_5'_fragment
Chr 14	4144272	4147252	+	chr4:193539784-193543783	955	3988	+	220196	2610	TRUNCATED_5'
Chr 14	4147915	4150903	+	chr4:193539784-193543783	955	4000	+	223570	2641	TRUNCATED_5'
Chr 14	4153941	4156912	+	chr4:193539784-193543783	955	3984	+	215740	2588	TRUNCATED_5'
Chr 14	4161270	4164254	+	chr4:193539784-193543783	955	4000	+	217782	2605	TRUNCATED_5'
Chr 14	4172551	4175141	+	chr4:193539784-193543783	955	4000	+	166970	2234	TRUNCATED_5'
Chr 14	4178385	4179748	+	chr4:193539784-193543783	955	2359	+	107355	1229	TRUNCATED_3'_fragment
Chr 14	4179616	4182171	+	chr4:193539784-193543783	955	3590	-	187593	2251	TRUNCATED_3'_fragment
Chr 14	4184256	4186933	+	chr4:193539784-193543783	955	4000	-	187236	2351	TRUNCATED_5'
Chr 14	4191454	4194443	+	chr4:193539784-193543783	955	4000	-	222146	2630	TRUNCATED_5'
Chr 14	4196802	4199629	+	chr4:193539784-193543783	955	4000	-	202572	2464	TRUNCATED_5'
Chr 14	4203676	4205174	+	chr4:193539784-193543783	955	2494	-	115546	1342	TRUNCATED_3'_fragment
Chr 14	4205870	4207145	+	chr4:193539784-193543783	2710	4000	+	86341	1081	TRUNCATED_5'_fragment
Chr 14	4216520	4218129	+	chr4:193539784-193543783	955	2603	+	124252	1433	TRUNCATED_3'_fragment
Chr 14	4220333	4223322	+	chr4:193539784-193543783	955	4000	-	220776	2625	TRUNCATED_5'
Chr 14	4226770	4229761	+	chr4:193539784-193543783	955	4000	-	221665	2636	TRUNCATED_5'
Chr 14	4236210	4239207	+	chr4:193539784-193543783	947	4000	-	219384	2619	TRUNCATED_5'
Chr 14	4255857	4258822	+	chr4:193539784-193543783	955	3999	+	218223	2606	TRUNCATED_5'
Chr 14	4274421	4277400	+	chr4:193539784-193543783	957	4000	+	227268	2659	TRUNCATED_5'
Chr 14	4280221	4283213	+	chr4:193539784-193543783	955	4000	+	223945	2635	TRUNCATED_5'
Chr 14	4291503	4294494	+	chr4:193539784-193543783	955	4000	-	225300	2647	TRUNCATED_5'
Chr 14	4298393	4301342	+	chr4:193539784-193543783	955	4000	-	202697	2526	TRUNCATED_5'
Chr 14	4306577	4309560	+	chr4:193539784-193543783	955	4000	-	217988	2619	TRUNCATED_5'
Chr 14	4318548	4322450	+	chr4:193539784-193543783	0	4000	-	291485	3444	FULL
Chr 14	4322154	4323211	+	chr4:193539784-193543783	2523	3638	-	78986	941	TRUNCATED_5'_3'_fragment
Chr 14	4334787	4338295	+	chr4:193539784-193543783	433	4000	-	267358	3131	TRUNCATED_5'
Chr 14	4374375	4376009	+	chr4:193539784-193543783	1902	3638	+	95772	1317	TRUNCATED_5'_3'_fragment
Chr 14	4986887	4989465	+	chr4:193539784-193543783	1341	4000	+	195119	2292	TRUNCATED_5'_fragment
Chr 14	4995479	4998452	+	chr4:193539784-193543783	947	4000	+	224645	2647	TRUNCATED_5'
Chr 14	5015036	5018023	+	chr4:193539784-193543783	955	4000	+	224182	2641	TRUNCATED_5'
Chr 14	5021877	5024765	+	chr4:193539784-193543783	955	4000	+	209803	2553	TRUNCATED_5'
Chr 14	5030427	5033420	+	chr4:193539784-193543783	955	4000	+	222173	2628	TRUNCATED_5'
Chr 14	5035754	5038736	+	chr4:193539784-193543783	955	4000	-	218650	2621	TRUNCATED_5'
Chr 14	5040953	5043942	+	chr4:193539784-193543783	955	4000	-	224148	2641	TRUNCATED_5'
Chr 14	5050568	5053557	+	chr4:193539784-193543783	955	4000	-	217128	2607	TRUNCATED_5'
Chr 14	5057895	5060885	+	chr4:193539784-193543783	955	4000	-	222608	2630	TRUNCATED_5'
Chr 14	5063961	5066949	+	chr4:193539784-193543783	955	4000	-	219996	2610	TRUNCATED_5'
Chr 14	5070742	5073051	+	chr4:193539784-193543783	1572	4000	-	168672	2033	TRUNCATED_5'_fragment
Chr 14	5072791	5075451	+	chr4:193539784-193543783	955	3797	-	186178	2306	TRUNCATED_3'_fragment
Chr 14	5078693	5081394	+	chr4:193539784-193543783	1243	4000	-	196106	2353	TRUNCATED_5'_fragment
Chr 14	5087157	5088415	+	chr4:193539784-193543783	916	2224	-	92380	1117	TRUNCATED_3'_fragment
Chr 14	5099489	5102478	+	chr4:193539784-193543783	957	4000	-	219581	2617	TRUNCATED_5'
Chr 14	5107429	5110421	+	chr4:193539784-193543783	955	4000	-	220554	2624	TRUNCATED_5'
Chr 14	5114469	5117461	+	chr4:193539784-193543783	955	4000	-	223457	2635	TRUNCATED_5'
Chr 14	5129482	5132468	+	chr4:193539784-193543783	955	4000	-	221158	2634	TRUNCATED_5'
Chr 14	5136192	5136638	+	chr4:193542784-193543783	553	998	-	26536	356	TRUNCATED_5'_fragment
Chr 14	5140635	5143614	+	chr4:193539784-193543783	955	4000	-	219028	2612	TRUNCATED_5'
Chr 14	5146172	5149066	+	chr4:193539784-193543783	955	4000	-	208143	2530	TRUNCATED_5'
Chr 14	5153609	5154149	+	chr4:193542784-193543783	460	1000	-	34903	446	TRUNCATED_5'_fragment
Chr 14	5154087	5155934	+	chr4:193539784-193543783	2150	4000	+	128280	1573	TRUNCATED_5'_fragment
Chr 14	5159170	5162164	+	chr4:193539784-193543783	955	4000	+	223750	2628	TRUNCATED_5'
Chr 14	5164247	5167227	+	chr4:193539784-193543783	955	4000	+	218374	2613	TRUNCATED_5'
Chr 14	5172777	5174109	+	chr4:193539784-193543783	955	2327	+	104280	1200	TRUNCATED_3'_fragment
Chr 14	5174111	5174835	+	chr4:193542784-193543783	273	1000	+	44709	588	TRUNCATED_5'_fragment
Chr 14	5184200	5185563	+	chr4:193539784-193543783	955	2359	+	106496	1226	TRUNCATED_3'_fragment
Chr 14	5185556	5187994	+	chr4:193539784-193543783	955	3445	-	187846	2183	TRUNCATED_3'_fragment
Chr 14	5196845	5199837	+	chr4:193539784-193543783	955	4000	-	219541	2617	TRUNCATED_5'
Chr 14	5204722	5207709	+	chr4:193539784-193543783	955	4000	-	221336	2621	TRUNCATED_5'
Chr 14	5216938	5219915	+	chr4:193539784-193543783	955	4000	+	223165	2647	TRUNCATED_5'
Chr 14	5221704	5224690	+	chr4:193539784-193543783	955	3998	-	225136	2648	TRUNCATED_5'
Chr 14	5226838	5227923	+	chr4:193539784-193543783	2908	4000	-	76192	934	TRUNCATED_5'_fragment
Chr 14	5234176	5237168	+	chr4:193539784-193543783	955	4000	-	221629	2634	TRUNCATED_5'
Chr 14	5240894	5243794	+	chr4:193539784-193543783	955	4000	-	210498	2549	TRUNCATED_5'
Chr 14	5248336	5251325	+	chr4:193539784-193543783	955	4000	-	219858	2612	TRUNCATED_5'
Chr 14	5255661	5258606	+	chr4:193539784-193543783	955	4000	-	214051	2583	TRUNCATED_5'
Chr 14	5270630	5273617	+	chr4:193539784-193543783	955	4000	-	217580	2604	TRUNCATED_5'
Chr 14	5277200	5278990	+	chr4:193539784-193543783	2193	4000	-	126298	1534	TRUNCATED_5'_fragment
Chr 14	5278897	5279523	+	chr4:193542784-193543783	395	1000	+	33825	483	TRUNCATED_5'_fragment
Chr 14	5283111	5286095	+	chr4:193539784-193543783	955	3998	+	222392	2626	TRUNCATED_5'
Chr 14	5291252	5294237	+	chr4:193539784-193543783	957	4000	+	219931	2616	TRUNCATED_5'
Chr 14	5298982	5301967	+	chr4:193539784-193543783	955	4000	+	216297	2598	TRUNCATED_5'
Chr 14	5305012	5308004	+	chr4:193539784-193543783	955	4000	+	221618	2634	TRUNCATED_5'
Chr 14	5314257	5315342	+	chr4:193539784-193543783	2908	4000	+	76181	934	TRUNCATED_5'_fragment
Chr 14	5317491	5320477	+	chr4:193539784-193543783	955	3998	+	225136	2648	TRUNCATED_5'
Chr 14	5322266	5325243	+	chr4:193539784-193543783	955	4000	-	223165	2647	TRUNCATED_5'
Chr 14	5336418	5339411	+	chr4:193539784-193543783	955	4000	-	219838	2612	TRUNCATED_5'
Chr 14	5348590	5351609	+	chr4:193539784-193543783	947	4000	-	220640	2628	TRUNCATED_5'
Chr 14	5359646	5362638	+	chr4:193539784-193543783	955	4000	-	221032	2626	TRUNCATED_5'
Chr 14	5370109	5373098	+	chr4:193539784-193543783	955	4000	-	217457	2615	TRUNCATED_5'
Chr 14	5380015	5383007	+	chr4:193539784-193543783	955	4000	-	221382	2626	TRUNCATED_5'
Chr 14	5387814	5388352	+	chr4:193542784-193543783	462	1000	-	33322	437	TRUNCATED_5'_fragment
Chr 14	5388347	5390134	+	chr4:193539784-193543783	2193	4000	+	124460	1528	TRUNCATED_5'_fragment
Chr 14	5394737	5397654	+	chr4:193539784-193543783	955	3980	+	212435	2566	TRUNCATED_5'
Chr 14	5400910	5403895	+	chr4:193539784-193543783	955	4000	+	223875	2647	TRUNCATED_5'
Chr 14	5406175	5407458	+	chr4:193539784-193543783	2703	4000	-	90886	1112	TRUNCATED_5'_fragment
Chr 14	5415117	5418065	+	chr4:193539784-193543783	955	3984	+	212685	2579	TRUNCATED_5'
Chr 15	934621	937609	+	chr4:193539784-193543783	955	4000	-	182681	2446	TRUNCATED_5'
Chr 15	946884	949852	+	chr4:193539784-193543783	955	4000	-	218992	2605	TRUNCATED_5'
Chr 15	953843	956835	+	chr4:193539784-193543783	955	4000	-	223020	2630	TRUNCATED_5'
Chr 15	959744	962732	+	chr4:193539784-193543783	955	4000	-	224835	2645	TRUNCATED_5'
Chr 15	967614	970559	+	chr4:193539784-193543783	965	3999	-	222180	2615	TRUNCATED_5'
Chr 15	978224	981215	+	chr4:193539784-193543783	957	4000	-	222705	2622	TRUNCATED_5'
Chr 15	986783	989771	+	chr4:193539784-193543783	955	4000	-	222556	2641	TRUNCATED_5'
Chr 15	1000273	1001544	+	chr4:193539784-193543783	2660	4000	+	80503	1065	TRUNCATED_5'_fragment
Chr 15	1004585	1006429	+	chr4:193539784-193543783	957	2869	+	141183	1651	TRUNCATED_3'_fragment
Chr 15	1006260	1008720	+	chr4:193539784-193543783	955	3459	-	178016	2142	TRUNCATED_3'_fragment
Chr 15	1023904	1026872	+	chr4:193539784-193543783	955	3998	-	218260	2605	TRUNCATED_5'
Chr 15	1030802	1033781	+	chr4:193539784-193543783	955	4000	-	225916	2650	TRUNCATED_5'
Chr 15	1042462	1045077	+	chr4:193539784-193543783	955	4000	-	175369	2287	TRUNCATED_5'
Chr 15	1053296	1056290	+	chr4:193539784-193543783	955	4000	-	224395	2640	TRUNCATED_5'
Chr 15	1062414	1064042	+	chr4:193539784-193543783	2352	4000	-	110087	1377	TRUNCATED_5'_fragment
Chr 15	1064032	1064596	+	chr4:193542784-193543783	435	1000	+	35751	464	TRUNCATED_5'_fragment
Chr 15	1071255	1074227	+	chr4:193539784-193543783	955	4000	+	220440	2625	TRUNCATED_5'
Chr 15	1078363	1080992	+	chr4:193539784-193543783	955	3638	+	205823	2365	TRUNCATED_3'_fragment
Chr 15	1080652	1084574	+	chr4:193539784-193543783	0	4000	+	285695	3414	FULL
Chr 15	1093011	1095934	+	chr4:193539784-193543783	960	3940	+	216849	2567	TRUNCATED_5'
Chr 15	1533884	1534534	+	chr4:193542784-193543783	348	1000	+	42333	537	TRUNCATED_5'_fragment
Chr 15	1545968	1548963	+	chr4:193539784-193543783	955	4000	+	228228	2663	TRUNCATED_5'
Chr 15	1555509	1556839	+	chr4:193539784-193543783	955	2325	+	102035	1196	TRUNCATED_3'_fragment
Chr 15	4988321	4991312	+	chr4:193539784-193543783	955	4000	-	223150	2635	TRUNCATED_5'
Chr 15	4994290	4997292	+	chr4:193539784-193543783	946	4000	-	224902	2650	TRUNCATED_5'
Chr 15	5003126	5006043	+	chr4:193539784-193543783	955	4000	-	215139	2584	TRUNCATED_5'
Chr 15	5010376	5013330	+	chr4:193539784-193543783	955	4000	-	216698	2598	TRUNCATED_5'
Chr 15	5018155	5021046	+	chr4:193539784-193543783	955	4000	-	212908	2552	TRUNCATED_5'
Chr 15	5022885	5024706	+	chr4:193539784-193543783	2050	3996	+	101838	1464	TRUNCATED_5'_fragment
Chr 15	5028301	5031299	+	chr4:193539784-193543783	955	4000	+	222295	2640	TRUNCATED_5'
Chr 15	5037819	5040731	+	chr4:193539784-193543783	955	4000	+	212777	2566	TRUNCATED_5'
Chr 15	5047647	5050628	+	chr4:193539784-193543783	957	4000	-	218370	2615	TRUNCATED_5'
Chr 15	5054823	5055444	+	chr4:193542784-193543783	404	1000	-	35485	488	TRUNCATED_5'_fragment
Chr 15	5055356	5057065	+	chr4:193539784-193543783	2193	4000	+	109734	1436	TRUNCATED_5'_fragment
Chr 15	5059003	5061961	+	chr4:193539784-193543783	955	4000	-	220469	2625	TRUNCATED_5'
Chr 15	5066341	5068405	+	chr4:193539784-193543783	0	2116	-	157592	1840	5'_fragment
Chr 15	5068064	5070478	+	chr4:193539784-193543783	957	3640	-	178630	2155	TRUNCATED_3'_fragment
Chr 15	5074888	5077890	+	chr4:193539784-193543783	957	4000	-	225162	2646	TRUNCATED_5'
Chr 15	5083800	5086719	+	chr4:193539784-193543783	955	4000	-	213384	2581	TRUNCATED_5'
Chr 15	5091403	5093201	+	chr4:193539784-193543783	2189	4000	-	130143	1561	TRUNCATED_5'_fragment
Chr 15	5095627	5098620	+	chr4:193539784-193543783	955	4000	+	223219	2634	TRUNCATED_5'
Chr 15	5100849	5103838	+	chr4:193539784-193543783	955	4000	+	222119	2640	TRUNCATED_5'
Chr 15	5106050	5109021	+	chr4:193539784-193543783	955	4000	-	220365	2621	TRUNCATED_5'
Chr 15	5112017	5114933	+	chr4:193539784-193543783	955	3980	-	214109	2570	TRUNCATED_5'
Chr 15	5121386	5124671	+	chr4:193539784-193543783	653	4000	-	245721	2904	TRUNCATED_5'
Chr 15	5133235	5136227	+	chr4:193539784-193543783	955	4000	-	224091	2653	TRUNCATED_5'
Chr 15	5141360	5144356	+	chr4:193539784-193543783	955	4000	-	224511	2648	TRUNCATED_5'
Chr 15	5151156	5151806	+	chr4:193542784-193543783	348	1000	-	40760	531	TRUNCATED_5'_fragment
Chr 18	265242	266332	+	chr4:193539784-193543783	2959	4000	-	89429	990	TRUNCATED_5'_fragment
Chr 21	521640	524608	+	chr4:193539784-193543783	955	4000	-	217001	2593	TRUNCATED_5'
Chr 21	528720	531708	+	chr4:193539784-193543783	955	4000	-	222175	2625	TRUNCATED_5'
Chr 21	534617	537605	+	chr4:193539784-193543783	955	4000	-	224296	2643	TRUNCATED_5'
Chr 21	542484	545416	+	chr4:193539784-193543783	965	3999	-	220104	2603	TRUNCATED_5'
Chr 21	553015	556004	+	chr4:193539784-193543783	957	3998	-	222896	2623	TRUNCATED_5'
Chr 21	561778	564762	+	chr4:193539784-193543783	955	4000	-	222268	2641	TRUNCATED_5'
Chr 21	965098	968066	+	chr4:193539784-193543783	955	4000	-	217454	2598	TRUNCATED_5'
Chr 21	972242	975230	+	chr4:193539784-193543783	955	4000	-	223246	2634	TRUNCATED_5'
Chr 21	978139	981127	+	chr4:193539784-193543783	955	4000	-	224414	2642	TRUNCATED_5'
Chr 21	986005	988964	+	chr4:193539784-193543783	947	3999	-	221786	2622	TRUNCATED_5'
Chr 21	994104	997092	+	chr4:193539784-193543783	957	3998	-	223449	2633	TRUNCATED_5'
Chr 21	1001495	1004484	+	chr4:193539784-193543783	955	4000	-	222575	2642	TRUNCATED_5'
Chr 21	1014921	1016215	+	chr4:193539784-193543783	2660	4000	+	82486	1082	TRUNCATED_5'_fragment
Chr 21	1019324	1021168	+	chr4:193539784-193543783	957	2869	+	140967	1648	TRUNCATED_3'_fragment
Chr 21	1020999	1023459	+	chr4:193539784-193543783	955	3459	-	178363	2146	TRUNCATED_3'_fragment
Chr 21	1031204	1034145	+	chr4:193539784-193543783	955	4000	-	220334	2602	TRUNCATED_5'
Chr 21	1043302	1046270	+	chr4:193539784-193543783	955	4000	-	219022	2609	TRUNCATED_5'
Chr 21	1050268	1053247	+	chr4:193539784-193543783	955	4000	-	226010	2653	TRUNCATED_5'
Chr 21	1061928	1064543	+	chr4:193539784-193543783	955	4000	-	175583	2288	TRUNCATED_5'
Chr 21	1072762	1075756	+	chr4:193539784-193543783	955	4000	-	224993	2644	TRUNCATED_5'
Chr 21	1081880	1083508	+	chr4:193539784-193543783	2352	4000	-	110218	1378	TRUNCATED_5'_fragment
Chr 21	1083498	1084062	+	chr4:193542784-193543783	435	1000	+	35751	464	TRUNCATED_5'_fragment
Chr 21	1090805	1093777	+	chr4:193539784-193543783	955	4000	+	221252	2630	TRUNCATED_5'
Chr 21	1097913	1100542	+	chr4:193539784-193543783	955	3638	+	204963	2359	TRUNCATED_3'_fragment
Chr 21	1100202	1104124	+	chr4:193539784-193543783	0	4000	+	285507	3414	FULL
Chr 21	1112561	1115484	+	chr4:193539784-193543783	960	3940	+	216849	2567	TRUNCATED_5'
Chr 21	1953072	1953722	+	chr4:193542784-193543783	348	1000	+	42538	538	TRUNCATED_5'_fragment
Chr 21	1965156	1968149	+	chr4:193539784-193543783	955	4000	+	226449	2653	TRUNCATED_5'
Chr 21	1974627	1975957	+	chr4:193539784-193543783	955	2325	+	101129	1191	TRUNCATED_3'_fragment
Chr 21	6027479	6030465	+	chr4:193539784-193543783	955	4000	-	225237	2641	TRUNCATED_5'
Chr 21	6033433	6036434	+	chr4:193539784-193543783	947	4000	-	220734	2626	TRUNCATED_5'
Chr 21	6043080	6046065	+	chr4:193539784-193543783	955	4000	-	223064	2636	TRUNCATED_5'
Chr 21	6053941	6056660	+	chr4:193539784-193543783	955	4000	-	190016	2383	TRUNCATED_5'
Chr 21	6057995	6060989	+	chr4:193539784-193543783	955	4000	-	218942	2628	TRUNCATED_5'
Chr 21	6068888	6071877	+	chr4:193539784-193543783	955	4000	+	221691	2634	TRUNCATED_5'
Chr 21	6073883	6076870	+	chr4:193539784-193543783	955	4000	-	220898	2623	TRUNCATED_5'
Chr 21	6080185	6081977	+	chr4:193539784-193543783	2193	4000	-	127936	1547	TRUNCATED_5'_fragment
Chr 21	6081972	6082510	+	chr4:193542784-193543783	462	1000	+	33966	440	TRUNCATED_5'_fragment
Chr 21	6086363	6089357	+	chr4:193539784-193543783	955	4000	+	220195	2616	TRUNCATED_5'
Chr 21	6093894	6096883	+	chr4:193539784-193543783	955	4000	+	216639	2609	TRUNCATED_5'
Chr 21	6107105	6110125	+	chr4:193539784-193543783	947	4000	+	220867	2633	TRUNCATED_5'
Chr 21	6115621	6118613	+	chr4:193539784-193543783	955	4000	+	220086	2611	TRUNCATED_5'
Chr 21	6125428	6128377	+	chr4:193539784-193543783	955	4000	+	215245	2598	TRUNCATED_5'
Chr 21	6130096	6133081	+	chr4:193539784-193543783	955	3998	-	222763	2633	TRUNCATED_5'
Chr 21	6135230	6136315	+	chr4:193539784-193543783	2908	4000	-	74504	925	TRUNCATED_5'_fragment
Chr 21	6138498	6141490	+	chr4:193539784-193543783	955	4000	-	220592	2624	TRUNCATED_5'
Chr 21	6144952	6147939	+	chr4:193539784-193543783	955	4000	-	217838	2605	TRUNCATED_5'
Chr 21	6152746	6155730	+	chr4:193539784-193543783	957	4000	-	221268	2618	TRUNCATED_5'
Chr 21	6160886	6162247	+	chr4:193539784-193543783	2624	3998	-	98210	1180	TRUNCATED_5'_fragment
Chr 21	6162238	6163248	+	chr4:193539784-193543783	955	2010	-	77066	904	TRUNCATED_3'_fragment
Chr 21	6165623	6169469	+	chr4:193539784-193543783	0	3980	-	278643	3369	FULL
Chr 21	6169128	6169759	+	chr4:193542784-193543783	0	640	-	47372	559	TRUNCATED_5'_3'_fragment
Chr 21	6176665	6179664	+	chr4:193539784-193543783	946	4000	-	220151	2623	TRUNCATED_5'
Chr 21	6180511	6183480	+	chr4:193539784-193543783	955	4000	-	215804	2598	TRUNCATED_5'
Chr 21	6188226	6189022	+	chr4:193542784-193543783	206	1000	-	48945	650	TRUNCATED_5'_fragment
Chr 21	6191330	6191870	+	chr4:193542784-193543783	460	1000	-	33321	437	TRUNCATED_5'_fragment
Chr 21	6191863	6193652	+	chr4:193539784-193543783	2193	4000	+	125147	1529	TRUNCATED_5'_fragment
Chr 21	6198459	6201445	+	chr4:193539784-193543783	955	4000	+	213809	2579	TRUNCATED_5'
Chr 21	6213403	6214661	+	chr4:193539784-193543783	916	2224	+	92867	1120	TRUNCATED_3'_fragment
Chr 21	6220355	6223050	+	chr4:193539784-193543783	1243	4000	+	195859	2352	TRUNCATED_5'_fragment
Chr 21	6226362	6229351	+	chr4:193539784-193543783	955	4000	+	219806	2615	TRUNCATED_5'
Chr 21	6232803	6235762	+	chr4:193539784-193543783	955	4000	+	212574	2577	TRUNCATED_5'
Chr 21	6242796	6245784	+	chr4:193539784-193543783	955	4000	+	224871	2640	TRUNCATED_5'
Chr 21	6248071	6251050	+	chr4:193539784-193543783	955	4000	+	217892	2614	TRUNCATED_5'
Chr 21	6253450	6256442	+	chr4:193539784-193543783	955	4000	-	222385	2635	TRUNCATED_5'
Chr 21	6261809	6264788	+	chr4:193539784-193543783	955	4000	-	216837	2610	TRUNCATED_5'
Chr 21	6268643	6271630	+	chr4:193539784-193543783	955	4000	-	221592	2632	TRUNCATED_5'
Chr 21	6279098	6282084	+	chr4:193539784-193543783	957	4000	-	222149	2626	TRUNCATED_5'
Chr 21	6293544	6295338	+	chr4:193539784-193543783	2193	4000	-	128564	1541	TRUNCATED_5'_fragment
Chr 21	6295331	6295871	+	chr4:193542784-193543783	460	1000	+	33932	441	TRUNCATED_5'_fragment
Chr 21	6304848	6305950	+	chr4:193539784-193543783	955	2108	-	85448	997	TRUNCATED_3'_fragment
Chr 21	6325041	6327619	+	chr4:193539784-193543783	1341	4000	-	195736	2297	TRUNCATED_5'_fragment
Chr 22	1884999	1887987	+	chr4:193539784-193543783	955	4000	-	182598	2443	TRUNCATED_5'
Chr 22	1894673	1897665	+	chr4:193539784-193543783	955	4000	-	223142	2631	TRUNCATED_5'
Chr 22	1900574	1903562	+	chr4:193539784-193543783	955	4000	-	225311	2648	TRUNCATED_5'
Chr 22	1908443	1911375	+	chr4:193539784-193543783	965	3999	-	220779	2605	TRUNCATED_5'
Chr 22	1918974	1921963	+	chr4:193539784-193543783	957	3998	-	223110	2624	TRUNCATED_5'
Chr 22	1927737	1930727	+	chr4:193539784-193543783	955	4000	-	223209	2646	TRUNCATED_5'
Chr 22	2241911	2244879	+	chr4:193539784-193543783	955	4000	-	217335	2595	TRUNCATED_5'
Chr 22	2249057	2252045	+	chr4:193539784-193543783	955	4000	-	222969	2633	TRUNCATED_5'
Chr 22	2254954	2257942	+	chr4:193539784-193543783	955	4000	-	223733	2638	TRUNCATED_5'
Chr 22	2262821	2265780	+	chr4:193539784-193543783	947	3999	-	221190	2615	TRUNCATED_5'
Chr 22	2270920	2273908	+	chr4:193539784-193543783	957	3998	-	223863	2637	TRUNCATED_5'
Chr 22	2278311	2281300	+	chr4:193539784-193543783	955	4000	-	222767	2643	TRUNCATED_5'
Chr 22	2291737	2293031	+	chr4:193539784-193543783	2660	4000	+	82427	1081	TRUNCATED_5'_fragment
Chr 22	2296072	2297916	+	chr4:193539784-193543783	957	2869	+	141142	1648	TRUNCATED_3'_fragment
Chr 22	2297747	2300207	+	chr4:193539784-193543783	955	3459	-	177763	2142	TRUNCATED_3'_fragment
Chr 22	2308021	2310962	+	chr4:193539784-193543783	955	4000	-	219812	2600	TRUNCATED_5'
Chr 22	2320119	2323089	+	chr4:193539784-193543783	955	4000	-	219295	2607	TRUNCATED_5'
Chr 22	2327087	2330065	+	chr4:193539784-193543783	955	4000	-	225758	2650	TRUNCATED_5'
Chr 22	2339638	2342631	+	chr4:193539784-193543783	955	4000	-	223824	2637	TRUNCATED_5'
Chr 22	2350861	2352540	+	chr4:193539784-193543783	2352	4000	-	107011	1372	TRUNCATED_5'_fragment
Chr 22	2352530	2353090	+	chr4:193542784-193543783	435	996	+	35642	462	TRUNCATED_5'_fragment
Chr 22	2359837	2362800	+	chr4:193539784-193543783	955	4000	+	219585	2619	TRUNCATED_5'
Chr 22	2367601	2370229	+	chr4:193539784-193543783	955	3638	+	206202	2367	TRUNCATED_3'_fragment
Chr 22	2369889	2373815	+	chr4:193539784-193543783	0	4000	+	287229	3423	FULL
Chr 22	2383202	2386128	+	chr4:193539784-193543783	960	3940	+	220100	2583	TRUNCATED_5'
Chr 22	3502662	3503312	+	chr4:193542784-193543783	348	1000	+	42416	537	TRUNCATED_5'_fragment
Chr 22	3514746	3517741	+	chr4:193539784-193543783	955	4000	+	228228	2663	TRUNCATED_5'
Chr 22	3524287	3525617	+	chr4:193539784-193543783	955	2325	+	102166	1197	TRUNCATED_3'_fragment
Chr 22	6012738	6015731	+	chr4:193539784-193543783	955	4000	-	222677	2632	TRUNCATED_5'
Chr 22	6018706	6021710	+	chr4:193539784-193543783	946	4000	-	227072	2663	TRUNCATED_5'
Chr 22	6025967	6029821	+	chr4:193539784-193543783	0	4000	-	285248	3417	FULL
Chr 22	6029481	6032108	+	chr4:193539784-193543783	955	3640	-	203060	2343	TRUNCATED_3'_fragment
Chr 22	6038914	6041907	+	chr4:193539784-193543783	955	4000	-	222438	2632	TRUNCATED_5'
Chr 22	6046561	6049544	+	chr4:193539784-193543783	955	3997	-	218769	2614	TRUNCATED_5'
Chr 22	6057216	6057899	+	chr4:193542784-193543783	315	1000	-	45312	572	TRUNCATED_5'_fragment
Chr 22	6059265	6062305	+	chr4:193539784-193543783	955	4000	+	218161	2621	TRUNCATED_5'
Chr 22	6063368	6066359	+	chr4:193539784-193543783	955	4000	+	220551	2624	TRUNCATED_5'
Chr 22	6068130	6069208	+	chr4:193539784-193543783	2908	4000	+	75855	933	TRUNCATED_5'_fragment
Chr 22	6074227	6077210	+	chr4:193539784-193543783	957	4000	+	222842	2623	TRUNCATED_5'
Chr 22	6080654	6083638	+	chr4:193539784-193543783	957	4000	+	225089	2651	TRUNCATED_5'
Chr 22	6090557	6093543	+	chr4:193539784-193543783	946	4000	+	215818	2603	TRUNCATED_5'
Chr 22	6100404	6103389	+	chr4:193539784-193543783	955	4000	+	220437	2622	TRUNCATED_5'
Chr 22	6124170	6127157	+	chr4:193539784-193543783	955	4000	+	224106	2646	TRUNCATED_5'
Chr 22	6131970	6133074	+	chr4:193539784-193543783	955	2108	+	86053	1000	TRUNCATED_3'_fragment
Chr 22	6138113	6141100	+	chr4:193539784-193543783	955	4000	-	220232	2635	TRUNCATED_5'
Chr 22	6149196	6152187	+	chr4:193539784-193543783	955	4000	-	223430	2641	TRUNCATED_5'
Chr 22	6154270	6156626	+	chr4:193539784-193543783	1607	4000	-	173214	2064	TRUNCATED_5'_fragment
Chr 22	6181413	6183058	+	chr4:193539784-193543783	433	2120	+	127833	1480	5'_fragment
Chr 22	6183046	6184319	+	chr4:193539784-193543783	955	2267	-	101454	1161	TRUNCATED_3'_fragment
Chr 22	6190004	6190207	+	chr4:193542784-193543783	793	998	-	12423	167	pLAM-only
Chr 22	6192324	6195313	+	chr4:193539784-193543783	955	4000	-	226307	2662	TRUNCATED_5'
Chr 22	6196946	6198118	+	chr4:193539784-193543783	955	2169	-	90438	1055	TRUNCATED_3'_fragment
Chr 22	6204092	6207091	+	chr4:193539784-193543783	955	4000	-	222590	2630	TRUNCATED_5'
Chr 22	6211070	6211609	+	chr4:193542784-193543783	460	1000	-	35532	447	TRUNCATED_5'_fragment
Chr 22	6211547	6213384	+	chr4:193539784-193543783	2150	4000	+	127724	1571	TRUNCATED_5'_fragment
Chr 22	6217783	6220739	+	chr4:193539784-193543783	955	4000	+	224632	2644	TRUNCATED_5'
Chr 22	6226366	6229350	+	chr4:193539784-193543783	955	4000	+	226938	2665	TRUNCATED_5'
Chr 22	6234501	6237359	+	chr4:193539784-193543783	959	3918	+	226277	2605	TRUNCATED_5'
Chr 22	7870740	7873721	+	chr4:193539784-193543783	960	3994	-	223630	2633	TRUNCATED_5'
Chr 22	7883929	7887852	+	chr4:193539784-193543783	0	4000	-	286689	3422	FULL
Chr 22	7887512	7890141	+	chr4:193539784-193543783	955	3638	-	205963	2361	TRUNCATED_3'_fragment
Chr 22	7904974	7907963	+	chr4:193539784-193543783	955	4000	+	223122	2643	TRUNCATED_5'
Chr 22	7912916	7915904	+	chr4:193539784-193543783	957	3998	+	221756	2625	TRUNCATED_5'
Chr 22	7923374	7926319	+	chr4:193539784-193543783	965	3999	+	223156	2625	TRUNCATED_5'
Chr 22	7928679	7931669	+	chr4:193539784-193543783	955	4000	+	222960	2629	TRUNCATED_5'
Chr 22	7934577	7937570	+	chr4:193539784-193543783	955	4000	+	221012	2622	TRUNCATED_5'
Chr 22	7941433	7944392	+	chr4:193539784-193543783	965	4000	+	215036	2581	TRUNCATED_5'
Chr 22	7952094	7955068	+	chr4:193539784-193543783	955	4000	+	182126	2434	TRUNCATED_5'
Chr 22	7964040	7967023	+	chr4:193539784-193543783	955	4000	+	221456	2627	TRUNCATED_5'
Chr 22	9364840	9368351	+	chr4:193539784-193543783	433	4000	+	266927	3125	TRUNCATED_5'
Chr 22	9379651	9380708	+	chr4:193539784-193543783	2523	3638	+	80503	952	TRUNCATED_5'_3'_fragment
Chr 22	9380412	9384099	+	chr4:193539784-193543783	0	4000	+	266021	3247	FULL
Chr 22	9394596	9397579	+	chr4:193539784-193543783	955	4000	+	219763	2623	TRUNCATED_5'
Chr 22	9400549	9403483	+	chr4:193539784-193543783	955	3999	+	200747	2517	TRUNCATED_5'
Chr 22	9407589	9410575	+	chr4:193539784-193543783	955	4000	+	224264	2641	TRUNCATED_5'
Chr 22	9411878	9412062	+	chr4:193542784-193543783	799	984	+	9315	146	pLAM-only
Chr 22	9413722	9416088	+	chr4:193539784-193543783	955	3458	-	179489	2117	TRUNCATED_3'_fragment
Chr 22	9418452	9421448	+	chr4:193539784-193543783	955	4000	-	219864	2622	TRUNCATED_5'
Chr 22	9426948	9429923	+	chr4:193539784-193543783	947	4000	-	216717	2609	TRUNCATED_5'
Chr 22	9433848	9435123	+	chr4:193539784-193543783	2710	3998	-	90228	1098	TRUNCATED_5'_fragment
Chr 22	9436090	9439074	+	chr4:193539784-193543783	955	3998	+	221356	2629	TRUNCATED_5'
Chr 22	9442094	9442915	+	chr4:193542784-193543783	134	1000	+	49621	668	TRUNCATED_5'_fragment
Chr 22	9446823	9449803	+	chr4:193539784-193543783	955	3988	+	220662	2614	TRUNCATED_5'
Chr 22	9451625	9454614	+	chr4:193539784-193543783	955	4000	+	221512	2629	TRUNCATED_5'
Chr 22	9456241	9458262	+	chr4:193539784-193543783	1946	3984	+	146396	1761	TRUNCATED_5'_fragment
Chr 22	9463626	9466213	+	chr4:193539784-193543783	955	4000	+	165122	2230	TRUNCATED_5'
Chr 22	9469457	9470818	+	chr4:193539784-193543783	955	2357	+	107513	1231	TRUNCATED_3'_fragment
Chr 22	9470824	9473241	+	chr4:193539784-193543783	955	3434	-	186275	2168	TRUNCATED_3'_fragment
Chr 22	9477780	9480787	+	chr4:193539784-193543783	955	4000	-	221875	2633	TRUNCATED_5'
Chr 22	9484448	9487435	+	chr4:193539784-193543783	955	4000	-	221904	2637	TRUNCATED_5'
Chr 22	9489794	9492616	+	chr4:193539784-193543783	955	4000	-	201163	2460	TRUNCATED_5'
Chr 22	9496657	9498155	+	chr4:193539784-193543783	955	2494	-	115169	1339	TRUNCATED_3'_fragment
Chr 22	9498919	9500196	+	chr4:193539784-193543783	2710	4000	+	87434	1081	TRUNCATED_5'_fragment
Chr 22	9509714	9511321	+	chr4:193539784-193543783	955	2603	+	123990	1439	TRUNCATED_3'_fragment
Chr 22	9513527	9516515	+	chr4:193539784-193543783	955	4000	-	220604	2625	TRUNCATED_5'
Chr 22	9519110	9520174	+	chr4:193539784-193543783	955	2059	-	80884	951	TRUNCATED_3'_fragment
Chr 22	9542081	9545046	+	chr4:193539784-193543783	955	3999	+	215824	2590	TRUNCATED_5'
Chr 22	9555244	9558231	+	chr4:193539784-193543783	955	4000	-	223774	2640	TRUNCATED_5'
Chr 22	9562337	9563746	+	chr4:193539784-193543783	2526	3999	-	79641	1133	TRUNCATED_5'_fragment
Chr 22	9563628	9566468	+	chr4:193539784-193543783	1108	4000	+	207715	2476	TRUNCATED_5'_fragment
Chr 22	9573044	9575852	+	chr4:193539784-193543783	955	3998	+	200115	2455	TRUNCATED_5'
Chr 22	9582303	9585284	+	chr4:193539784-193543783	955	4000	+	218721	2610	TRUNCATED_5'
Chr 22	9595822	9598815	+	chr4:193539784-193543783	955	4000	+	226954	2656	TRUNCATED_5'
Chr 22	9605542	9608534	+	chr4:193539784-193543783	955	4000	+	224147	2639	TRUNCATED_5'
Chr 22	9612867	9615857	+	chr4:193539784-193543783	955	4000	+	224096	2643	TRUNCATED_5'
Chr 22	9633036	9636025	+	chr4:193539784-193543783	955	4000	+	221851	2630	TRUNCATED_5'
Chr 22	9639333	9642320	+	chr4:193539784-193543783	955	4000	+	221869	2633	TRUNCATED_5'
Chr 22	9649011	9651686	+	chr4:193539784-193543783	955	3683	-	204903	2383	TRUNCATED_3'_fragment
Chr 22	9654466	9657439	+	chr4:193539784-193543783	955	3980	-	220429	2616	TRUNCATED_5'
Chr 22	9663616	9666590	+	chr4:193539784-193543783	955	4000	-	222629	2627	TRUNCATED_5'
Chr 22	9667352	9668627	+	chr4:193539784-193543783	2710	4000	+	86655	1083	TRUNCATED_5'_fragment
Chr 22	9676075	9677298	+	chr4:193539784-193543783	1665	2895	+	95321	1088	TRUNCATED_5'_3'_fragment
Chr 22	9677248	9677597	+	chr4:193542784-193543783	275	640	+	21266	284	TRUNCATED_5'_3'_fragment
Chr 22	9677286	9681188	+	chr4:193539784-193543783	31	4000	+	289422	3424	FULL
Chr 22	9683807	9685671	+	chr4:193539784-193543783	947	2869	+	134903	1617	TRUNCATED_3'_fragment
Chr Y	11527467	11530448	+	chr4:193539784-193543783	955	4000	+	224230	2653	TRUNCATED_5'
Chr Y	11535469	11538459	+	chr4:193539784-193543783	955	4000	+	223336	2636	TRUNCATED_5'
Chr Y	11542116	11545096	+	chr4:193539784-193543783	955	3998	+	221871	2621	TRUNCATED_5'
Chr Y	11552893	11555790	+	chr4:193539784-193543783	955	3918	+	228069	2628	TRUNCATED_5'

## Sheet: Table_S5
Supplemental Table S5: DUX4 ORF paralogs found in the T2T CHM13v2.0/hs1 reference human genome.
format of the LASTZ command: lastz T2T_CHM13v20_chromosome.faa chr4_193539784-193543783.fasta DUX4_CDS.fasta ‑‑format=general:name1,zstart1,end1,strand1,name2,zstart2+,end2+,strand2,score,nmatch --filter=coverage:25 --filter=identity:80
DUX4_CDS.fasta = chr4:193541579-193542855
Type: Overlap = overlaps D4Z4-pLAM query (Table S1), Unique = does not overlap D4Z4 query
Chromosome	zstart1	end1	strand1	DUX4_CDS	zstart2+	end2+	strand2	nmatch	Class
Chr 1	128098612	128099670	+	DUX4	0	1074	-	913	Overlap
Chr 1	128106468	128107738	+	DUX4	0	1277	-	1149	Overlap
Chr 1	128109442	128110536	+	DUX4	0	1100	-	974	Overlap
Chr 1	128119452	128119808	+	DUX4	915	1277	-	309	Overlap
Chr 1	128121350	128122617	+	DUX4	0	1275	+	1138	Overlap
Chr 1	128129842	128131112	+	DUX4	0	1277	+	1147	Overlap
Chr 1	128138396	128139667	+	DUX4	0	1277	+	1145	Overlap
Chr 1	128147945	128149212	+	DUX4	0	1277	-	1150	Overlap
Chr 1	128154236	128155506	+	DUX4	0	1277	-	1140	Overlap
Chr 1	128179992	128180864	+	DUX4	398	1277	+	767	Overlap
Chr 1	128193619	128194886	+	DUX4	0	1276	+	1126	Overlap
Chr 1	128202450	128203721	+	DUX4	0	1277	+	1142	Overlap
Chr 1	128209011	128210281	+	DUX4	0	1277	+	1142	Overlap
Chr 1	128217164	128218436	+	DUX4	1	1277	+	1128	Overlap
Chr 1	128222541	128223806	+	DUX4	1	1276	-	1124	Overlap
Chr 1	128229225	128230494	+	DUX4	0	1277	-	1129	Overlap
Chr 1	128239253	128240522	+	DUX4	0	1277	-	1129	Overlap
Chr 1	128249274	128250542	+	DUX4	1	1277	-	1121	Overlap
Chr 1	128255109	128256379	+	DUX4	0	1277	-	1136	Overlap
Chr 1	128261380	128262655	+	DUX4	0	1276	-	1138	Overlap
Chr 1	128268141	128269409	+	DUX4	0	1277	-	1132	Overlap
Chr 1	128274929	128275358	+	DUX4	0	429	-	385	Overlap
Chr 1	128288110	128289381	+	DUX4	0	1277	-	1133	Overlap
Chr 1	128299264	128300540	+	DUX4	0	1276	-	1137	Overlap
Chr 1	128304970	128306240	+	DUX4	0	1277	-	1127	Overlap
Chr 1	128314461	128315728	+	DUX4	3	1277	-	1132	Overlap
Chr 1	128321377	128322648	+	DUX4	0	1277	-	1138	Overlap
Chr 1	128328349	128329619	+	DUX4	0	1277	-	1128	Overlap
Chr 1	128343595	128344864	+	DUX4	0	1277	-	1143	Overlap
Chr 1	128350745	128351616	+	DUX4	398	1277	+	758	Overlap
Chr 1	128356484	128357755	+	DUX4	0	1277	+	1120	Overlap
Chr 1	128361483	128362752	+	DUX4	0	1277	+	1147	Overlap
Chr 1	128370095	128370627	+	DUX4	0	532	+	480	Overlap
Chr 1	128381068	128381631	+	DUX4	0	564	+	512	Overlap
Chr 1	128381990	128383262	+	DUX4	0	1277	-	1134	Overlap
Chr 1	128389861	128391131	+	DUX4	0	1277	-	1128	Overlap
Chr 1	128397875	128399144	+	DUX4	0	1277	-	1114	Overlap
Chr 1	128406846	128408021	+	DUX4	0	1277	-	1045	Overlap
Chr 1	128414416	128415687	+	DUX4	0	1277	-	1117	Overlap
Chr 1	128421743	128422968	+	DUX4	0	1277	-	1094	Overlap
Chr 1	128435689	128436914	+	DUX4	0	1277	+	1101	Overlap
Chr 1	128442074	128443345	+	DUX4	0	1277	+	1127	Overlap
Chr 1	128448990	128450244	+	DUX4	0	1277	+	1112	Overlap
Chr 1	128458951	128460222	+	DUX4	0	1277	+	1129	Overlap
Chr 1	128470624	128471891	+	DUX4	0	1277	+	1143	Overlap
Chr 1	128475519	128476783	+	DUX4	1	1277	-	1135	Overlap
Chr 1	128488242	128489512	+	DUX4	0	1277	-	1126	Overlap
Chr 1	128500406	128501677	+	DUX4	0	1277	-	1128	Overlap
Chr 1	128511805	128513026	+	DUX4	0	1276	-	1092	Overlap
Chr 1	128522353	128523623	+	DUX4	0	1276	-	1130	Overlap
Chr 1	128532342	128533613	+	DUX4	0	1277	-	1132	Overlap
Chr 1	128540780	128541650	+	DUX4	398	1276	+	750	Overlap
Chr 1	128545247	128546468	+	DUX4	0	1277	+	1086	Overlap
Chr 1	128551421	128552685	+	DUX4	1	1276	+	1116	Overlap
Chr 1	128556671	128557938	+	DUX4	0	1277	-	1131	Overlap
Chr 1	128562727	128563173	+	DUX4	224	670	-	399	Unique
Chr 1	128567571	128568838	+	DUX4	0	1277	+	1143	Overlap
Chr 1	128572440	128573716	+	DUX4	1	1276	+	1124	Overlap
Chr 1	128583043	128584270	+	DUX4	1	1277	+	1096	Overlap
Chr 1	128588954	128590225	+	DUX4	0	1277	+	1155	Overlap
Chr 10	42530030	42531301	+	DUX4	0	1277	-	1156	Overlap
Chr 10	42535881	42537152	+	DUX4	0	1277	-	1144	Overlap
Chr 10	42544299	42545575	+	DUX4	1	1276	-	1134	Overlap
Chr 10	134615846	134616528	+	DUX4	589	1277	+	681	Overlap
Chr 10	134618564	134619835	+	DUX4	0	1277	+	1269	Overlap
Chr 10	134621871	134623142	+	DUX4	0	1277	+	1269	Overlap
Chr 10	134625178	134626449	+	DUX4	0	1277	+	1269	Overlap
Chr 10	134628488	134629759	+	DUX4	0	1277	+	1269	Overlap
Chr 10	134631798	134633069	+	DUX4	0	1277	+	1269	Overlap
Chr 10	134635108	134636379	+	DUX4	0	1277	+	1269	Overlap
Chr 10	134638418	134639689	+	DUX4	0	1277	+	1269	Overlap
Chr 10	134641728	134642999	+	DUX4	0	1277	+	1269	Overlap
Chr 10	134645038	134646309	+	DUX4	0	1277	+	1269	Overlap
Chr 10	134648348	134649619	+	DUX4	0	1277	+	1269	Overlap
Chr 10	134651658	134652929	+	DUX4	0	1277	+	1269	Overlap
Chr 10	134654968	134656239	+	DUX4	0	1277	+	1269	Overlap
Chr 10	134658278	134659549	+	DUX4	0	1277	+	1269	Overlap
Chr 10	134661588	134662859	+	DUX4	0	1277	+	1269	Overlap
Chr 10	134664898	134666169	+	DUX4	0	1277	+	1269	Overlap
Chr 10	134668208	134669479	+	DUX4	0	1277	+	1269	Overlap
Chr 10	134671518	134672789	+	DUX4	0	1277	+	1268	Overlap
Chr 10	134674824	134676095	+	DUX4	0	1277	+	1267	Overlap
Chr 10	134678135	134679406	+	DUX4	0	1277	+	1269	Overlap
Chr 10	134681446	134682724	+	DUX4	0	1277	+	1268	Overlap
Chr 10	134684777	134686047	+	DUX4	0	1277	+	1266	Overlap
Chr 10	134688088	134689364	+	DUX4	0	1277	+	1268	Overlap
Chr 10	134691405	134692676	+	DUX4	0	1277	+	1269	Overlap
Chr 10	134694716	134695987	+	DUX4	0	1277	+	1269	Overlap
Chr 10	134698027	134699298	+	DUX4	0	1277	+	1269	Overlap
Chr 10	134701337	134702608	+	DUX4	0	1277	+	1269	Overlap
Chr 10	134704647	134705918	+	DUX4	0	1277	+	1269	Overlap
Chr 10	134707957	134709228	+	DUX4	0	1277	+	1269	Overlap
Chr 10	134711267	134712538	+	DUX4	0	1277	+	1269	Overlap
Chr 10	134714577	134715848	+	DUX4	0	1277	+	1269	Overlap
Chr 10	134717887	134719158	+	DUX4	0	1277	+	1269	Overlap
Chr 10	134721197	134722468	+	DUX4	0	1277	+	1269	Overlap
Chr 10	134724507	134725778	+	DUX4	0	1277	+	1269	Overlap
Chr 12	34086050	34087311	+	DUX4	0	1272	-	1030	Unique
Chr 13	4986034	4987306	+	DUX4	0	1277	+	1155	Overlap
Chr 13	4995572	4996103	+	DUX4	0	530	+	468	Overlap
Chr 13	9629795	9631067	+	DUX4	0	1277	-	1150	Overlap
Chr 13	9635765	9637036	+	DUX4	0	1277	-	1160	Overlap
Chr 13	9644585	9645798	+	DUX4	0	1276	-	1098	Overlap
Chr 13	9651851	9653092	+	DUX4	0	1277	-	1102	Overlap
Chr 13	9659629	9660799	+	DUX4	0	1277	-	1050	Overlap
Chr 13	9663438	9664452	+	DUX4	255	1277	+	903	Overlap
Chr 13	9669668	9670934	+	DUX4	0	1277	+	1130	Overlap
Chr 13	9679173	9680432	+	DUX4	1	1276	+	1120	Overlap
Chr 13	9689122	9690390	+	DUX4	0	1277	-	1139	Overlap
Chr 13	9695909	9696780	+	DUX4	398	1277	+	762	Overlap
Chr 13	9700475	9701710	+	DUX4	0	1277	-	1105	Overlap
Chr 13	9706894	9707215	+	DUX4	0	321	-	286	Overlap
Chr 13	9709003	9710233	+	DUX4	0	1245	-	1102	Overlap
Chr 13	9716369	9717645	+	DUX4	0	1277	-	1144	Overlap
Chr 13	9729241	9730510	+	DUX4	0	1277	-	1133	Overlap
Chr 13	9736891	9737767	+	DUX4	394	1277	-	783	Overlap
Chr 13	9740991	9742264	+	DUX4	0	1277	+	1137	Overlap
Chr 13	9746212	9747481	+	DUX4	0	1276	+	1143	Overlap
Chr 13	9751537	9752803	+	DUX4	1	1276	-	1137	Overlap
Chr 13	9757477	9758699	+	DUX4	0	1277	-	1098	Overlap
Chr 13	9766874	9768144	+	DUX4	0	1277	-	1145	Overlap
Chr 13	9778724	9779993	+	DUX4	0	1276	-	1152	Overlap
Chr 13	9786848	9788120	+	DUX4	0	1277	-	1153	Overlap
Chr 13	11615704	11616432	+	DUX4	499	1270	+	584	Unique
Chr 13	12841367	12842110	+	DUX4	499	1270	-	602	Unique
Chr 14	825220	826469	+	DUX4	0	1277	-	1111	Overlap
Chr 14	832360	833629	+	DUX4	3	1277	-	1136	Overlap
Chr 14	838121	839392	+	DUX4	0	1277	-	1133	Overlap
Chr 14	845990	847224	+	DUX4	0	1277	-	1105	Overlap
Chr 14	854088	855359	+	DUX4	0	1277	-	1139	Overlap
Chr 14	861482	862752	+	DUX4	0	1277	-	1156	Overlap
Chr 14	873986	874391	+	DUX4	865	1277	+	364	Overlap
Chr 14	879029	880096	+	DUX4	1	1074	+	953	Overlap
Chr 14	880319	881590	+	DUX4	0	1277	-	1148	Overlap
Chr 14	891077	892346	+	DUX4	0	1277	-	1147	Overlap
Chr 14	903217	904471	+	DUX4	0	1277	-	1106	Overlap
Chr 14	910188	911458	+	DUX4	0	1277	-	1157	Overlap
Chr 14	922740	924011	+	DUX4	0	1277	-	1139	Overlap
Chr 14	934012	934720	+	DUX4	557	1276	-	618	Overlap
Chr 14	942814	944059	+	DUX4	0	1277	+	1129	Overlap
Chr 14	950579	951846	+	DUX4	0	1277	+	1144	Overlap
Chr 14	953820	955089	+	DUX4	0	1277	+	1125	Overlap
Chr 14	961055	962325	+	DUX4	0	1276	+	1132	Overlap
Chr 14	1325905	1327177	+	DUX4	0	1277	+	1157	Overlap
Chr 14	1335443	1335974	+	DUX4	0	530	+	470	Overlap
Chr 14	3104480	3105753	+	DUX4	0	1277	-	1148	Overlap
Chr 14	3110451	3111722	+	DUX4	0	1277	-	1162	Overlap
Chr 14	3119272	3120485	+	DUX4	0	1276	-	1096	Overlap
Chr 14	3126538	3127779	+	DUX4	0	1277	-	1102	Overlap
Chr 14	3134313	3135483	+	DUX4	0	1277	-	1047	Overlap
Chr 14	3138122	3139136	+	DUX4	255	1277	+	904	Overlap
Chr 14	3144353	3145619	+	DUX4	0	1277	+	1129	Overlap
Chr 14	3153858	3155117	+	DUX4	1	1276	+	1119	Overlap
Chr 14	3163808	3165076	+	DUX4	0	1277	-	1134	Overlap
Chr 14	3170595	3171466	+	DUX4	398	1277	+	763	Overlap
Chr 14	3175161	3176396	+	DUX4	0	1277	-	1107	Overlap
Chr 14	3181580	3181901	+	DUX4	0	321	-	285	Overlap
Chr 14	3183689	3184919	+	DUX4	0	1245	-	1103	Overlap
Chr 14	3191400	3192676	+	DUX4	0	1277	-	1144	Overlap
Chr 14	3204272	3205541	+	DUX4	0	1277	-	1135	Overlap
Chr 14	3211922	3212798	+	DUX4	394	1277	-	781	Overlap
Chr 14	3216022	3217295	+	DUX4	0	1277	+	1141	Overlap
Chr 14	3221243	3222512	+	DUX4	0	1276	+	1144	Overlap
Chr 14	3226568	3227834	+	DUX4	1	1276	-	1137	Overlap
Chr 14	3232508	3233730	+	DUX4	0	1277	-	1096	Overlap
Chr 14	3241906	3243176	+	DUX4	0	1277	-	1146	Overlap
Chr 14	3253755	3255024	+	DUX4	0	1276	-	1150	Overlap
Chr 14	3261879	3263151	+	DUX4	0	1277	-	1154	Overlap
Chr 14	4085350	4086028	+	DUX4	593	1277	+	617	Overlap
Chr 14	4092626	4093896	+	DUX4	0	1277	+	1152	Overlap
Chr 14	4100148	4101095	+	DUX4	0	1275	+	837	Overlap
Chr 14	4105541	4106824	+	DUX4	4	1277	-	1135	Overlap
Chr 14	4115627	4116905	+	DUX4	0	1277	-	1145	Overlap
Chr 14	4124033	4125304	+	DUX4	0	1277	-	1137	Overlap
Chr 14	4132419	4132775	+	DUX4	915	1277	-	321	Overlap
Chr 14	4134405	4135675	+	DUX4	0	1277	+	1139	Overlap
Chr 14	4145072	4146342	+	DUX4	0	1277	+	1146	Overlap
Chr 14	4148715	4149985	+	DUX4	0	1276	+	1133	Overlap
Chr 14	4154740	4156009	+	DUX4	0	1277	+	1124	Overlap
Chr 14	4162081	4163335	+	DUX4	0	1277	+	1117	Overlap
Chr 14	4173352	4174219	+	DUX4	0	1276	+	750	Overlap
Chr 14	4179184	4179748	+	DUX4	0	564	+	517	Overlap
Chr 14	4180106	4181377	+	DUX4	0	1277	-	1143	Overlap
Chr 14	4185175	4186132	+	DUX4	0	1277	-	847	Overlap
Chr 14	4192375	4193644	+	DUX4	0	1276	-	1139	Overlap
Chr 14	4197721	4198998	+	DUX4	0	1277	-	1137	Overlap
Chr 14	4203676	4204376	+	DUX4	0	699	-	622	Overlap
Chr 14	4205870	4206226	+	DUX4	915	1277	+	318	Overlap
Chr 14	4217321	4218129	+	DUX4	0	808	+	722	Overlap
Chr 14	4218445	4218780	+	DUX4	231	566	-	301	Unique
Chr 14	4221254	4222524	+	DUX4	0	1277	-	1138	Overlap
Chr 14	4227693	4228961	+	DUX4	0	1277	-	1148	Overlap
Chr 14	4237129	4238400	+	DUX4	0	1277	-	1133	Overlap
Chr 14	4256655	4257925	+	DUX4	0	1277	+	1137	Overlap
Chr 14	4275219	4276478	+	DUX4	0	1277	+	1149	Overlap
Chr 14	4281020	4282291	+	DUX4	0	1277	+	1143	Overlap
Chr 14	4292424	4293694	+	DUX4	0	1277	-	1140	Overlap
Chr 14	4299274	4300545	+	DUX4	0	1277	-	1130	Overlap
Chr 14	4307491	4308762	+	DUX4	0	1277	-	1126	Overlap
Chr 14	4319470	4320741	+	DUX4	0	1277	-	1148	Overlap
Chr 14	4322669	4323211	+	DUX4	728	1277	-	486	Overlap
Chr 14	4335709	4336979	+	DUX4	0	1277	-	1158	Overlap
Chr 14	4374375	4375526	+	DUX4	107	1277	+	974	Overlap
Chr 14	4987274	4988543	+	DUX4	0	1277	+	1148	Overlap
Chr 14	4996284	4997532	+	DUX4	0	1277	+	1130	Overlap
Chr 14	5015835	5017106	+	DUX4	0	1277	+	1148	Overlap
Chr 14	5022665	5023856	+	DUX4	0	1198	+	1064	Overlap
Chr 14	5031226	5032499	+	DUX4	0	1277	+	1140	Overlap
Chr 14	5036676	5037937	+	DUX4	5	1276	-	1126	Overlap
Chr 14	5041873	5043143	+	DUX4	0	1277	-	1128	Overlap
Chr 14	5051487	5052756	+	DUX4	1	1277	-	1122	Overlap
Chr 14	5058816	5060086	+	DUX4	0	1277	-	1137	Overlap
Chr 14	5064873	5066149	+	DUX4	0	1277	-	1132	Overlap
Chr 14	5071572	5072840	+	DUX4	0	1277	-	1129	Overlap
Chr 14	5073382	5074651	+	DUX4	0	1277	-	1128	Overlap
Chr 14	5079614	5080882	+	DUX4	0	1277	-	1139	Overlap
Chr 14	5087157	5087586	+	DUX4	0	429	-	387	Overlap
Chr 14	5100409	5101680	+	DUX4	0	1277	-	1122	Overlap
Chr 14	5108350	5109621	+	DUX4	0	1277	-	1134	Overlap
Chr 14	5115391	5116661	+	DUX4	0	1277	-	1132	Overlap
Chr 14	5130400	5131668	+	DUX4	0	1277	-	1147	Overlap
Chr 14	5141544	5142814	+	DUX4	0	1277	-	1154	Overlap
Chr 14	5147090	5148269	+	DUX4	0	1277	-	1066	Overlap
Chr 14	5154087	5155012	+	DUX4	355	1277	+	787	Overlap
Chr 14	5159970	5161241	+	DUX4	0	1277	+	1121	Overlap
Chr 14	5165044	5166313	+	DUX4	0	1277	+	1136	Overlap
Chr 14	5173577	5174109	+	DUX4	0	532	+	486	Overlap
Chr 14	5184999	5185563	+	DUX4	0	564	+	516	Overlap
Chr 14	5185922	5187195	+	DUX4	0	1277	-	1134	Overlap
Chr 14	5197767	5199037	+	DUX4	0	1277	-	1132	Overlap
Chr 14	5205644	5206912	+	DUX4	0	1277	-	1122	Overlap
Chr 14	5217730	5218994	+	DUX4	1	1277	+	1143	Overlap
Chr 14	5222622	5223890	+	DUX4	0	1277	-	1150	Overlap
Chr 14	5235099	5236370	+	DUX4	0	1277	-	1137	Overlap
Chr 14	5241816	5242991	+	DUX4	0	1277	-	1040	Overlap
Chr 14	5249257	5250528	+	DUX4	0	1277	-	1121	Overlap
Chr 14	5256582	5257806	+	DUX4	0	1277	-	1097	Overlap
Chr 14	5271551	5272820	+	DUX4	0	1277	-	1124	Overlap
Chr 14	5278121	5278990	+	DUX4	398	1277	-	763	Overlap
Chr 14	5283905	5285176	+	DUX4	0	1277	+	1132	Overlap
Chr 14	5292049	5293319	+	DUX4	0	1277	+	1131	Overlap
Chr 14	5299780	5301050	+	DUX4	0	1277	+	1132	Overlap
Chr 14	5305810	5307081	+	DUX4	0	1277	+	1137	Overlap
Chr 14	5318291	5319559	+	DUX4	0	1277	+	1150	Overlap
Chr 14	5323187	5324451	+	DUX4	1	1277	-	1143	Overlap
Chr 14	5337339	5338610	+	DUX4	0	1277	-	1120	Overlap
Chr 14	5349508	5350778	+	DUX4	0	1277	-	1128	Overlap
Chr 14	5360568	5361838	+	DUX4	0	1276	-	1141	Overlap
Chr 14	5371031	5372301	+	DUX4	0	1276	-	1133	Overlap
Chr 14	5380938	5382209	+	DUX4	0	1277	-	1129	Overlap
Chr 14	5388347	5389215	+	DUX4	398	1276	+	750	Overlap
Chr 14	5395537	5396759	+	DUX4	0	1277	+	1098	Overlap
Chr 14	5401711	5402975	+	DUX4	1	1276	+	1132	Overlap
Chr 14	5407096	5407458	+	DUX4	908	1277	-	333	Overlap
Chr 14	5411483	5411929	+	DUX4	224	670	-	395	Unique
Chr 14	5415915	5417182	+	DUX4	0	1277	+	1140	Overlap
Chr 14	6559656	6560399	+	DUX4	499	1270	+	600	Unique
Chr 14	9532582	9533323	+	DUX4	500	1270	+	599	Unique
Chr 14	9885812	9886569	+	DUX4	500	1277	+	611	Unique
Chr 14	9973565	9974308	+	DUX4	499	1270	-	600	Unique
Chr 15	935539	936809	+	DUX4	0	1277	-	1150	Overlap
Chr 15	947805	949054	+	DUX4	0	1277	-	1121	Overlap
Chr 15	954764	956033	+	DUX4	3	1277	-	1131	Overlap
Chr 15	960661	961932	+	DUX4	0	1277	-	1141	Overlap
Chr 15	968534	969768	+	DUX4	0	1277	-	1100	Overlap
Chr 15	979146	980417	+	DUX4	0	1277	-	1134	Overlap
Chr 15	987705	988975	+	DUX4	0	1277	-	1151	Overlap
Chr 15	1000273	1000655	+	DUX4	865	1277	+	346	Overlap
Chr 15	1005362	1006429	+	DUX4	1	1074	+	953	Overlap
Chr 15	1006652	1007923	+	DUX4	0	1277	-	1146	Overlap
Chr 15	1024820	1026074	+	DUX4	0	1277	-	1101	Overlap
Chr 15	1031723	1032993	+	DUX4	0	1277	-	1150	Overlap
Chr 15	1043384	1044277	+	DUX4	0	1276	-	784	Overlap
Chr 15	1054218	1055489	+	DUX4	0	1277	-	1135	Overlap
Chr 15	1063334	1064042	+	DUX4	557	1276	-	622	Overlap
Chr 15	1072047	1073306	+	DUX4	0	1277	+	1139	Overlap
Chr 15	1079163	1080433	+	DUX4	0	1277	+	1150	Overlap
Chr 15	1082407	1083676	+	DUX4	0	1277	+	1127	Overlap
Chr 15	1093801	1095072	+	DUX4	0	1276	+	1133	Overlap
Chr 15	1546770	1548042	+	DUX4	0	1277	+	1158	Overlap
Chr 15	1556308	1556839	+	DUX4	0	530	+	470	Overlap
Chr 15	4989242	4990514	+	DUX4	0	1277	-	1149	Overlap
Chr 15	4995212	4996483	+	DUX4	0	1277	-	1162	Overlap
Chr 15	5004032	5005245	+	DUX4	0	1276	-	1098	Overlap
Chr 15	5011298	5012539	+	DUX4	0	1277	-	1102	Overlap
Chr 15	5019076	5020246	+	DUX4	0	1277	-	1050	Overlap
Chr 15	5022885	5023899	+	DUX4	255	1277	+	903	Overlap
Chr 15	5029115	5030381	+	DUX4	0	1277	+	1132	Overlap
Chr 15	5038620	5039879	+	DUX4	1	1276	+	1120	Overlap
Chr 15	5048569	5049837	+	DUX4	0	1277	-	1138	Overlap
Chr 15	5055356	5056227	+	DUX4	398	1277	+	763	Overlap
Chr 15	5059922	5061157	+	DUX4	0	1277	-	1105	Overlap
Chr 15	5066341	5066662	+	DUX4	0	321	-	286	Overlap
Chr 15	5068450	5069680	+	DUX4	0	1245	-	1102	Overlap
Chr 15	5075816	5077092	+	DUX4	0	1277	-	1143	Overlap
Chr 15	5084675	5085944	+	DUX4	0	1277	-	1134	Overlap
Chr 15	5092325	5093201	+	DUX4	394	1277	-	783	Overlap
Chr 15	5096425	5097698	+	DUX4	0	1277	+	1138	Overlap
Chr 15	5101646	5102915	+	DUX4	0	1276	+	1143	Overlap
Chr 15	5106971	5108237	+	DUX4	1	1276	-	1137	Overlap
Chr 15	5112911	5114133	+	DUX4	0	1277	-	1098	Overlap
Chr 15	5122308	5123578	+	DUX4	0	1277	-	1144	Overlap
Chr 15	5134158	5135427	+	DUX4	0	1276	-	1153	Overlap
Chr 15	5142282	5143554	+	DUX4	0	1277	-	1153	Overlap
Chr 15	14556513	14557241	+	DUX4	499	1270	+	585	Unique
Chr 15	15069199	15069957	+	DUX4	499	1277	-	603	Unique
Chr 20	29615122	29615864	+	DUX4	500	1270	+	602	Unique
Chr 20	29698527	29699588	+	DUX4	0	1277	-	779	Unique
Chr 20	30360204	30360955	+	DUX4	499	1270	-	613	Unique
Chr 20	31040808	31042063	+	DUX4	0	1277	-	1087	Unique
Chr 20	31078183	31078977	+	DUX4	499	1277	-	610	Unique
Chr 20	31389165	31389925	+	DUX4	499	1277	+	608	Unique
Chr 20	31506103	31506831	+	DUX4	499	1270	-	584	Unique
Chr 21	522561	523810	+	DUX4	0	1277	-	1115	Overlap
Chr 21	529638	530906	+	DUX4	3	1277	-	1133	Overlap
Chr 21	535535	536806	+	DUX4	0	1277	-	1136	Overlap
Chr 21	543404	544638	+	DUX4	0	1277	-	1103	Overlap
Chr 21	553935	555206	+	DUX4	0	1277	-	1135	Overlap
Chr 21	562690	563960	+	DUX4	0	1277	-	1154	Overlap
Chr 21	966019	967268	+	DUX4	0	1277	-	1115	Overlap
Chr 21	973160	974428	+	DUX4	3	1277	-	1135	Overlap
Chr 21	979057	980328	+	DUX4	0	1277	-	1134	Overlap
Chr 21	986925	988159	+	DUX4	0	1277	-	1104	Overlap
Chr 21	995023	996294	+	DUX4	0	1277	-	1141	Overlap
Chr 21	1002417	1003687	+	DUX4	0	1277	-	1157	Overlap
Chr 21	1014921	1015326	+	DUX4	865	1277	+	364	Overlap
Chr 21	1020101	1021168	+	DUX4	1	1074	+	953	Overlap
Chr 21	1021391	1022662	+	DUX4	0	1277	-	1146	Overlap
Chr 21	1032080	1033349	+	DUX4	0	1277	-	1143	Overlap
Chr 21	1044220	1045474	+	DUX4	0	1277	-	1108	Overlap
Chr 21	1051189	1052459	+	DUX4	0	1277	-	1159	Overlap
Chr 21	1062850	1063743	+	DUX4	0	1276	-	786	Overlap
Chr 21	1073684	1074955	+	DUX4	0	1277	-	1137	Overlap
Chr 21	1082800	1083508	+	DUX4	557	1276	-	622	Overlap
Chr 21	1091597	1092856	+	DUX4	0	1277	+	1142	Overlap
Chr 21	1098713	1099983	+	DUX4	0	1277	+	1146	Overlap
Chr 21	1101957	1103226	+	DUX4	0	1277	+	1128	Overlap
Chr 21	1113351	1114622	+	DUX4	0	1276	+	1134	Overlap
Chr 21	1965956	1967228	+	DUX4	0	1277	+	1154	Overlap
Chr 21	1975426	1975957	+	DUX4	0	530	+	469	Overlap
Chr 21	2574260	2575055	+	DUX4	499	1276	-	614	Unique
Chr 21	6028399	6029670	+	DUX4	0	1277	-	1144	Overlap
Chr 21	6034354	6035625	+	DUX4	0	1277	-	1134	Overlap
Chr 21	6043999	6045266	+	DUX4	0	1276	-	1138	Overlap
Chr 21	6054860	6055886	+	DUX4	239	1277	-	907	Overlap
Chr 21	6058922	6060189	+	DUX4	0	1277	-	1139	Overlap
Chr 21	6064523	6064969	+	DUX4	224	670	+	399	Unique
Chr 21	6069684	6070954	+	DUX4	0	1277	+	1146	Overlap
Chr 21	6074805	6076069	+	DUX4	1	1276	-	1126	Overlap
Chr 21	6081107	6081977	+	DUX4	398	1276	-	757	Overlap
Chr 21	6087163	6088434	+	DUX4	0	1277	+	1128	Overlap
Chr 21	6094691	6095961	+	DUX4	0	1276	+	1136	Overlap
Chr 21	6107936	6109206	+	DUX4	0	1277	+	1130	Overlap
Chr 21	6116421	6117692	+	DUX4	0	1277	+	1133	Overlap
Chr 21	6126220	6127456	+	DUX4	1	1277	+	1109	Overlap
Chr 21	6131014	6132282	+	DUX4	0	1277	-	1142	Overlap
Chr 21	6139420	6140692	+	DUX4	0	1277	-	1135	Overlap
Chr 21	6145871	6147141	+	DUX4	0	1277	-	1133	Overlap
Chr 21	6153664	6154934	+	DUX4	0	1277	-	1124	Overlap
Chr 21	6161805	6162247	+	DUX4	829	1277	-	398	Overlap
Chr 21	6166523	6167748	+	DUX4	0	1277	-	1102	Overlap
Chr 21	6177584	6178855	+	DUX4	0	1277	-	1133	Overlap
Chr 21	6181414	6182683	+	DUX4	0	1277	-	1128	Overlap
Chr 21	6191863	6192732	+	DUX4	398	1277	+	757	Overlap
Chr 21	6199256	6200524	+	DUX4	0	1277	+	1105	Overlap
Chr 21	6214232	6214661	+	DUX4	0	429	+	388	Overlap
Chr 21	6220867	6222136	+	DUX4	0	1277	+	1139	Overlap
Chr 21	6227161	6228431	+	DUX4	0	1277	+	1139	Overlap
Chr 21	6233604	6234873	+	DUX4	1	1277	+	1125	Overlap
Chr 21	6243593	6244863	+	DUX4	0	1277	+	1135	Overlap
Chr 21	6248866	6250129	+	DUX4	1	1276	+	1124	Overlap
Chr 21	6254371	6255644	+	DUX4	0	1277	-	1126	Overlap
Chr 21	6262729	6263999	+	DUX4	0	1277	-	1137	Overlap
Chr 21	6269560	6270831	+	DUX4	0	1277	-	1149	Overlap
Chr 21	6280021	6281289	+	DUX4	0	1274	-	1129	Overlap
Chr 21	6294466	6295338	+	DUX4	398	1277	-	762	Overlap
Chr 21	6325963	6327232	+	DUX4	0	1277	-	1147	Overlap
Chr 21	8677264	8677992	+	DUX4	499	1270	+	583	Unique
Chr 21	9854967	9855710	+	DUX4	499	1270	-	602	Unique
Chr 22	1885917	1887187	+	DUX4	0	1277	-	1147	Overlap
Chr 22	1895594	1896863	+	DUX4	3	1277	-	1130	Overlap
Chr 22	1901491	1902762	+	DUX4	0	1277	-	1141	Overlap
Chr 22	1909363	1910597	+	DUX4	0	1277	-	1102	Overlap
Chr 22	1919894	1921165	+	DUX4	0	1277	-	1135	Overlap
Chr 22	1928659	1929929	+	DUX4	0	1277	-	1154	Overlap
Chr 22	2242832	2244081	+	DUX4	0	1277	-	1115	Overlap
Chr 22	2249975	2251243	+	DUX4	3	1277	-	1134	Overlap
Chr 22	2255872	2257143	+	DUX4	0	1277	-	1132	Overlap
Chr 22	2263741	2264975	+	DUX4	0	1277	-	1105	Overlap
Chr 22	2271839	2273110	+	DUX4	0	1277	-	1141	Overlap
Chr 22	2279233	2280503	+	DUX4	0	1277	-	1157	Overlap
Chr 22	2291737	2292142	+	DUX4	865	1277	+	364	Overlap
Chr 22	2296849	2297916	+	DUX4	1	1074	+	952	Overlap
Chr 22	2298139	2299410	+	DUX4	0	1277	-	1147	Overlap
Chr 22	2308897	2310166	+	DUX4	0	1277	-	1145	Overlap
Chr 22	2321037	2322291	+	DUX4	0	1277	-	1105	Overlap
Chr 22	2328008	2329278	+	DUX4	0	1277	-	1157	Overlap
Chr 22	2340560	2341831	+	DUX4	0	1277	-	1140	Overlap
Chr 22	2351832	2352540	+	DUX4	557	1276	-	618	Overlap
Chr 22	2360634	2361879	+	DUX4	0	1277	+	1129	Overlap
Chr 22	2368400	2369670	+	DUX4	0	1277	+	1151	Overlap
Chr 22	2371645	2372914	+	DUX4	0	1277	+	1126	Overlap
Chr 22	2383996	2385264	+	DUX4	0	1274	+	1141	Overlap
Chr 22	3515548	3516820	+	DUX4	0	1277	+	1158	Overlap
Chr 22	3525086	3525617	+	DUX4	0	530	+	471	Overlap
Chr 22	4313496	4314288	+	DUX4	499	1276	-	605	Unique
Chr 22	6013659	6014931	+	DUX4	0	1277	-	1150	Overlap
Chr 22	6019628	6020899	+	DUX4	0	1277	-	1160	Overlap
Chr 22	6026876	6028090	+	DUX4	0	1276	-	1105	Overlap
Chr 22	6030040	6031309	+	DUX4	0	1277	-	1140	Overlap
Chr 22	6039836	6041107	+	DUX4	0	1277	-	1125	Overlap
Chr 22	6047480	6048749	+	DUX4	0	1277	-	1152	Overlap
Chr 22	6060063	6061334	+	DUX4	0	1277	+	1155	Overlap
Chr 22	6064167	6065437	+	DUX4	0	1277	+	1139	Overlap
Chr 22	6075025	6076296	+	DUX4	0	1277	+	1135	Overlap
Chr 22	6081451	6082721	+	DUX4	0	1277	+	1150	Overlap
Chr 22	6091365	6092624	+	DUX4	0	1277	+	1114	Overlap
Chr 22	6101204	6102462	+	DUX4	1	1266	+	1123	Overlap
Chr 22	6124967	6126236	+	DUX4	0	1277	+	1146	Overlap
Chr 22	6139033	6140299	+	DUX4	3	1277	-	1142	Overlap
Chr 22	6150116	6151387	+	DUX4	0	1277	-	1155	Overlap
Chr 22	6155197	6156446	+	DUX4	0	1277	-	1125	Overlap
Chr 22	6182733	6183058	+	DUX4	0	325	+	294	Overlap
Chr 22	6183046	6183518	+	DUX4	0	472	-	436	Overlap
Chr 22	6193244	6194514	+	DUX4	0	1277	-	1152	Overlap
Chr 22	6196946	6197319	+	DUX4	0	374	-	344	Overlap
Chr 22	6205014	6206295	+	DUX4	0	1277	-	1155	Overlap
Chr 22	6211547	6212474	+	DUX4	355	1277	+	797	Overlap
Chr 22	6218548	6219818	+	DUX4	0	1277	+	1150	Overlap
Chr 22	6227161	6228430	+	DUX4	0	1277	+	1151	Overlap
Chr 22	6235250	6236521	+	DUX4	0	1277	+	1166	Overlap
Chr 22	7871656	7872924	+	DUX4	2	1276	-	1137	Overlap
Chr 22	7884827	7886096	+	DUX4	0	1277	-	1130	Overlap
Chr 22	7888071	7889341	+	DUX4	0	1277	-	1151	Overlap
Chr 22	7905771	7907041	+	DUX4	0	1277	+	1160	Overlap
Chr 22	7913713	7914984	+	DUX4	0	1277	+	1127	Overlap
Chr 22	7924165	7925399	+	DUX4	0	1277	+	1107	Overlap
Chr 22	7929479	7930751	+	DUX4	0	1277	+	1127	Overlap
Chr 22	7935379	7936648	+	DUX4	3	1277	+	1125	Overlap
Chr 22	7942221	7943471	+	DUX4	0	1277	+	1115	Overlap
Chr 22	7952879	7954150	+	DUX4	0	1277	+	1144	Overlap
Chr 22	7964843	7966103	+	DUX4	3	1277	+	1137	Overlap
Chr 22	9317994	9319252	+	DUX4	0	1277	-	1075	Unique
Chr 22	9366159	9367429	+	DUX4	0	1277	+	1157	Overlap
Chr 22	9379651	9380193	+	DUX4	728	1277	+	494	Overlap
Chr 22	9382120	9383177	+	DUX4	0	1277	+	949	Overlap
Chr 22	9395394	9396665	+	DUX4	0	1277	+	1131	Overlap
Chr 22	9401346	9402617	+	DUX4	0	1277	+	1129	Overlap
Chr 22	9408389	9409653	+	DUX4	0	1275	+	1136	Overlap
Chr 22	9414097	9415364	+	DUX4	4	1277	-	1143	Overlap
Chr 22	9419371	9420648	+	DUX4	0	1277	-	1145	Overlap
Chr 22	9427869	9429120	+	DUX4	0	1268	-	1117	Overlap
Chr 22	9434767	9435123	+	DUX4	915	1277	-	316	Overlap
Chr 22	9436886	9438154	+	DUX4	0	1277	+	1130	Overlap
Chr 22	9447623	9448893	+	DUX4	0	1277	+	1147	Overlap
Chr 22	9452425	9453695	+	DUX4	0	1276	+	1134	Overlap
Chr 22	9456241	9457360	+	DUX4	151	1277	+	1001	Overlap
Chr 22	9464427	9465294	+	DUX4	0	1276	+	755	Overlap
Chr 22	9470256	9470818	+	DUX4	0	562	+	513	Overlap
Chr 22	9471178	9472448	+	DUX4	0	1277	-	1145	Overlap
Chr 22	9478698	9479987	+	DUX4	0	1277	-	1139	Overlap
Chr 22	9485369	9486636	+	DUX4	0	1276	-	1139	Overlap
Chr 22	9490716	9491994	+	DUX4	0	1277	-	1137	Overlap
Chr 22	9496657	9497357	+	DUX4	0	699	-	624	Overlap
Chr 22	9498919	9499275	+	DUX4	915	1277	+	314	Overlap
Chr 22	9510514	9511321	+	DUX4	0	808	+	723	Overlap
Chr 22	9511637	9511972	+	DUX4	231	566	-	297	Unique
Chr 22	9514448	9515718	+	DUX4	0	1277	-	1147	Overlap
Chr 22	9542879	9544150	+	DUX4	0	1277	+	1132	Overlap
Chr 22	9556165	9557431	+	DUX4	0	1277	-	1138	Overlap
Chr 22	9563217	9563746	+	DUX4	731	1277	-	447	Overlap
Chr 22	9564276	9565547	+	DUX4	0	1277	+	1127	Overlap
Chr 22	9573716	9574932	+	DUX4	0	1277	+	1086	Overlap
Chr 22	9583104	9584362	+	DUX4	0	1275	+	1127	Overlap
Chr 22	9596621	9597893	+	DUX4	0	1277	+	1161	Overlap
Chr 22	9606344	9607612	+	DUX4	2	1277	+	1147	Overlap
Chr 22	9613666	9614935	+	DUX4	0	1277	+	1144	Overlap
Chr 22	9633834	9635103	+	DUX4	0	1277	+	1133	Overlap
Chr 22	9640130	9641399	+	DUX4	0	1277	+	1143	Overlap
Chr 22	9649614	9650886	+	DUX4	0	1277	-	1152	Overlap
Chr 22	9655366	9656636	+	DUX4	0	1277	-	1148	Overlap
Chr 22	9664543	9665812	+	DUX4	0	1275	-	1146	Overlap
Chr 22	9667352	9667708	+	DUX4	915	1277	+	313	Overlap
Chr 22	9676205	9677298	+	DUX4	0	1100	+	972	Overlap
Chr 22	9679001	9680270	+	DUX4	0	1277	+	1144	Overlap
Chr 22	9684614	9685671	+	DUX4	0	1074	+	915	Overlap
Chr 22	12283836	12284576	+	DUX4	500	1270	+	596	Unique
Chr 22	12411565	12412325	+	DUX4	499	1277	-	610	Unique
Chr 22	12583262	12584018	+	DUX4	500	1277	+	612	Unique
Chr 22	12671295	12672038	+	DUX4	499	1270	-	601	Unique
Chr 3	75722121	75723378	+	DUX4	0	1277	+	1134	Overlap
Chr 3	95378227	95379499	+	DUX4	0	1277	+	1157	Overlap
Chr 3	95387765	95388296	+	DUX4	0	530	+	470	Overlap
Chr 4	193389625	193390883	+	DUX4	0	1270	-	1209	Overlap
Chr 4	193433357	193434039	+	DUX4	589	1277	+	679	Overlap
Chr 4	193436059	193437336	+	DUX4	0	1277	+	1276	Overlap
Chr 4	193439355	193440632	+	DUX4	0	1277	+	1276	Overlap
Chr 4	193442652	193443929	+	DUX4	0	1277	+	1275	Overlap
Chr 4	193445948	193447225	+	DUX4	0	1277	+	1276	Overlap
Chr 4	193449244	193450521	+	DUX4	0	1277	+	1277	Overlap
Chr 4	193452540	193453817	+	DUX4	0	1277	+	1277	Overlap
Chr 4	193455845	193457122	+	DUX4	0	1277	+	1276	Overlap
Chr 4	193459139	193460416	+	DUX4	0	1277	+	1276	Overlap
Chr 4	193462437	193463714	+	DUX4	0	1277	+	1276	Overlap
Chr 4	193465733	193467010	+	DUX4	0	1277	+	1277	Overlap
Chr 4	193469036	193470313	+	DUX4	0	1277	+	1277	Overlap
Chr 4	193472332	193473609	+	DUX4	0	1277	+	1277	Overlap
Chr 4	193475627	193476904	+	DUX4	0	1277	+	1275	Overlap
Chr 4	193478924	193480201	+	DUX4	0	1277	+	1276	Overlap
Chr 4	193482217	193483494	+	DUX4	0	1277	+	1277	Overlap
Chr 4	193485516	193486793	+	DUX4	0	1277	+	1276	Overlap
Chr 4	193488814	193490091	+	DUX4	0	1277	+	1277	Overlap
Chr 4	193492114	193493391	+	DUX4	0	1277	+	1277	Overlap
Chr 4	193495414	193496691	+	DUX4	0	1277	+	1276	Overlap
Chr 4	193498711	193499988	+	DUX4	0	1277	+	1277	Overlap
Chr 4	193502009	193503286	+	DUX4	0	1277	+	1277	Overlap
Chr 4	193505305	193506582	+	DUX4	0	1277	+	1277	Overlap
Chr 4	193508602	193509879	+	DUX4	0	1277	+	1276	Overlap
Chr 4	193511899	193513176	+	DUX4	0	1277	+	1277	Overlap
Chr 4	193515197	193516474	+	DUX4	0	1277	+	1277	Overlap
Chr 4	193518495	193519772	+	DUX4	0	1277	+	1277	Overlap
Chr 4	193521791	193523068	+	DUX4	0	1277	+	1276	Overlap
Chr 4	193525088	193526365	+	DUX4	0	1277	+	1275	Overlap
Chr 4	193528384	193529661	+	DUX4	0	1277	+	1276	Overlap
Chr 4	193531681	193532958	+	DUX4	0	1277	+	1277	Overlap
Chr 4	193534977	193536254	+	DUX4	0	1277	+	1277	Overlap
Chr 4	193538283	193539560	+	DUX4	0	1277	+	1277	Overlap
Chr 4	193541578	193542855	+	DUX4	0	1277	+	1277	Overlap
Chr 5	50007600	50008871	+	DUX4	0	1277	+	1132	Overlap
Chr 9	40759843	40760594	+	DUX4	499	1270	+	608	Unique
Chr 9	42061337	42062088	+	DUX4	499	1270	-	608	Unique
Chr 9	47737182	47737937	+	DUX4	499	1270	+	608	Unique
Chr 9	48822517	48823788	+	DUX4	0	1277	+	1125	Overlap
Chr 9	80163514	80164265	+	DUX4	499	1270	+	609	Unique
Chr 9	80372104	80372855	+	DUX4	499	1270	-	610	Unique
Chr Y	11528265	11529531	+	DUX4	0	1275	+	1148	Overlap
Chr Y	11536268	11537534	+	DUX4	0	1272	+	1132	Overlap
Chr Y	11542905	11544176	+	DUX4	0	1277	+	1138	Overlap
Chr Y	11553680	11554951	+	DUX4	0	1277	+	1176	Overlap

## Sheet: Table_S6
Supplemental Table S6: CpG density greater than 5% in 33 kb sliding windows (step size = 3.3 kb) across the T2T CHM13 v2.0 reference genome.
Chromosome	BP	% CpG	Region	Annotation
1	160574701	7.579	1	rna-TRNA_0.14Mb
1	160578001	8.07	1	rna-TRNA_0.14Mb
1	160581301	7.676	1	rna-TRNA_0.14Mb
1	160584601	8.236	1	rna-TRNA_0.14Mb
1	160587901	7.612	1	rna-TRNA_0.14Mb
1	160591201	8.239	1	rna-TRNA_0.14Mb
1	160594501	7.703	1	rna-TRNA_0.14Mb
1	160597801	8.124	1	rna-TRNA_0.14Mb
1	160601101	7.797	1	rna-TRNA_0.14Mb
1	160604401	7.918	1	rna-TRNA_0.14Mb
1	160607701	8.015	1	rna-TRNA_0.14Mb
1	160611001	7.724	1	rna-TRNA_0.14Mb
1	160614301	8.224	1	rna-TRNA_0.14Mb
1	160617601	7.612	1	rna-TRNA_0.14Mb
1	160620901	8.233	1	rna-TRNA_0.14Mb
1	160624201	7.676	1	rna-TRNA_0.14Mb
1	160627501	8.152	1	rna-TRNA_0.14Mb
1	160630801	7.803	1	rna-TRNA_0.14Mb
1	160634101	8.024	1	rna-TRNA_0.14Mb
1	160637401	8.018	1	rna-TRNA_0.14Mb
1	160640701	7.83	1	rna-TRNA_0.14Mb
1	160644001	8.206	1	rna-TRNA_0.14Mb
1	160647301	7.642	1	rna-TRNA_0.14Mb
1	160650601	8.276	1	rna-TRNA_0.14Mb
1	160653901	7.688	1	rna-TRNA_0.14Mb
1	160657201	8.194	1	rna-TRNA_0.14Mb
1	160660501	7.809	1	rna-TRNA_0.14Mb
1	160663801	8.097	1	rna-TRNA_0.14Mb
1	160667101	7.924	1	rna-TRNA_0.14Mb
1	160670401	7.839	1	rna-TRNA_0.14Mb
1	160673701	8.115	1	rna-TRNA_0.14Mb
1	160677001	7.633	1	rna-TRNA_0.14Mb
1	160680301	8.252	1	rna-TRNA_0.14Mb
1	160683601	7.627	1	rna-TRNA_0.14Mb
1	160686901	8.188	1	rna-TRNA_0.14Mb
1	160690201	7.742	1	rna-TRNA_0.14Mb
1	160693501	8.064	1	rna-TRNA_0.14Mb
1	160696801	7.818	1	rna-TRNA_0.14Mb
1	160700101	7.83	1	rna-TRNA_0.14Mb
1	160703401	7.912	1	rna-TRNA_0.14Mb
1	160706701	7.027	1	rna-TRNA_0.14Mb
1	227736301	7.07	2	RNA5S_0.25Mb
1	227739601	7.909	2	RNA5S_0.25Mb
1	227742901	8.667	2	RNA5S_0.25Mb
1	227746201	8.858	2	RNA5S_0.25Mb
1	227749501	8.864	2	RNA5S_0.25Mb
1	227752801	8.894	2	RNA5S_0.25Mb
1	227756101	8.879	2	RNA5S_0.25Mb
1	227759401	8.924	2	RNA5S_0.25Mb
1	227762701	8.903	2	RNA5S_0.25Mb
1	227766001	8.933	2	RNA5S_0.25Mb
1	227769301	8.933	2	RNA5S_0.25Mb
1	227772601	8.918	2	RNA5S_0.25Mb
1	227775901	8.939	2	RNA5S_0.25Mb
1	227779201	8.939	2	RNA5S_0.25Mb
1	227782501	8.924	2	RNA5S_0.25Mb
1	227785801	8.93	2	RNA5S_0.25Mb
1	227789101	8.918	2	RNA5S_0.25Mb
1	227792401	8.912	2	RNA5S_0.25Mb
1	227795701	8.906	2	RNA5S_0.25Mb
1	227799001	8.906	2	RNA5S_0.25Mb
1	227802301	8.888	2	RNA5S_0.25Mb
1	227805601	8.903	2	RNA5S_0.25Mb
1	227808901	8.918	2	RNA5S_0.25Mb
1	227812201	8.906	2	RNA5S_0.25Mb
1	227815501	8.921	2	RNA5S_0.25Mb
1	227818801	8.918	2	RNA5S_0.25Mb
1	227822101	8.936	2	RNA5S_0.25Mb
1	227825401	8.921	2	RNA5S_0.25Mb
1	227828701	8.961	2	RNA5S_0.25Mb
1	227832001	8.924	2	RNA5S_0.25Mb
1	227835301	8.97	2	RNA5S_0.25Mb
1	227838601	8.961	2	RNA5S_0.25Mb
1	227841901	8.936	2	RNA5S_0.25Mb
1	227845201	8.933	2	RNA5S_0.25Mb
1	227848501	8.93	2	RNA5S_0.25Mb
1	227851801	8.9	2	RNA5S_0.25Mb
1	227855101	8.924	2	RNA5S_0.25Mb
1	227858401	8.903	2	RNA5S_0.25Mb
1	227861701	8.891	2	RNA5S_0.25Mb
1	227865001	8.906	2	RNA5S_0.25Mb
1	227868301	8.882	2	RNA5S_0.25Mb
1	227871601	8.891	2	RNA5S_0.25Mb
1	227874901	8.882	2	RNA5S_0.25Mb
1	227878201	8.903	2	RNA5S_0.25Mb
1	227881501	8.906	2	RNA5S_0.25Mb
1	227884801	8.933	2	RNA5S_0.25Mb
1	227888101	8.909	2	RNA5S_0.25Mb
1	227891401	8.952	2	RNA5S_0.25Mb
1	227894701	8.924	2	RNA5S_0.25Mb
1	227898001	8.942	2	RNA5S_0.25Mb
1	227901301	8.942	2	RNA5S_0.25Mb
1	227904601	8.936	2	RNA5S_0.25Mb
1	227907901	8.948	2	RNA5S_0.25Mb
1	227911201	8.945	2	RNA5S_0.25Mb
1	227914501	8.921	2	RNA5S_0.25Mb
1	227917801	8.93	2	RNA5S_0.25Mb
1	227921101	8.906	2	RNA5S_0.25Mb
1	227924401	8.906	2	RNA5S_0.25Mb
1	227927701	8.9	2	RNA5S_0.25Mb
1	227931001	8.891	2	RNA5S_0.25Mb
1	227934301	8.891	2	RNA5S_0.25Mb
1	227937601	8.882	2	RNA5S_0.25Mb
1	227940901	8.903	2	RNA5S_0.25Mb
1	227944201	8.906	2	RNA5S_0.25Mb
1	227947501	8.915	2	RNA5S_0.25Mb
1	227950801	8.903	2	RNA5S_0.25Mb
1	227954101	8.942	2	RNA5S_0.25Mb
1	227957401	8.903	2	RNA5S_0.25Mb
1	227960701	8.93	2	RNA5S_0.25Mb
1	227964001	8.921	2	RNA5S_0.25Mb
1	227967301	8.915	2	RNA5S_0.25Mb
1	227970601	8.936	2	RNA5S_0.25Mb
1	227973901	8.93	2	RNA5S_0.25Mb
1	227977201	8.909	2	RNA5S_0.25Mb
1	227980501	8.927	2	RNA5S_0.25Mb
1	227983801	8.912	2	RNA5S_0.25Mb
1	227987101	8.918	2	RNA5S_0.25Mb
1	227990401	8.921	2	RNA5S_0.25Mb
1	227993701	8.806	2	RNA5S_0.25Mb
1	227997001	8.097	2	RNA5S_0.25Mb
1	228000301	7.267	2	RNA5S_0.25Mb
4	193426201	7.879	3	D4Z4_0.1Mb
4	193429501	8.803	3	D4Z4_0.1Mb
4	193432801	9.688	3	D4Z4_0.1Mb
4	193436101	9.842	3	D4Z4_0.1Mb
4	193439401	9.848	3	D4Z4_0.1Mb
4	193442701	9.848	3	D4Z4_0.1Mb
4	193446001	9.845	3	D4Z4_0.1Mb
4	193449301	9.845	3	D4Z4_0.1Mb
4	193452601	9.845	3	D4Z4_0.1Mb
4	193455901	9.845	3	D4Z4_0.1Mb
4	193459201	9.842	3	D4Z4_0.1Mb
4	193462501	9.839	3	D4Z4_0.1Mb
4	193465801	9.839	3	D4Z4_0.1Mb
4	193469101	9.842	3	D4Z4_0.1Mb
4	193472401	9.848	3	D4Z4_0.1Mb
4	193475701	9.852	3	D4Z4_0.1Mb
4	193479001	9.855	3	D4Z4_0.1Mb
4	193482301	9.858	3	D4Z4_0.1Mb
4	193485601	9.867	3	D4Z4_0.1Mb
4	193488901	9.867	3	D4Z4_0.1Mb
4	193492201	9.861	3	D4Z4_0.1Mb
4	193495501	9.855	3	D4Z4_0.1Mb
4	193498801	9.855	3	D4Z4_0.1Mb
4	193502101	9.848	3	D4Z4_0.1Mb
4	193505401	9.839	3	D4Z4_0.1Mb
4	193508701	9.842	3	D4Z4_0.1Mb
4	193512001	9.439	3	D4Z4_0.1Mb
4	193515301	8.521	3	D4Z4_0.1Mb
4	193518601	7.588	3	D4Z4_0.1Mb
10	134607001	7.336	4	D4Z4_0.1Mb
10	134610301	8.239	4	D4Z4_0.1Mb
10	134613601	9.124	4	D4Z4_0.1Mb
10	134616901	9.752	4	D4Z4_0.1Mb
10	134620201	9.752	4	D4Z4_0.1Mb
10	134623501	9.748	4	D4Z4_0.1Mb
10	134626801	9.736	4	D4Z4_0.1Mb
10	134630101	9.739	4	D4Z4_0.1Mb
10	134633401	9.742	4	D4Z4_0.1Mb
10	134636701	9.745	4	D4Z4_0.1Mb
10	134640001	9.742	4	D4Z4_0.1Mb
10	134643301	9.742	4	D4Z4_0.1Mb
10	134646601	9.739	4	D4Z4_0.1Mb
10	134649901	9.742	4	D4Z4_0.1Mb
10	134653201	9.739	4	D4Z4_0.1Mb
10	134656501	9.739	4	D4Z4_0.1Mb
10	134659801	9.752	4	D4Z4_0.1Mb
10	134663101	9.752	4	D4Z4_0.1Mb
10	134666401	9.752	4	D4Z4_0.1Mb
10	134669701	9.745	4	D4Z4_0.1Mb
10	134673001	9.745	4	D4Z4_0.1Mb
10	134676301	9.739	4	D4Z4_0.1Mb
10	134679601	9.736	4	D4Z4_0.1Mb
10	134682901	9.721	4	D4Z4_0.1Mb
10	134686201	9.727	4	D4Z4_0.1Mb
10	134689501	9.724	4	D4Z4_0.1Mb
10	134692801	9.718	4	D4Z4_0.1Mb
10	134696101	8.994	4	D4Z4_0.1Mb
10	134699401	8.097	4	D4Z4_0.1Mb
10	134702701	7.209	4	D4Z4_0.1Mb
13	5755201	7.727	5	RNA45S1-1_3.5Mb
13	5758501	8.382	5	RNA45S1-1_3.5Mb
13	5761801	8.848	5	RNA45S1-1_3.5Mb
13	5765101	8.982	5	RNA45S1-1_3.5Mb
13	5768401	8.915	5	RNA45S1-1_3.5Mb
13	5771701	8.697	5	RNA45S1-1_3.5Mb
13	5775001	8.085	5	RNA45S1-1_3.5Mb
13	5801401	7.885	5	RNA45S1-1_3.5Mb
13	5804701	8.864	5	RNA45S1-1_3.5Mb
13	5808001	9.03	5	RNA45S1-1_3.5Mb
13	5811301	9.255	5	RNA45S1-1_3.5Mb
13	5814601	9.048	5	RNA45S1-1_3.5Mb
13	5817901	8.748	5	RNA45S1-1_3.5Mb
13	5821201	8.385	5	RNA45S1-1_3.5Mb
13	5824501	7.094	5	RNA45S1-1_3.5Mb
13	5847601	7.715	5	RNA45S1-1_3.5Mb
13	5850901	8.67	5	RNA45S1-1_3.5Mb
13	5854201	8.945	5	RNA45S1-1_3.5Mb
13	5857501	9.236	5	RNA45S1-1_3.5Mb
13	5860801	9.052	5	RNA45S1-1_3.5Mb
13	5864101	8.848	5	RNA45S1-1_3.5Mb
13	5867401	8.591	5	RNA45S1-1_3.5Mb
13	5870701	7.455	5	RNA45S1-1_3.5Mb
13	5893801	7.652	5	RNA45S1-1_3.5Mb
13	5897101	8.467	5	RNA45S1-1_3.5Mb
13	5900401	8.942	5	RNA45S1-1_3.5Mb
13	5903701	9.209	5	RNA45S1-1_3.5Mb
13	5907001	9.115	5	RNA45S1-1_3.5Mb
13	5910301	8.948	5	RNA45S1-1_3.5Mb
13	5913601	8.576	5	RNA45S1-1_3.5Mb
13	5916901	7.709	5	RNA45S1-1_3.5Mb
13	5940001	7.258	5	RNA45S1-1_3.5Mb
13	5943301	8.27	5	RNA45S1-1_3.5Mb
13	5946601	8.955	5	RNA45S1-1_3.5Mb
13	5949901	9.197	5	RNA45S1-1_3.5Mb
13	5953201	9.179	5	RNA45S1-1_3.5Mb
13	5956501	9.064	5	RNA45S1-1_3.5Mb
13	5959801	8.688	5	RNA45S1-1_3.5Mb
13	5963101	7.988	5	RNA45S1-1_3.5Mb
13	5989501	7.97	5	RNA45S1-1_3.5Mb
13	5992801	8.897	5	RNA45S1-1_3.5Mb
13	5996101	9.097	5	RNA45S1-1_3.5Mb
13	5999401	9.221	5	RNA45S1-1_3.5Mb
13	6002701	9.036	5	RNA45S1-1_3.5Mb
13	6006001	8.733	5	RNA45S1-1_3.5Mb
13	6009301	8.336	5	RNA45S1-1_3.5Mb
13	6035701	7.724	5	RNA45S1-1_3.5Mb
13	6039001	8.685	5	RNA45S1-1_3.5Mb
13	6042301	8.942	5	RNA45S1-1_3.5Mb
13	6045601	9.258	5	RNA45S1-1_3.5Mb
13	6048901	9.052	5	RNA45S1-1_3.5Mb
13	6052201	8.812	5	RNA45S1-1_3.5Mb
13	6055501	8.545	5	RNA45S1-1_3.5Mb
13	6058801	7.361	5	RNA45S1-1_3.5Mb
13	6081901	7.667	5	RNA45S1-1_3.5Mb
13	6085201	8.5	5	RNA45S1-1_3.5Mb
13	6088501	8.924	5	RNA45S1-1_3.5Mb
13	6091801	9.209	5	RNA45S1-1_3.5Mb
13	6095101	9.097	5	RNA45S1-1_3.5Mb
13	6098401	8.912	5	RNA45S1-1_3.5Mb
13	6101701	8.612	5	RNA45S1-1_3.5Mb
13	6105001	7.612	5	RNA45S1-1_3.5Mb
13	6128101	7.345	5	RNA45S1-1_3.5Mb
13	6131401	8.285	5	RNA45S1-1_3.5Mb
13	6134701	8.924	5	RNA45S1-1_3.5Mb
13	6138001	9.224	5	RNA45S1-1_3.5Mb
13	6141301	9.161	5	RNA45S1-1_3.5Mb
13	6144601	9.027	5	RNA45S1-1_3.5Mb
13	6147901	8.661	5	RNA45S1-1_3.5Mb
13	6151201	7.879	5	RNA45S1-1_3.5Mb
13	6174301	7.106	5	RNA45S1-1_3.5Mb
13	6177601	8.082	5	RNA45S1-1_3.5Mb
13	6180901	8.912	5	RNA45S1-1_3.5Mb
13	6184201	9.112	5	RNA45S1-1_3.5Mb
13	6187501	9.215	5	RNA45S1-1_3.5Mb
13	6190801	9.058	5	RNA45S1-1_3.5Mb
13	6194101	8.709	5	RNA45S1-1_3.5Mb
13	6197401	8.236	5	RNA45S1-1_3.5Mb
13	6223801	7.776	5	RNA45S1-1_3.5Mb
13	6227101	8.779	5	RNA45S1-1_3.5Mb
13	6230401	8.961	5	RNA45S1-1_3.5Mb
13	6233701	9.276	5	RNA45S1-1_3.5Mb
13	6237001	9.07	5	RNA45S1-1_3.5Mb
13	6240301	8.776	5	RNA45S1-1_3.5Mb
13	6243601	8.473	5	RNA45S1-1_3.5Mb
13	6246901	7.248	5	RNA45S1-1_3.5Mb
13	6270001	7.661	5	RNA45S1-1_3.5Mb
13	6273301	8.561	5	RNA45S1-1_3.5Mb
13	6276601	8.918	5	RNA45S1-1_3.5Mb
13	6279901	9.203	5	RNA45S1-1_3.5Mb
13	6283201	9.073	5	RNA45S1-1_3.5Mb
13	6286501	8.885	5	RNA45S1-1_3.5Mb
13	6289801	8.636	5	RNA45S1-1_3.5Mb
13	6293101	7.533	5	RNA45S1-1_3.5Mb
13	6316201	7.467	5	RNA45S1-1_3.5Mb
13	6319501	8.373	5	RNA45S1-1_3.5Mb
13	6322801	8.915	5	RNA45S1-1_3.5Mb
13	6326101	9.233	5	RNA45S1-1_3.5Mb
13	6329401	9.142	5	RNA45S1-1_3.5Mb
13	6332701	8.985	5	RNA45S1-1_3.5Mb
13	6336001	8.624	5	RNA45S1-1_3.5Mb
13	6339301	7.797	5	RNA45S1-1_3.5Mb
13	6362401	7.158	5	RNA45S1-1_3.5Mb
13	6365701	8.197	5	RNA45S1-1_3.5Mb
13	6369001	8.933	5	RNA45S1-1_3.5Mb
13	6372301	9.136	5	RNA45S1-1_3.5Mb
13	6375601	9.206	5	RNA45S1-1_3.5Mb
13	6378901	9.058	5	RNA45S1-1_3.5Mb
13	6382201	8.697	5	RNA45S1-1_3.5Mb
13	6385501	8.133	5	RNA45S1-1_3.5Mb
13	6411901	7.821	5	RNA45S1-1_3.5Mb
13	6415201	8.858	5	RNA45S1-1_3.5Mb
13	6418501	8.994	5	RNA45S1-1_3.5Mb
13	6421801	9.27	5	RNA45S1-1_3.5Mb
13	6425101	9.061	5	RNA45S1-1_3.5Mb
13	6428401	8.745	5	RNA45S1-1_3.5Mb
13	6431701	8.412	5	RNA45S1-1_3.5Mb
13	6435001	7.155	5	RNA45S1-1_3.5Mb
13	6458101	7.706	5	RNA45S1-1_3.5Mb
13	6461401	8.655	5	RNA45S1-1_3.5Mb
13	6464701	8.924	5	RNA45S1-1_3.5Mb
13	6468001	9.215	5	RNA45S1-1_3.5Mb
13	6471301	9.055	5	RNA45S1-1_3.5Mb
13	6474601	8.848	5	RNA45S1-1_3.5Mb
13	6477901	8.624	5	RNA45S1-1_3.5Mb
13	6481201	7.479	5	RNA45S1-1_3.5Mb
13	6504301	7.6	5	RNA45S1-1_3.5Mb
13	6507601	8.461	5	RNA45S1-1_3.5Mb
13	6510901	8.933	5	RNA45S1-1_3.5Mb
13	6514201	9.227	5	RNA45S1-1_3.5Mb
13	6517501	9.127	5	RNA45S1-1_3.5Mb
13	6520801	8.958	5	RNA45S1-1_3.5Mb
13	6524101	8.588	5	RNA45S1-1_3.5Mb
13	6527401	7.755	5	RNA45S1-1_3.5Mb
13	6550501	7.233	5	RNA45S1-1_3.5Mb
13	6553801	8.248	5	RNA45S1-1_3.5Mb
13	6557101	8.945	5	RNA45S1-1_3.5Mb
13	6560401	9.17	5	RNA45S1-1_3.5Mb
13	6563701	9.188	5	RNA45S1-1_3.5Mb
13	6567001	9.07	5	RNA45S1-1_3.5Mb
13	6570301	8.685	5	RNA45S1-1_3.5Mb
13	6573601	8.03	5	RNA45S1-1_3.5Mb
13	6600001	7.921	5	RNA45S1-1_3.5Mb
13	6603301	8.876	5	RNA45S1-1_3.5Mb
13	6606601	9.067	5	RNA45S1-1_3.5Mb
13	6609901	9.224	5	RNA45S1-1_3.5Mb
13	6613201	9.033	5	RNA45S1-1_3.5Mb
13	6616501	8.748	5	RNA45S1-1_3.5Mb
13	6619801	8.358	5	RNA45S1-1_3.5Mb
13	6623101	7.012	5	RNA45S1-1_3.5Mb
13	6646201	7.73	5	RNA45S1-1_3.5Mb
13	6649501	8.679	5	RNA45S1-1_3.5Mb
13	6652801	8.958	5	RNA45S1-1_3.5Mb
13	6656101	9.255	5	RNA45S1-1_3.5Mb
13	6659401	9.042	5	RNA45S1-1_3.5Mb
13	6662701	8.83	5	RNA45S1-1_3.5Mb
13	6666001	8.57	5	RNA45S1-1_3.5Mb
13	6669301	7.406	5	RNA45S1-1_3.5Mb
13	6692401	7.67	5	RNA45S1-1_3.5Mb
13	6695701	8.485	5	RNA45S1-1_3.5Mb
13	6699001	8.933	5	RNA45S1-1_3.5Mb
13	6702301	9.209	5	RNA45S1-1_3.5Mb
13	6705601	9.097	5	RNA45S1-1_3.5Mb
13	6708901	8.927	5	RNA45S1-1_3.5Mb
13	6712201	8.594	5	RNA45S1-1_3.5Mb
13	6715501	7.661	5	RNA45S1-1_3.5Mb
13	6738601	7.303	5	RNA45S1-1_3.5Mb
13	6741901	8.279	5	RNA45S1-1_3.5Mb
13	6745201	8.936	5	RNA45S1-1_3.5Mb
13	6748501	9.2	5	RNA45S1-1_3.5Mb
13	6751801	9.17	5	RNA45S1-1_3.5Mb
13	6755101	9.048	5	RNA45S1-1_3.5Mb
13	6758401	8.688	5	RNA45S1-1_3.5Mb
13	6761701	7.942	5	RNA45S1-1_3.5Mb
13	6784801	7.058	5	RNA45S1-1_3.5Mb
13	6788101	8.024	5	RNA45S1-1_3.5Mb
13	6791401	8.903	5	RNA45S1-1_3.5Mb
13	6794701	9.112	5	RNA45S1-1_3.5Mb
13	6798001	9.215	5	RNA45S1-1_3.5Mb
13	6801301	9.058	5	RNA45S1-1_3.5Mb
13	6804601	8.724	5	RNA45S1-1_3.5Mb
13	6807901	8.285	5	RNA45S1-1_3.5Mb
13	6834301	7.727	5	RNA45S1-1_3.5Mb
13	6837601	8.727	5	RNA45S1-1_3.5Mb
13	6840901	8.952	5	RNA45S1-1_3.5Mb
13	6844201	9.252	5	RNA45S1-1_3.5Mb
13	6847501	9.058	5	RNA45S1-1_3.5Mb
13	6850801	8.794	5	RNA45S1-1_3.5Mb
13	6854101	8.506	5	RNA45S1-1_3.5Mb
13	6857401	7.321	5	RNA45S1-1_3.5Mb
13	6880501	7.648	5	RNA45S1-1_3.5Mb
13	6883801	8.503	5	RNA45S1-1_3.5Mb
13	6887101	8.912	5	RNA45S1-1_3.5Mb
13	6890401	9.203	5	RNA45S1-1_3.5Mb
13	6893701	9.088	5	RNA45S1-1_3.5Mb
13	6897001	8.906	5	RNA45S1-1_3.5Mb
13	6900301	8.633	5	RNA45S1-1_3.5Mb
13	6903601	7.564	5	RNA45S1-1_3.5Mb
13	6926701	7.406	5	RNA45S1-1_3.5Mb
13	6930001	8.312	5	RNA45S1-1_3.5Mb
13	6933301	8.921	5	RNA45S1-1_3.5Mb
13	6936601	9.221	5	RNA45S1-1_3.5Mb
13	6939901	9.155	5	RNA45S1-1_3.5Mb
13	6943201	9.006	5	RNA45S1-1_3.5Mb
13	6946501	8.648	5	RNA45S1-1_3.5Mb
13	6949801	7.839	5	RNA45S1-1_3.5Mb
13	6972901	7.118	5	RNA45S1-1_3.5Mb
13	6976201	8.133	5	RNA45S1-1_3.5Mb
13	6979501	8.921	5	RNA45S1-1_3.5Mb
13	6982801	9.118	5	RNA45S1-1_3.5Mb
13	6986101	9.212	5	RNA45S1-1_3.5Mb
13	6989401	9.067	5	RNA45S1-1_3.5Mb
13	6992701	8.697	5	RNA45S1-1_3.5Mb
13	6996001	8.188	5	RNA45S1-1_3.5Mb
13	7022401	7.809	5	RNA45S1-1_3.5Mb
13	7025701	8.845	5	RNA45S1-1_3.5Mb
13	7029001	8.976	5	RNA45S1-1_3.5Mb
13	7032301	9.285	5	RNA45S1-1_3.5Mb
13	7035601	9.067	5	RNA45S1-1_3.5Mb
13	7038901	8.755	5	RNA45S1-1_3.5Mb
13	7042201	8.442	5	RNA45S1-1_3.5Mb
13	7045501	7.206	5	RNA45S1-1_3.5Mb
13	7068601	7.7	5	RNA45S1-1_3.5Mb
13	7071901	8.624	5	RNA45S1-1_3.5Mb
13	7075201	8.921	5	RNA45S1-1_3.5Mb
13	7078501	9.203	5	RNA45S1-1_3.5Mb
13	7081801	9.07	5	RNA45S1-1_3.5Mb
13	7085101	8.864	5	RNA45S1-1_3.5Mb
13	7088401	8.636	5	RNA45S1-1_3.5Mb
13	7091701	7.512	5	RNA45S1-1_3.5Mb
13	7114801	7.539	5	RNA45S1-1_3.5Mb
13	7118101	8.436	5	RNA45S1-1_3.5Mb
13	7121401	8.927	5	RNA45S1-1_3.5Mb
13	7124701	9.224	5	RNA45S1-1_3.5Mb
13	7128001	9.139	5	RNA45S1-1_3.5Mb
13	7131301	8.976	5	RNA45S1-1_3.5Mb
13	7134601	8.603	5	RNA45S1-1_3.5Mb
13	7137901	7.782	5	RNA45S1-1_3.5Mb
13	7161001	7.194	5	RNA45S1-1_3.5Mb
13	7164301	8.245	5	RNA45S1-1_3.5Mb
13	7167601	8.939	5	RNA45S1-1_3.5Mb
13	7170901	9.155	5	RNA45S1-1_3.5Mb
13	7174201	9.194	5	RNA45S1-1_3.5Mb
13	7177501	9.076	5	RNA45S1-1_3.5Mb
13	7180801	8.691	5	RNA45S1-1_3.5Mb
13	7184101	8.082	5	RNA45S1-1_3.5Mb
13	7210501	7.882	5	RNA45S1-1_3.5Mb
13	7213801	8.861	5	RNA45S1-1_3.5Mb
13	7217101	9.027	5	RNA45S1-1_3.5Mb
13	7220401	9.252	5	RNA45S1-1_3.5Mb
13	7223701	9.045	5	RNA45S1-1_3.5Mb
13	7227001	8.745	5	RNA45S1-1_3.5Mb
13	7230301	8.382	5	RNA45S1-1_3.5Mb
13	7233601	7.094	5	RNA45S1-1_3.5Mb
13	7256701	7.712	5	RNA45S1-1_3.5Mb
13	7260001	8.667	5	RNA45S1-1_3.5Mb
13	7263301	8.942	5	RNA45S1-1_3.5Mb
13	7266601	9.233	5	RNA45S1-1_3.5Mb
13	7269901	9.048	5	RNA45S1-1_3.5Mb
13	7273201	8.845	5	RNA45S1-1_3.5Mb
13	7276501	8.588	5	RNA45S1-1_3.5Mb
13	7279801	7.455	5	RNA45S1-1_3.5Mb
13	7302901	7.648	5	RNA45S1-1_3.5Mb
13	7306201	8.464	5	RNA45S1-1_3.5Mb
13	7309501	8.939	5	RNA45S1-1_3.5Mb
13	7312801	9.206	5	RNA45S1-1_3.5Mb
13	7316101	9.112	5	RNA45S1-1_3.5Mb
13	7319401	8.945	5	RNA45S1-1_3.5Mb
13	7322701	8.573	5	RNA45S1-1_3.5Mb
13	7326001	7.706	5	RNA45S1-1_3.5Mb
13	7349101	7.255	5	RNA45S1-1_3.5Mb
13	7352401	8.267	5	RNA45S1-1_3.5Mb
13	7355701	8.952	5	RNA45S1-1_3.5Mb
13	7359001	9.194	5	RNA45S1-1_3.5Mb
13	7362301	9.176	5	RNA45S1-1_3.5Mb
13	7365601	9.061	5	RNA45S1-1_3.5Mb
13	7368901	8.685	5	RNA45S1-1_3.5Mb
13	7372201	7.985	5	RNA45S1-1_3.5Mb
13	7398601	7.97	5	RNA45S1-1_3.5Mb
13	7401901	8.897	5	RNA45S1-1_3.5Mb
13	7405201	9.097	5	RNA45S1-1_3.5Mb
13	7408501	9.221	5	RNA45S1-1_3.5Mb
13	7411801	9.036	5	RNA45S1-1_3.5Mb
13	7415101	8.733	5	RNA45S1-1_3.5Mb
13	7418401	8.336	5	RNA45S1-1_3.5Mb
13	7444801	7.724	5	RNA45S1-1_3.5Mb
13	7448101	8.685	5	RNA45S1-1_3.5Mb
13	7451401	8.942	5	RNA45S1-1_3.5Mb
13	7454701	9.258	5	RNA45S1-1_3.5Mb
13	7458001	9.052	5	RNA45S1-1_3.5Mb
13	7461301	8.812	5	RNA45S1-1_3.5Mb
13	7464601	8.545	5	RNA45S1-1_3.5Mb
13	7467901	7.361	5	RNA45S1-1_3.5Mb
13	7491001	7.667	5	RNA45S1-1_3.5Mb
13	7494301	8.5	5	RNA45S1-1_3.5Mb
13	7497601	8.924	5	RNA45S1-1_3.5Mb
13	7500901	9.209	5	RNA45S1-1_3.5Mb
13	7504201	9.097	5	RNA45S1-1_3.5Mb
13	7507501	8.912	5	RNA45S1-1_3.5Mb
13	7510801	8.612	5	RNA45S1-1_3.5Mb
13	7514101	7.612	5	RNA45S1-1_3.5Mb
13	7537201	7.345	5	RNA45S1-1_3.5Mb
13	7540501	8.285	5	RNA45S1-1_3.5Mb
13	7543801	8.924	5	RNA45S1-1_3.5Mb
13	7547101	9.224	5	RNA45S1-1_3.5Mb
13	7550401	9.161	5	RNA45S1-1_3.5Mb
13	7553701	9.027	5	RNA45S1-1_3.5Mb
13	7557001	8.661	5	RNA45S1-1_3.5Mb
13	7560301	7.879	5	RNA45S1-1_3.5Mb
13	7583401	7.106	5	RNA45S1-1_3.5Mb
13	7586701	8.082	5	RNA45S1-1_3.5Mb
13	7590001	8.912	5	RNA45S1-1_3.5Mb
13	7593301	9.112	5	RNA45S1-1_3.5Mb
13	7596601	9.215	5	RNA45S1-1_3.5Mb
13	7599901	9.058	5	RNA45S1-1_3.5Mb
13	7603201	8.709	5	RNA45S1-1_3.5Mb
13	7606501	8.236	5	RNA45S1-1_3.5Mb
13	7632901	7.776	5	RNA45S1-1_3.5Mb
13	7636201	8.779	5	RNA45S1-1_3.5Mb
13	7639501	8.961	5	RNA45S1-1_3.5Mb
13	7642801	9.276	5	RNA45S1-1_3.5Mb
13	7646101	9.07	5	RNA45S1-1_3.5Mb
13	7649401	8.776	5	RNA45S1-1_3.5Mb
13	7652701	8.473	5	RNA45S1-1_3.5Mb
13	7656001	7.248	5	RNA45S1-1_3.5Mb
13	7679101	7.661	5	RNA45S1-1_3.5Mb
13	7682401	8.561	5	RNA45S1-1_3.5Mb
13	7685701	8.918	5	RNA45S1-1_3.5Mb
13	7689001	9.203	5	RNA45S1-1_3.5Mb
13	7692301	9.073	5	RNA45S1-1_3.5Mb
13	7695601	8.885	5	RNA45S1-1_3.5Mb
13	7698901	8.636	5	RNA45S1-1_3.5Mb
13	7702201	7.533	5	RNA45S1-1_3.5Mb
13	7725301	7.467	5	RNA45S1-1_3.5Mb
13	7728601	8.373	5	RNA45S1-1_3.5Mb
13	7731901	8.915	5	RNA45S1-1_3.5Mb
13	7735201	9.233	5	RNA45S1-1_3.5Mb
13	7738501	9.142	5	RNA45S1-1_3.5Mb
13	7741801	8.985	5	RNA45S1-1_3.5Mb
13	7745101	8.624	5	RNA45S1-1_3.5Mb
13	7748401	7.797	5	RNA45S1-1_3.5Mb
13	7771501	7.158	5	RNA45S1-1_3.5Mb
13	7774801	8.197	5	RNA45S1-1_3.5Mb
13	7778101	8.933	5	RNA45S1-1_3.5Mb
13	7781401	9.136	5	RNA45S1-1_3.5Mb
13	7784701	9.206	5	RNA45S1-1_3.5Mb
13	7788001	9.058	5	RNA45S1-1_3.5Mb
13	7791301	8.697	5	RNA45S1-1_3.5Mb
13	7794601	8.133	5	RNA45S1-1_3.5Mb
13	7821001	7.821	5	RNA45S1-1_3.5Mb
13	7824301	8.858	5	RNA45S1-1_3.5Mb
13	7827601	8.994	5	RNA45S1-1_3.5Mb
13	7830901	9.27	5	RNA45S1-1_3.5Mb
13	7834201	9.061	5	RNA45S1-1_3.5Mb
13	7837501	8.745	5	RNA45S1-1_3.5Mb
13	7840801	8.412	5	RNA45S1-1_3.5Mb
13	7844101	7.155	5	RNA45S1-1_3.5Mb
13	7867201	7.706	5	RNA45S1-1_3.5Mb
13	7870501	8.655	5	RNA45S1-1_3.5Mb
13	7873801	8.924	5	RNA45S1-1_3.5Mb
13	7877101	9.215	5	RNA45S1-1_3.5Mb
13	7880401	9.055	5	RNA45S1-1_3.5Mb
13	7883701	8.848	5	RNA45S1-1_3.5Mb
13	7887001	8.624	5	RNA45S1-1_3.5Mb
13	7890301	7.479	5	RNA45S1-1_3.5Mb
13	7913401	7.6	5	RNA45S1-1_3.5Mb
13	7916701	8.461	5	RNA45S1-1_3.5Mb
13	7920001	8.933	5	RNA45S1-1_3.5Mb
13	7923301	9.227	5	RNA45S1-1_3.5Mb
13	7926601	9.127	5	RNA45S1-1_3.5Mb
13	7929901	8.958	5	RNA45S1-1_3.5Mb
13	7933201	8.588	5	RNA45S1-1_3.5Mb
13	7936501	7.755	5	RNA45S1-1_3.5Mb
13	7959601	7.233	5	RNA45S1-1_3.5Mb
13	7962901	8.248	5	RNA45S1-1_3.5Mb
13	7966201	8.945	5	RNA45S1-1_3.5Mb
13	7969501	9.17	5	RNA45S1-1_3.5Mb
13	7972801	9.188	5	RNA45S1-1_3.5Mb
13	7976101	9.07	5	RNA45S1-1_3.5Mb
13	7979401	8.685	5	RNA45S1-1_3.5Mb
13	7982701	8.03	5	RNA45S1-1_3.5Mb
13	8009101	7.921	5	RNA45S1-1_3.5Mb
13	8012401	8.876	5	RNA45S1-1_3.5Mb
13	8015701	9.067	5	RNA45S1-1_3.5Mb
13	8019001	9.224	5	RNA45S1-1_3.5Mb
13	8022301	9.033	5	RNA45S1-1_3.5Mb
13	8025601	8.748	5	RNA45S1-1_3.5Mb
13	8028901	8.358	5	RNA45S1-1_3.5Mb
13	8032201	7.012	5	RNA45S1-1_3.5Mb
13	8055301	7.73	5	RNA45S1-1_3.5Mb
13	8058601	8.679	5	RNA45S1-1_3.5Mb
13	8061901	8.958	5	RNA45S1-1_3.5Mb
13	8065201	9.255	5	RNA45S1-1_3.5Mb
13	8068501	9.042	5	RNA45S1-1_3.5Mb
13	8071801	8.83	5	RNA45S1-1_3.5Mb
13	8075101	8.57	5	RNA45S1-1_3.5Mb
13	8078401	7.406	5	RNA45S1-1_3.5Mb
13	8101501	7.67	5	RNA45S1-1_3.5Mb
13	8104801	8.485	5	RNA45S1-1_3.5Mb
13	8108101	8.933	5	RNA45S1-1_3.5Mb
13	8111401	9.209	5	RNA45S1-1_3.5Mb
13	8114701	9.097	5	RNA45S1-1_3.5Mb
13	8118001	8.927	5	RNA45S1-1_3.5Mb
13	8121301	8.594	5	RNA45S1-1_3.5Mb
13	8124601	7.661	5	RNA45S1-1_3.5Mb
13	8147701	7.303	5	RNA45S1-1_3.5Mb
13	8151001	8.279	5	RNA45S1-1_3.5Mb
13	8154301	8.936	5	RNA45S1-1_3.5Mb
13	8157601	9.2	5	RNA45S1-1_3.5Mb
13	8160901	9.17	5	RNA45S1-1_3.5Mb
13	8164201	9.048	5	RNA45S1-1_3.5Mb
13	8167501	8.688	5	RNA45S1-1_3.5Mb
13	8170801	7.942	5	RNA45S1-1_3.5Mb
13	8193901	7.058	5	RNA45S1-1_3.5Mb
13	8197201	8.024	5	RNA45S1-1_3.5Mb
13	8200501	8.903	5	RNA45S1-1_3.5Mb
13	8203801	9.112	5	RNA45S1-1_3.5Mb
13	8207101	9.215	5	RNA45S1-1_3.5Mb
13	8210401	9.058	5	RNA45S1-1_3.5Mb
13	8213701	8.724	5	RNA45S1-1_3.5Mb
13	8217001	8.285	5	RNA45S1-1_3.5Mb
13	8243401	7.727	5	RNA45S1-1_3.5Mb
13	8246701	8.727	5	RNA45S1-1_3.5Mb
13	8250001	8.952	5	RNA45S1-1_3.5Mb
13	8253301	9.252	5	RNA45S1-1_3.5Mb
13	8256601	9.058	5	RNA45S1-1_3.5Mb
13	8259901	8.794	5	RNA45S1-1_3.5Mb
13	8263201	8.506	5	RNA45S1-1_3.5Mb
13	8266501	7.321	5	RNA45S1-1_3.5Mb
13	8289601	7.648	5	RNA45S1-1_3.5Mb
13	8292901	8.503	5	RNA45S1-1_3.5Mb
13	8296201	8.912	5	RNA45S1-1_3.5Mb
13	8299501	9.203	5	RNA45S1-1_3.5Mb
13	8302801	9.088	5	RNA45S1-1_3.5Mb
13	8306101	8.906	5	RNA45S1-1_3.5Mb
13	8309401	8.633	5	RNA45S1-1_3.5Mb
13	8312701	7.564	5	RNA45S1-1_3.5Mb
13	8335801	7.406	5	RNA45S1-1_3.5Mb
13	8339101	8.312	5	RNA45S1-1_3.5Mb
13	8342401	8.921	5	RNA45S1-1_3.5Mb
13	8345701	9.221	5	RNA45S1-1_3.5Mb
13	8349001	9.155	5	RNA45S1-1_3.5Mb
13	8352301	9.006	5	RNA45S1-1_3.5Mb
13	8355601	8.648	5	RNA45S1-1_3.5Mb
13	8358901	7.839	5	RNA45S1-1_3.5Mb
13	8382001	7.118	5	RNA45S1-1_3.5Mb
13	8385301	8.133	5	RNA45S1-1_3.5Mb
13	8388601	8.921	5	RNA45S1-1_3.5Mb
13	8391901	9.118	5	RNA45S1-1_3.5Mb
13	8395201	9.212	5	RNA45S1-1_3.5Mb
13	8398501	9.067	5	RNA45S1-1_3.5Mb
13	8401801	8.697	5	RNA45S1-1_3.5Mb
13	8405101	8.188	5	RNA45S1-1_3.5Mb
13	8431501	7.809	5	RNA45S1-1_3.5Mb
13	8434801	8.845	5	RNA45S1-1_3.5Mb
13	8438101	8.976	5	RNA45S1-1_3.5Mb
13	8441401	9.285	5	RNA45S1-1_3.5Mb
13	8444701	9.067	5	RNA45S1-1_3.5Mb
13	8448001	8.755	5	RNA45S1-1_3.5Mb
13	8451301	8.442	5	RNA45S1-1_3.5Mb
13	8454601	7.206	5	RNA45S1-1_3.5Mb
13	8477701	7.7	5	RNA45S1-1_3.5Mb
13	8481001	8.624	5	RNA45S1-1_3.5Mb
13	8484301	8.921	5	RNA45S1-1_3.5Mb
13	8487601	9.203	5	RNA45S1-1_3.5Mb
13	8490901	9.07	5	RNA45S1-1_3.5Mb
13	8494201	8.864	5	RNA45S1-1_3.5Mb
13	8497501	8.636	5	RNA45S1-1_3.5Mb
13	8500801	7.512	5	RNA45S1-1_3.5Mb
13	8523901	7.539	5	RNA45S1-1_3.5Mb
13	8527201	8.436	5	RNA45S1-1_3.5Mb
13	8530501	8.927	5	RNA45S1-1_3.5Mb
13	8533801	9.224	5	RNA45S1-1_3.5Mb
13	8537101	9.139	5	RNA45S1-1_3.5Mb
13	8540401	8.976	5	RNA45S1-1_3.5Mb
13	8543701	8.603	5	RNA45S1-1_3.5Mb
13	8547001	7.782	5	RNA45S1-1_3.5Mb
13	8570101	7.194	5	RNA45S1-1_3.5Mb
13	8573401	8.245	5	RNA45S1-1_3.5Mb
13	8576701	8.939	5	RNA45S1-1_3.5Mb
13	8580001	9.155	5	RNA45S1-1_3.5Mb
13	8583301	9.194	5	RNA45S1-1_3.5Mb
13	8586601	9.076	5	RNA45S1-1_3.5Mb
13	8589901	8.691	5	RNA45S1-1_3.5Mb
13	8593201	8.082	5	RNA45S1-1_3.5Mb
13	8619601	7.882	5	RNA45S1-1_3.5Mb
13	8622901	8.861	5	RNA45S1-1_3.5Mb
13	8626201	9.027	5	RNA45S1-1_3.5Mb
13	8629501	9.252	5	RNA45S1-1_3.5Mb
13	8632801	9.045	5	RNA45S1-1_3.5Mb
13	8636101	8.745	5	RNA45S1-1_3.5Mb
13	8639401	8.382	5	RNA45S1-1_3.5Mb
13	8642701	7.094	5	RNA45S1-1_3.5Mb
13	8665801	7.712	5	RNA45S1-1_3.5Mb
13	8669101	8.667	5	RNA45S1-1_3.5Mb
13	8672401	8.942	5	RNA45S1-1_3.5Mb
13	8675701	9.233	5	RNA45S1-1_3.5Mb
13	8679001	9.048	5	RNA45S1-1_3.5Mb
13	8682301	8.845	5	RNA45S1-1_3.5Mb
13	8685601	8.588	5	RNA45S1-1_3.5Mb
13	8688901	7.455	5	RNA45S1-1_3.5Mb
13	8712001	7.648	5	RNA45S1-1_3.5Mb
13	8715301	8.464	5	RNA45S1-1_3.5Mb
13	8718601	8.939	5	RNA45S1-1_3.5Mb
13	8721901	9.206	5	RNA45S1-1_3.5Mb
13	8725201	9.112	5	RNA45S1-1_3.5Mb
13	8728501	8.945	5	RNA45S1-1_3.5Mb
13	8731801	8.573	5	RNA45S1-1_3.5Mb
13	8735101	7.706	5	RNA45S1-1_3.5Mb
13	8758201	7.255	5	RNA45S1-1_3.5Mb
13	8761501	8.267	5	RNA45S1-1_3.5Mb
13	8764801	8.952	5	RNA45S1-1_3.5Mb
13	8768101	9.194	5	RNA45S1-1_3.5Mb
13	8771401	9.176	5	RNA45S1-1_3.5Mb
13	8774701	9.061	5	RNA45S1-1_3.5Mb
13	8778001	8.685	5	RNA45S1-1_3.5Mb
13	8781301	7.985	5	RNA45S1-1_3.5Mb
13	8807701	7.97	5	RNA45S1-1_3.5Mb
13	8811001	8.897	5	RNA45S1-1_3.5Mb
13	8814301	9.097	5	RNA45S1-1_3.5Mb
13	8817601	9.221	5	RNA45S1-1_3.5Mb
13	8820901	9.036	5	RNA45S1-1_3.5Mb
13	8824201	8.733	5	RNA45S1-1_3.5Mb
13	8827501	8.336	5	RNA45S1-1_3.5Mb
13	8853901	7.724	5	RNA45S1-1_3.5Mb
13	8857201	8.685	5	RNA45S1-1_3.5Mb
13	8860501	8.942	5	RNA45S1-1_3.5Mb
13	8863801	9.258	5	RNA45S1-1_3.5Mb
13	8867101	9.052	5	RNA45S1-1_3.5Mb
13	8870401	8.812	5	RNA45S1-1_3.5Mb
13	8873701	8.545	5	RNA45S1-1_3.5Mb
13	8877001	7.361	5	RNA45S1-1_3.5Mb
13	8900101	7.667	5	RNA45S1-1_3.5Mb
13	8903401	8.5	5	RNA45S1-1_3.5Mb
13	8906701	8.924	5	RNA45S1-1_3.5Mb
13	8910001	9.209	5	RNA45S1-1_3.5Mb
13	8913301	9.097	5	RNA45S1-1_3.5Mb
13	8916601	8.912	5	RNA45S1-1_3.5Mb
13	8919901	8.612	5	RNA45S1-1_3.5Mb
13	8923201	7.612	5	RNA45S1-1_3.5Mb
13	8946301	7.345	5	RNA45S1-1_3.5Mb
13	8949601	8.285	5	RNA45S1-1_3.5Mb
13	8952901	8.924	5	RNA45S1-1_3.5Mb
13	8956201	9.224	5	RNA45S1-1_3.5Mb
13	8959501	9.161	5	RNA45S1-1_3.5Mb
13	8962801	9.027	5	RNA45S1-1_3.5Mb
13	8966101	8.661	5	RNA45S1-1_3.5Mb
13	8969401	7.879	5	RNA45S1-1_3.5Mb
13	8992501	7.106	5	RNA45S1-1_3.5Mb
13	8995801	8.082	5	RNA45S1-1_3.5Mb
13	8999101	8.912	5	RNA45S1-1_3.5Mb
13	9002401	9.112	5	RNA45S1-1_3.5Mb
13	9005701	9.215	5	RNA45S1-1_3.5Mb
13	9009001	9.058	5	RNA45S1-1_3.5Mb
13	9012301	8.709	5	RNA45S1-1_3.5Mb
13	9015601	8.236	5	RNA45S1-1_3.5Mb
13	9042001	7.776	5	RNA45S1-1_3.5Mb
13	9045301	8.779	5	RNA45S1-1_3.5Mb
13	9048601	8.961	5	RNA45S1-1_3.5Mb
13	9051901	9.276	5	RNA45S1-1_3.5Mb
13	9055201	9.07	5	RNA45S1-1_3.5Mb
13	9058501	8.776	5	RNA45S1-1_3.5Mb
13	9061801	8.473	5	RNA45S1-1_3.5Mb
13	9065101	7.248	5	RNA45S1-1_3.5Mb
13	9088201	7.661	5	RNA45S1-1_3.5Mb
13	9091501	8.615	5	RNA45S1-1_3.5Mb
13	9094801	8.839	5	RNA45S1-1_3.5Mb
13	9098101	9.109	5	RNA45S1-1_3.5Mb
13	9101401	8.952	5	RNA45S1-1_3.5Mb
13	9104701	8.667	5	RNA45S1-1_3.5Mb
13	9108001	8.558	5	RNA45S1-1_3.5Mb
13	9111301	7.442	5	RNA45S1-1_3.5Mb
13	9134401	7.682	5	RNA45S1-1_3.5Mb
13	9137701	8.633	5	RNA45S1-1_3.5Mb
13	9141001	9.009	5	RNA45S1-1_3.5Mb
13	9144301	9.312	5	RNA45S1-1_3.5Mb
13	9147601	9.264	5	RNA45S1-1_3.5Mb
13	9150901	9.061	5	RNA45S1-1_3.5Mb
13	9154201	8.897	5	RNA45S1-1_3.5Mb
13	9157501	7.806	5	RNA45S1-1_3.5Mb
13	9180601	7.694	5	RNA45S1-1_3.5Mb
13	9183901	8.555	5	RNA45S1-1_3.5Mb
13	9187201	8.833	5	RNA45S1-1_3.5Mb
13	9190501	9.07	5	RNA45S1-1_3.5Mb
13	9193801	8.921	5	RNA45S1-1_3.5Mb
13	9197101	8.648	5	RNA45S1-1_3.5Mb
13	9200401	8.597	5	RNA45S1-1_3.5Mb
13	9203701	7.555	5	RNA45S1-1_3.5Mb
13	9226801	8.045	5	RNA45S1-1_3.5Mb
13	9230101	8.709	5	RNA45S1-1_3.5Mb
13	9233401	8.979	5	RNA45S1-1_3.5Mb
13	9236701	8.964	5	RNA45S1-1_3.5Mb
13	9240001	8.894	5	RNA45S1-1_3.5Mb
13	9243301	8.609	5	RNA45S1-1_3.5Mb
13	9246601	8.058	5	RNA45S1-1_3.5Mb
13	9273001	7.085	5	RNA45S1-1_3.5Mb
13	9276301	8.148	5	RNA45S1-1_3.5Mb
13	9279601	8.724	5	RNA45S1-1_3.5Mb
13	9282901	8.994	5	RNA45S1-1_3.5Mb
13	9286201	8.955	5	RNA45S1-1_3.5Mb
13	9289501	8.87	5	RNA45S1-1_3.5Mb
13	9292801	8.461	5	RNA45S1-1_3.5Mb
13	9296101	8	5	RNA45S1-1_3.5Mb
14	2085601	7.936	6	RNA45S2-1_0.6Mb
14	2088901	8.385	6	RNA45S2-1_0.6Mb
14	2092201	8.664	6	RNA45S2-1_0.6Mb
14	2095501	8.515	6	RNA45S2-1_0.6Mb
14	2098801	8.452	6	RNA45S2-1_0.6Mb
14	2102101	8.458	6	RNA45S2-1_0.6Mb
14	2105401	7.47	6	RNA45S2-1_0.6Mb
14	2125201	7.13	6	RNA45S2-1_0.6Mb
14	2128501	8.252	6	RNA45S2-1_0.6Mb
14	2131801	8.703	6	RNA45S2-1_0.6Mb
14	2135101	8.955	6	RNA45S2-1_0.6Mb
14	2138401	8.794	6	RNA45S2-1_0.6Mb
14	2141701	8.697	6	RNA45S2-1_0.6Mb
14	2145001	8.558	6	RNA45S2-1_0.6Mb
14	2148301	7.945	6	RNA45S2-1_0.6Mb
14	2171401	7.803	6	RNA45S2-1_0.6Mb
14	2174701	8.515	6	RNA45S2-1_0.6Mb
14	2178001	8.776	6	RNA45S2-1_0.6Mb
14	2181301	8.897	6	RNA45S2-1_0.6Mb
14	2184601	8.848	6	RNA45S2-1_0.6Mb
14	2187901	8.473	6	RNA45S2-1_0.6Mb
14	2191201	8.376	6	RNA45S2-1_0.6Mb
14	2194501	7.267	6	RNA45S2-1_0.6Mb
14	2214301	7.321	6	RNA45S2-1_0.6Mb
14	2217601	8.291	6	RNA45S2-1_0.6Mb
14	2220901	8.77	6	RNA45S2-1_0.6Mb
14	2224201	8.991	6	RNA45S2-1_0.6Mb
14	2227501	8.773	6	RNA45S2-1_0.6Mb
14	2230801	8.621	6	RNA45S2-1_0.6Mb
14	2234101	8.585	6	RNA45S2-1_0.6Mb
14	2237401	7.724	6	RNA45S2-1_0.6Mb
14	2260501	7.952	6	RNA45S2-1_0.6Mb
14	2263801	8.573	6	RNA45S2-1_0.6Mb
14	2267101	8.839	6	RNA45S2-1_0.6Mb
14	2270401	8.879	6	RNA45S2-1_0.6Mb
14	2273701	8.797	6	RNA45S2-1_0.6Mb
14	2277001	8.503	6	RNA45S2-1_0.6Mb
14	2280301	8.224	6	RNA45S2-1_0.6Mb
14	2283601	7.012	6	RNA45S2-1_0.6Mb
14	2303401	7.618	6	RNA45S2-1_0.6Mb
14	2306701	8.439	6	RNA45S2-1_0.6Mb
14	2310001	8.736	6	RNA45S2-1_0.6Mb
14	2313301	8.958	6	RNA45S2-1_0.6Mb
14	2316601	8.809	6	RNA45S2-1_0.6Mb
14	2319901	8.536	6	RNA45S2-1_0.6Mb
14	2323201	8.473	6	RNA45S2-1_0.6Mb
14	2326501	7.594	6	RNA45S2-1_0.6Mb
14	2346301	7.055	6	RNA45S2-1_0.6Mb
14	2349601	8.139	6	RNA45S2-1_0.6Mb
14	2352901	8.679	6	RNA45S2-1_0.6Mb
14	2356201	8.933	6	RNA45S2-1_0.6Mb
14	2359501	8.803	6	RNA45S2-1_0.6Mb
14	2362801	8.727	6	RNA45S2-1_0.6Mb
14	2366101	8.552	6	RNA45S2-1_0.6Mb
14	2369401	8.058	6	RNA45S2-1_0.6Mb
14	2392501	7.758	6	RNA45S2-1_0.6Mb
14	2395801	8.503	6	RNA45S2-1_0.6Mb
14	2399101	8.755	6	RNA45S2-1_0.6Mb
14	2402401	8.906	6	RNA45S2-1_0.6Mb
14	2405701	8.842	6	RNA45S2-1_0.6Mb
14	2409001	8.455	6	RNA45S2-1_0.6Mb
14	2412301	8.436	6	RNA45S2-1_0.6Mb
14	2415601	7.361	6	RNA45S2-1_0.6Mb
14	2435401	7.236	6	RNA45S2-1_0.6Mb
14	2438701	8.291	6	RNA45S2-1_0.6Mb
14	2442001	8.761	6	RNA45S2-1_0.6Mb
14	2445301	8.979	6	RNA45S2-1_0.6Mb
14	2448601	8.776	6	RNA45S2-1_0.6Mb
14	2451901	8.652	6	RNA45S2-1_0.6Mb
14	2455201	8.585	6	RNA45S2-1_0.6Mb
14	2458501	7.827	6	RNA45S2-1_0.6Mb
14	2481601	7.839	6	RNA45S2-1_0.6Mb
14	2484901	8.545	6	RNA45S2-1_0.6Mb
14	2488201	8.806	6	RNA45S2-1_0.6Mb
14	2491501	8.879	6	RNA45S2-1_0.6Mb
14	2494801	8.827	6	RNA45S2-1_0.6Mb
14	2498101	8.491	6	RNA45S2-1_0.6Mb
14	2501401	8.288	6	RNA45S2-1_0.6Mb
14	2504701	7.127	6	RNA45S2-1_0.6Mb
14	2524501	7.467	6	RNA45S2-1_0.6Mb
14	2527801	8.406	6	RNA45S2-1_0.6Mb
14	2531101	8.73	6	RNA45S2-1_0.6Mb
14	2534401	8.997	6	RNA45S2-1_0.6Mb
14	2537701	8.806	6	RNA45S2-1_0.6Mb
14	2541001	8.564	6	RNA45S2-1_0.6Mb
14	2544301	8.521	6	RNA45S2-1_0.6Mb
14	2547601	7.658	6	RNA45S2-1_0.6Mb
14	2570701	8.036	6	RNA45S2-1_0.6Mb
14	2574001	8.642	6	RNA45S2-1_0.6Mb
14	2577301	8.9	6	RNA45S2-1_0.6Mb
14	2580601	8.824	6	RNA45S2-1_0.6Mb
14	2583901	8.742	6	RNA45S2-1_0.6Mb
14	2587201	8.521	6	RNA45S2-1_0.6Mb
14	2590501	8.148	6	RNA45S2-1_0.6Mb
14	2613601	7.676	6	RNA45S2-1_0.6Mb
14	2616901	8.485	6	RNA45S2-1_0.6Mb
14	2620201	8.791	6	RNA45S2-1_0.6Mb
14	2623501	8.918	6	RNA45S2-1_0.6Mb
14	2626801	8.815	6	RNA45S2-1_0.6Mb
14	2630101	8.5	6	RNA45S2-1_0.6Mb
14	2633401	8.452	6	RNA45S2-1_0.6Mb
14	2636701	7.458	6	RNA45S2-1_0.6Mb
14	2656501	7.145	6	RNA45S2-1_0.6Mb
14	2659801	8.264	6	RNA45S2-1_0.6Mb
14	2663101	8.709	6	RNA45S2-1_0.6Mb
14	2666401	8.955	6	RNA45S2-1_0.6Mb
14	2669701	8.791	6	RNA45S2-1_0.6Mb
14	2673001	8.685	6	RNA45S2-1_0.6Mb
14	2676301	8.564	6	RNA45S2-1_0.6Mb
14	2679601	7.93	6	RNA45S2-1_0.6Mb
14	2702701	7.815	6	RNA45S2-1_0.6Mb
14	2706001	8.527	6	RNA45S2-1_0.6Mb
14	2709301	8.797	6	RNA45S2-1_0.6Mb
14	2712601	8.897	6	RNA45S2-1_0.6Mb
14	2715901	8.867	6	RNA45S2-1_0.6Mb
14	2719201	8.506	6	RNA45S2-1_0.6Mb
14	2722501	8.373	6	RNA45S2-1_0.6Mb
14	2725801	7.264	6	RNA45S2-1_0.6Mb
14	2745601	7.388	6	RNA45S2-1_0.6Mb
14	2748901	8.33	6	RNA45S2-1_0.6Mb
14	2752201	8.764	6	RNA45S2-1_0.6Mb
14	2755501	9.027	6	RNA45S2-1_0.6Mb
14	2758801	8.821	6	RNA45S2-1_0.6Mb
14	2762101	8.591	6	RNA45S2-1_0.6Mb
14	2765401	8.558	6	RNA45S2-1_0.6Mb
14	2768701	7.727	6	RNA45S2-1_0.6Mb
15	2491501	7.727	7	RNA45S3-1_1.4Mb
15	2494801	8.185	7	RNA45S3-1_1.4Mb
15	2498101	8.512	7	RNA45S3-1_1.4Mb
15	2501401	8.512	7	RNA45S3-1_1.4Mb
15	2504701	8.427	7	RNA45S3-1_1.4Mb
15	2508001	8.436	7	RNA45S3-1_1.4Mb
15	2511301	7.633	7	RNA45S3-1_1.4Mb
15	2531101	7.536	7	RNA45S3-1_1.4Mb
15	2534401	8.273	7	RNA45S3-1_1.4Mb
15	2537701	8.633	7	RNA45S3-1_1.4Mb
15	2541001	8.773	7	RNA45S3-1_1.4Mb
15	2544301	8.715	7	RNA45S3-1_1.4Mb
15	2547601	8.5	7	RNA45S3-1_1.4Mb
15	2550901	8.412	7	RNA45S3-1_1.4Mb
15	2554201	7.524	7	RNA45S3-1_1.4Mb
15	2574001	7.667	7	RNA45S3-1_1.4Mb
15	2577301	8.303	7	RNA45S3-1_1.4Mb
15	2580601	8.673	7	RNA45S3-1_1.4Mb
15	2583901	8.7	7	RNA45S3-1_1.4Mb
15	2587201	8.679	7	RNA45S3-1_1.4Mb
15	2590501	8.509	7	RNA45S3-1_1.4Mb
15	2593801	8.4	7	RNA45S3-1_1.4Mb
15	2597101	7.379	7	RNA45S3-1_1.4Mb
15	2616901	7.773	7	RNA45S3-1_1.4Mb
15	2620201	8.348	7	RNA45S3-1_1.4Mb
15	2623501	8.676	7	RNA45S3-1_1.4Mb
15	2626801	8.67	7	RNA45S3-1_1.4Mb
15	2630101	8.658	7	RNA45S3-1_1.4Mb
15	2633401	8.503	7	RNA45S3-1_1.4Mb
15	2636701	8.37	7	RNA45S3-1_1.4Mb
15	2640001	7.264	7	RNA45S3-1_1.4Mb
15	2659801	7.827	7	RNA45S3-1_1.4Mb
15	2663101	8.43	7	RNA45S3-1_1.4Mb
15	2666401	8.688	7	RNA45S3-1_1.4Mb
15	2669701	8.676	7	RNA45S3-1_1.4Mb
15	2673001	8.615	7	RNA45S3-1_1.4Mb
15	2676301	8.479	7	RNA45S3-1_1.4Mb
15	2679601	8.264	7	RNA45S3-1_1.4Mb
15	2682901	7.121	7	RNA45S3-1_1.4Mb
15	2699401	7.042	7	RNA45S3-1_1.4Mb
15	2702701	7.948	7	RNA45S3-1_1.4Mb
15	2706001	8.455	7	RNA45S3-1_1.4Mb
15	2709301	8.718	7	RNA45S3-1_1.4Mb
15	2712601	8.736	7	RNA45S3-1_1.4Mb
15	2715901	8.561	7	RNA45S3-1_1.4Mb
15	2719201	8.415	7	RNA45S3-1_1.4Mb
15	2722501	8.148	7	RNA45S3-1_1.4Mb
15	2742301	7.079	7	RNA45S3-1_1.4Mb
15	2745601	8.052	7	RNA45S3-1_1.4Mb
15	2748901	8.527	7	RNA45S3-1_1.4Mb
15	2752201	8.761	7	RNA45S3-1_1.4Mb
15	2755501	8.691	7	RNA45S3-1_1.4Mb
15	2758801	8.491	7	RNA45S3-1_1.4Mb
15	2762101	8.391	7	RNA45S3-1_1.4Mb
15	2765401	8.021	7	RNA45S3-1_1.4Mb
15	2785201	7.194	7	RNA45S3-1_1.4Mb
15	2788501	8.212	7	RNA45S3-1_1.4Mb
15	2791801	8.6	7	RNA45S3-1_1.4Mb
15	2795101	8.815	7	RNA45S3-1_1.4Mb
15	2798401	8.745	7	RNA45S3-1_1.4Mb
15	2801701	8.47	7	RNA45S3-1_1.4Mb
15	2805001	8.373	7	RNA45S3-1_1.4Mb
15	2808301	7.879	7	RNA45S3-1_1.4Mb
15	2828101	7.273	7	RNA45S3-1_1.4Mb
15	2831401	8.258	7	RNA45S3-1_1.4Mb
15	2834701	8.645	7	RNA45S3-1_1.4Mb
15	2838001	8.839	7	RNA45S3-1_1.4Mb
15	2841301	8.767	7	RNA45S3-1_1.4Mb
15	2844601	8.491	7	RNA45S3-1_1.4Mb
15	2847901	8.382	7	RNA45S3-1_1.4Mb
15	2851201	7.736	7	RNA45S3-1_1.4Mb
15	2871001	7.37	7	RNA45S3-1_1.4Mb
15	2874301	8.255	7	RNA45S3-1_1.4Mb
15	2877601	8.682	7	RNA45S3-1_1.4Mb
15	2880901	8.818	7	RNA45S3-1_1.4Mb
15	2884201	8.745	7	RNA45S3-1_1.4Mb
15	2887501	8.5	7	RNA45S3-1_1.4Mb
15	2890801	8.418	7	RNA45S3-1_1.4Mb
15	2894101	7.597	7	RNA45S3-1_1.4Mb
15	2913901	7.582	7	RNA45S3-1_1.4Mb
15	2917201	8.276	7	RNA45S3-1_1.4Mb
15	2920501	8.639	7	RNA45S3-1_1.4Mb
15	2923801	8.755	7	RNA45S3-1_1.4Mb
15	2927101	8.709	7	RNA45S3-1_1.4Mb
15	2930401	8.5	7	RNA45S3-1_1.4Mb
15	2933701	8.418	7	RNA45S3-1_1.4Mb
15	2937001	7.509	7	RNA45S3-1_1.4Mb
15	2956801	7.679	7	RNA45S3-1_1.4Mb
15	2960101	8.315	7	RNA45S3-1_1.4Mb
15	2963401	8.679	7	RNA45S3-1_1.4Mb
15	2966701	8.691	7	RNA45S3-1_1.4Mb
15	2970001	8.679	7	RNA45S3-1_1.4Mb
15	2973301	8.515	7	RNA45S3-1_1.4Mb
15	2976601	8.403	7	RNA45S3-1_1.4Mb
15	2979901	7.364	7	RNA45S3-1_1.4Mb
15	2999701	7.782	7	RNA45S3-1_1.4Mb
15	3003001	8.352	7	RNA45S3-1_1.4Mb
15	3006301	8.694	7	RNA45S3-1_1.4Mb
15	3009601	8.667	7	RNA45S3-1_1.4Mb
15	3012901	8.648	7	RNA45S3-1_1.4Mb
15	3016201	8.506	7	RNA45S3-1_1.4Mb
15	3019501	8.355	7	RNA45S3-1_1.4Mb
15	3022801	7.242	7	RNA45S3-1_1.4Mb
15	3042601	7.83	7	RNA45S3-1_1.4Mb
15	3045901	8.433	7	RNA45S3-1_1.4Mb
15	3049201	8.691	7	RNA45S3-1_1.4Mb
15	3052501	8.682	7	RNA45S3-1_1.4Mb
15	3055801	8.609	7	RNA45S3-1_1.4Mb
15	3059101	8.467	7	RNA45S3-1_1.4Mb
15	3062401	8.248	7	RNA45S3-1_1.4Mb
15	3065701	7.1	7	RNA45S3-1_1.4Mb
15	3082201	7.052	7	RNA45S3-1_1.4Mb
15	3085501	7.958	7	RNA45S3-1_1.4Mb
15	3088801	8.47	7	RNA45S3-1_1.4Mb
15	3092101	8.721	7	RNA45S3-1_1.4Mb
15	3095401	8.73	7	RNA45S3-1_1.4Mb
15	3098701	8.552	7	RNA45S3-1_1.4Mb
15	3102001	8.409	7	RNA45S3-1_1.4Mb
15	3105301	8.124	7	RNA45S3-1_1.4Mb
15	3125101	7.106	7	RNA45S3-1_1.4Mb
15	3128401	8.076	7	RNA45S3-1_1.4Mb
15	3131701	8.545	7	RNA45S3-1_1.4Mb
15	3135001	8.773	7	RNA45S3-1_1.4Mb
15	3138301	8.694	7	RNA45S3-1_1.4Mb
15	3141601	8.494	7	RNA45S3-1_1.4Mb
15	3144901	8.385	7	RNA45S3-1_1.4Mb
15	3148201	7.997	7	RNA45S3-1_1.4Mb
15	3168001	7.197	7	RNA45S3-1_1.4Mb
15	3171301	8.23	7	RNA45S3-1_1.4Mb
15	3174601	8.603	7	RNA45S3-1_1.4Mb
15	3177901	8.821	7	RNA45S3-1_1.4Mb
15	3181201	8.748	7	RNA45S3-1_1.4Mb
15	3184501	8.464	7	RNA45S3-1_1.4Mb
15	3187801	8.37	7	RNA45S3-1_1.4Mb
15	3191101	7.867	7	RNA45S3-1_1.4Mb
15	3210901	7.267	7	RNA45S3-1_1.4Mb
15	3214201	8.273	7	RNA45S3-1_1.4Mb
15	3217501	8.827	7	RNA45S3-1_1.4Mb
15	3220801	9.076	7	RNA45S3-1_1.4Mb
15	3224101	8.958	7	RNA45S3-1_1.4Mb
15	3227401	8.803	7	RNA45S3-1_1.4Mb
15	3230701	8.736	7	RNA45S3-1_1.4Mb
15	3234001	7.991	7	RNA45S3-1_1.4Mb
15	3253801	7.048	7	RNA45S3-1_1.4Mb
15	3257101	7.982	7	RNA45S3-1_1.4Mb
15	3260401	8.679	7	RNA45S3-1_1.4Mb
15	3263701	8.897	7	RNA45S3-1_1.4Mb
15	3267001	9.009	7	RNA45S3-1_1.4Mb
15	3270301	8.927	7	RNA45S3-1_1.4Mb
15	3273601	8.703	7	RNA45S3-1_1.4Mb
15	3276901	8.373	7	RNA45S3-1_1.4Mb
15	3280201	7.145	7	RNA45S3-1_1.4Mb
15	3300001	7.712	7	RNA45S3-1_1.4Mb
15	3303301	8.567	7	RNA45S3-1_1.4Mb
15	3306601	8.791	7	RNA45S3-1_1.4Mb
15	3309901	9.058	7	RNA45S3-1_1.4Mb
15	3313201	9.015	7	RNA45S3-1_1.4Mb
15	3316501	8.67	7	RNA45S3-1_1.4Mb
15	3319801	8.627	7	RNA45S3-1_1.4Mb
15	3323101	7.582	7	RNA45S3-1_1.4Mb
15	3342901	7.306	7	RNA45S3-1_1.4Mb
15	3346201	8.267	7	RNA45S3-1_1.4Mb
15	3349501	8.803	7	RNA45S3-1_1.4Mb
15	3352801	9.07	7	RNA45S3-1_1.4Mb
15	3356101	8.988	7	RNA45S3-1_1.4Mb
15	3359401	8.785	7	RNA45S3-1_1.4Mb
15	3362701	8.736	7	RNA45S3-1_1.4Mb
15	3366001	7.958	7	RNA45S3-1_1.4Mb
15	3385801	7.076	7	RNA45S3-1_1.4Mb
15	3389101	8.021	7	RNA45S3-1_1.4Mb
15	3392401	8.694	7	RNA45S3-1_1.4Mb
15	3395701	8.933	7	RNA45S3-1_1.4Mb
15	3399001	8.976	7	RNA45S3-1_1.4Mb
15	3402301	8.897	7	RNA45S3-1_1.4Mb
15	3405601	8.727	7	RNA45S3-1_1.4Mb
15	3408901	8.321	7	RNA45S3-1_1.4Mb
15	3412201	7.048	7	RNA45S3-1_1.4Mb
15	3432001	7.767	7	RNA45S3-1_1.4Mb
15	3435301	8.597	7	RNA45S3-1_1.4Mb
15	3438601	8.791	7	RNA45S3-1_1.4Mb
15	3441901	9.058	7	RNA45S3-1_1.4Mb
15	3445201	9.039	7	RNA45S3-1_1.4Mb
15	3448501	8.676	7	RNA45S3-1_1.4Mb
15	3451801	8.597	7	RNA45S3-1_1.4Mb
15	3455101	7.527	7	RNA45S3-1_1.4Mb
15	3474901	7.364	7	RNA45S3-1_1.4Mb
15	3478201	8.297	7	RNA45S3-1_1.4Mb
15	3481501	8.782	7	RNA45S3-1_1.4Mb
15	3484801	9.076	7	RNA45S3-1_1.4Mb
15	3488101	8.994	7	RNA45S3-1_1.4Mb
15	3491401	8.748	7	RNA45S3-1_1.4Mb
15	3494701	8.703	7	RNA45S3-1_1.4Mb
15	3498001	7.891	7	RNA45S3-1_1.4Mb
15	3517801	7.112	7	RNA45S3-1_1.4Mb
15	3521101	8.088	7	RNA45S3-1_1.4Mb
15	3524401	8.703	7	RNA45S3-1_1.4Mb
15	3527701	8.973	7	RNA45S3-1_1.4Mb
15	3531001	8.961	7	RNA45S3-1_1.4Mb
15	3534301	8.885	7	RNA45S3-1_1.4Mb
15	3537601	8.73	7	RNA45S3-1_1.4Mb
15	3540901	8.282	7	RNA45S3-1_1.4Mb
15	3564001	7.794	7	RNA45S3-1_1.4Mb
15	3567301	8.597	7	RNA45S3-1_1.4Mb
15	3570601	8.818	7	RNA45S3-1_1.4Mb
15	3573901	9.048	7	RNA45S3-1_1.4Mb
15	3577201	9.03	7	RNA45S3-1_1.4Mb
15	3580501	8.682	7	RNA45S3-1_1.4Mb
15	3583801	8.573	7	RNA45S3-1_1.4Mb
15	3587101	7.476	7	RNA45S3-1_1.4Mb
15	3606901	7.445	7	RNA45S3-1_1.4Mb
15	3610201	8.37	7	RNA45S3-1_1.4Mb
15	3613501	8.785	7	RNA45S3-1_1.4Mb
15	3616801	9.061	7	RNA45S3-1_1.4Mb
15	3620101	8.991	7	RNA45S3-1_1.4Mb
15	3623401	8.721	7	RNA45S3-1_1.4Mb
15	3626701	8.676	7	RNA45S3-1_1.4Mb
15	3630001	7.836	7	RNA45S3-1_1.4Mb
15	3649801	7.185	7	RNA45S3-1_1.4Mb
15	3653101	8.145	7	RNA45S3-1_1.4Mb
15	3656401	8.73	7	RNA45S3-1_1.4Mb
15	3659701	9	7	RNA45S3-1_1.4Mb
15	3663001	8.955	7	RNA45S3-1_1.4Mb
15	3666301	8.882	7	RNA45S3-1_1.4Mb
15	3669601	8.733	7	RNA45S3-1_1.4Mb
15	3672901	8.212	7	RNA45S3-1_1.4Mb
15	3696001	7.815	7	RNA45S3-1_1.4Mb
15	3699301	8.624	7	RNA45S3-1_1.4Mb
15	3702601	8.848	7	RNA45S3-1_1.4Mb
15	3705901	9.048	7	RNA45S3-1_1.4Mb
15	3709201	9.021	7	RNA45S3-1_1.4Mb
15	3712501	8.7	7	RNA45S3-1_1.4Mb
15	3715801	8.545	7	RNA45S3-1_1.4Mb
15	3719101	7.403	7	RNA45S3-1_1.4Mb
15	3738901	7.536	7	RNA45S3-1_1.4Mb
15	3742201	8.403	7	RNA45S3-1_1.4Mb
15	3745501	8.785	7	RNA45S3-1_1.4Mb
15	3748801	9.061	7	RNA45S3-1_1.4Mb
15	3752101	8.991	7	RNA45S3-1_1.4Mb
15	3755401	8.706	7	RNA45S3-1_1.4Mb
15	3758701	8.636	7	RNA45S3-1_1.4Mb
15	3762001	7.803	7	RNA45S3-1_1.4Mb
15	3781801	7.194	7	RNA45S3-1_1.4Mb
15	3785101	8.218	7	RNA45S3-1_1.4Mb
15	3788401	8.742	7	RNA45S3-1_1.4Mb
15	3791701	9.033	7	RNA45S3-1_1.4Mb
15	3795001	8.952	7	RNA45S3-1_1.4Mb
15	3798301	8.864	7	RNA45S3-1_1.4Mb
15	3801601	8.745	7	RNA45S3-1_1.4Mb
15	3804901	8.152	7	RNA45S3-1_1.4Mb
15	3828001	7.83	7	RNA45S3-1_1.4Mb
15	3831301	8.636	7	RNA45S3-1_1.4Mb
15	3834601	8.848	7	RNA45S3-1_1.4Mb
15	3837901	9.039	7	RNA45S3-1_1.4Mb
15	3841201	9.003	7	RNA45S3-1_1.4Mb
15	3844501	8.706	7	RNA45S3-1_1.4Mb
15	3847801	8.53	7	RNA45S3-1_1.4Mb
15	3851101	7.339	7	RNA45S3-1_1.4Mb
15	3870901	7.624	7	RNA45S3-1_1.4Mb
15	3874201	8.415	7	RNA45S3-1_1.4Mb
15	3877501	8.806	7	RNA45S3-1_1.4Mb
15	3880801	9.052	7	RNA45S3-1_1.4Mb
15	3884101	8.991	7	RNA45S3-1_1.4Mb
15	3887401	8.691	7	RNA45S3-1_1.4Mb
15	3890701	8.615	7	RNA45S3-1_1.4Mb
15	3894001	7.758	7	RNA45S3-1_1.4Mb
15	3913801	7.206	7	RNA45S3-1_1.4Mb
15	3917101	8.273	7	RNA45S3-1_1.4Mb
15	3920401	8.776	7	RNA45S3-1_1.4Mb
15	3923701	9.036	7	RNA45S3-1_1.4Mb
15	3927001	8.945	7	RNA45S3-1_1.4Mb
15	3930301	8.836	7	RNA45S3-1_1.4Mb
15	3933601	8.615	7	RNA45S3-1_1.4Mb
15	3936901	8.033	7	RNA45S3-1_1.4Mb
15	3960001	7.658	7	RNA45S3-1_1.4Mb
15	3963301	8.442	7	RNA45S3-1_1.4Mb
15	3966601	8.8	7	RNA45S3-1_1.4Mb
15	3969901	9.036	7	RNA45S3-1_1.4Mb
15	3973201	8.888	7	RNA45S3-1_1.4Mb
15	3976501	8.655	7	RNA45S3-1_1.4Mb
15	3979801	8.603	7	RNA45S3-1_1.4Mb
15	3983101	7.573	7	RNA45S3-1_1.4Mb
15	4006201	7.967	7	RNA45S3-1_1.4Mb
15	4009501	8.676	7	RNA45S3-1_1.4Mb
15	4012801	8.894	7	RNA45S3-1_1.4Mb
15	4016101	9.003	7	RNA45S3-1_1.4Mb
15	4019401	8.915	7	RNA45S3-1_1.4Mb
15	4022701	8.536	7	RNA45S3-1_1.4Mb
15	4026001	8.23	7	RNA45S3-1_1.4Mb
15	4029301	7.052	7	RNA45S3-1_1.4Mb
15	4049101	7.318	7	RNA45S3-1_1.4Mb
15	4052401	8.248	7	RNA45S3-1_1.4Mb
15	4055701	8.782	7	RNA45S3-1_1.4Mb
15	4059001	9.07	7	RNA45S3-1_1.4Mb
15	4062301	8.9	7	RNA45S3-1_1.4Mb
15	4065601	8.773	7	RNA45S3-1_1.4Mb
15	4068901	8.679	7	RNA45S3-1_1.4Mb
15	4072201	7.839	7	RNA45S3-1_1.4Mb
15	4095301	7.788	7	RNA45S3-1_1.4Mb
15	4098601	8.594	7	RNA45S3-1_1.4Mb
15	4101901	8.809	7	RNA45S3-1_1.4Mb
15	4105201	9.045	7	RNA45S3-1_1.4Mb
15	4108501	8.9	7	RNA45S3-1_1.4Mb
15	4111801	8.576	7	RNA45S3-1_1.4Mb
15	4115101	8.512	7	RNA45S3-1_1.4Mb
15	4118401	7.406	7	RNA45S3-1_1.4Mb
15	4138201	7.079	7	RNA45S3-1_1.4Mb
15	4141501	8.17	7	RNA45S3-1_1.4Mb
15	4144801	8.727	7	RNA45S3-1_1.4Mb
15	4148101	8.997	7	RNA45S3-1_1.4Mb
15	4151401	8.958	7	RNA45S3-1_1.4Mb
15	4154701	8.867	7	RNA45S3-1_1.4Mb
15	4158001	8.606	7	RNA45S3-1_1.4Mb
15	4161301	8.109	7	RNA45S3-1_1.4Mb
15	4184401	7.6	7	RNA45S3-1_1.4Mb
15	4187701	8.409	7	RNA45S3-1_1.4Mb
15	4191001	8.791	7	RNA45S3-1_1.4Mb
15	4194301	9.042	7	RNA45S3-1_1.4Mb
15	4197601	8.861	7	RNA45S3-1_1.4Mb
15	4200901	8.691	7	RNA45S3-1_1.4Mb
15	4204201	8.618	7	RNA45S3-1_1.4Mb
15	4207501	7.679	7	RNA45S3-1_1.4Mb
15	4230601	7.912	7	RNA45S3-1_1.4Mb
15	4233901	8.652	7	RNA45S3-1_1.4Mb
15	4237201	8.848	7	RNA45S3-1_1.4Mb
15	4240501	9.027	7	RNA45S3-1_1.4Mb
15	4243801	8.909	7	RNA45S3-1_1.4Mb
15	4247101	8.518	7	RNA45S3-1_1.4Mb
15	4250401	8.315	7	RNA45S3-1_1.4Mb
15	4253701	7.161	7	RNA45S3-1_1.4Mb
15	4273501	7.224	7	RNA45S3-1_1.4Mb
15	4276801	8.264	7	RNA45S3-1_1.4Mb
15	4280101	8.824	7	RNA45S3-1_1.4Mb
15	4283401	9.064	7	RNA45S3-1_1.4Mb
15	4286701	8.921	7	RNA45S3-1_1.4Mb
15	4290001	8.803	7	RNA45S3-1_1.4Mb
15	4293301	8.658	7	RNA45S3-1_1.4Mb
15	4296601	7.936	7	RNA45S3-1_1.4Mb
15	4319701	7.715	7	RNA45S3-1_1.4Mb
15	4323001	8.579	7	RNA45S3-1_1.4Mb
15	4326301	8.785	7	RNA45S3-1_1.4Mb
15	4329601	9.055	7	RNA45S3-1_1.4Mb
15	4332901	8.906	7	RNA45S3-1_1.4Mb
15	4336201	8.615	7	RNA45S3-1_1.4Mb
15	4339501	8.579	7	RNA45S3-1_1.4Mb
15	4342801	7.497	7	RNA45S3-1_1.4Mb
15	4365901	8.067	7	RNA45S3-1_1.4Mb
15	4369201	8.7	7	RNA45S3-1_1.4Mb
15	4372501	8.961	7	RNA45S3-1_1.4Mb
15	4375801	8.958	7	RNA45S3-1_1.4Mb
15	4379101	8.885	7	RNA45S3-1_1.4Mb
15	4382401	8.579	7	RNA45S3-1_1.4Mb
15	4385701	8.17	7	RNA45S3-1_1.4Mb
15	4408801	7.455	7	RNA45S3-1_1.4Mb
15	4412101	8.379	7	RNA45S3-1_1.4Mb
15	4415401	8.782	7	RNA45S3-1_1.4Mb
15	4418701	9.052	7	RNA45S3-1_1.4Mb
15	4422001	8.879	7	RNA45S3-1_1.4Mb
15	4425301	8.721	7	RNA45S3-1_1.4Mb
15	4428601	8.667	7	RNA45S3-1_1.4Mb
15	4431901	7.736	7	RNA45S3-1_1.4Mb
15	4455001	7.818	7	RNA45S3-1_1.4Mb
15	4458301	8.63	7	RNA45S3-1_1.4Mb
15	4461601	8.842	7	RNA45S3-1_1.4Mb
15	4464901	9.036	7	RNA45S3-1_1.4Mb
15	4468201	8.909	7	RNA45S3-1_1.4Mb
15	4471501	8.555	7	RNA45S3-1_1.4Mb
15	4474801	8.43	7	RNA45S3-1_1.4Mb
15	4478101	7.273	7	RNA45S3-1_1.4Mb
15	4497901	7.158	7	RNA45S3-1_1.4Mb
15	4501201	8.27	7	RNA45S3-1_1.4Mb
15	4504501	8.782	7	RNA45S3-1_1.4Mb
15	4507801	9.036	7	RNA45S3-1_1.4Mb
15	4511101	8.942	7	RNA45S3-1_1.4Mb
15	4514401	8.836	7	RNA45S3-1_1.4Mb
15	4517701	8.621	7	RNA45S3-1_1.4Mb
15	4521001	8.024	7	RNA45S3-1_1.4Mb
15	4544101	7.658	7	RNA45S3-1_1.4Mb
15	4547401	8.452	7	RNA45S3-1_1.4Mb
15	4550701	8.8	7	RNA45S3-1_1.4Mb
15	4554001	9.036	7	RNA45S3-1_1.4Mb
15	4557301	8.891	7	RNA45S3-1_1.4Mb
15	4560601	8.652	7	RNA45S3-1_1.4Mb
15	4563901	8.603	7	RNA45S3-1_1.4Mb
15	4567201	7.567	7	RNA45S3-1_1.4Mb
15	4590301	7.979	7	RNA45S3-1_1.4Mb
15	4593601	8.676	7	RNA45S3-1_1.4Mb
15	4596901	8.894	7	RNA45S3-1_1.4Mb
15	4600201	9	7	RNA45S3-1_1.4Mb
15	4603501	8.906	7	RNA45S3-1_1.4Mb
15	4606801	8.542	7	RNA45S3-1_1.4Mb
15	4610101	8.224	7	RNA45S3-1_1.4Mb
15	4613401	7.042	7	RNA45S3-1_1.4Mb
15	4633201	7.336	7	RNA45S3-1_1.4Mb
15	4636501	8.285	7	RNA45S3-1_1.4Mb
15	4639801	8.794	7	RNA45S3-1_1.4Mb
15	4643101	9.082	7	RNA45S3-1_1.4Mb
15	4646401	8.906	7	RNA45S3-1_1.4Mb
15	4649701	8.77	7	RNA45S3-1_1.4Mb
15	4653001	8.509	7	RNA45S3-1_1.4Mb
15	4656301	7.688	7	RNA45S3-1_1.4Mb
19	40002601	7.018	8	SST1_0.04Mb
19	40005901	7	8	SST1_0.04Mb
19	40009201	7.033	8	SST1_0.04Mb
19	40012501	7.048	8	SST1_0.04Mb
19	40015801	7.033	8	SST1_0.04Mb
19	40019101	7.033	8	SST1_0.04Mb
19	40022401	7.042	8	SST1_0.04Mb
19	40025701	7.045	8	SST1_0.04Mb
19	40029001	7.003	8	SST1_0.04Mb
19	40032301	7.003	8	SST1_0.04Mb
21	3092101	7.318	9	RNA45S4_2.4Mb
21	3095401	8.145	9	RNA45S4_2.4Mb
21	3098701	8.648	9	RNA45S4_2.4Mb
21	3102001	8.827	9	RNA45S4_2.4Mb
21	3105301	8.752	9	RNA45S4_2.4Mb
21	3108601	8.618	9	RNA45S4_2.4Mb
21	3111901	8.261	9	RNA45S4_2.4Mb
21	3115201	7.073	9	RNA45S4_2.4Mb
21	3135001	7.388	9	RNA45S4_2.4Mb
21	3138301	8.309	9	RNA45S4_2.4Mb
21	3141601	8.809	9	RNA45S4_2.4Mb
21	3144901	9.094	9	RNA45S4_2.4Mb
21	3148201	8.912	9	RNA45S4_2.4Mb
21	3151501	8.764	9	RNA45S4_2.4Mb
21	3154801	8.703	9	RNA45S4_2.4Mb
21	3158101	7.812	9	RNA45S4_2.4Mb
21	3181201	7.821	9	RNA45S4_2.4Mb
21	3184501	8.642	9	RNA45S4_2.4Mb
21	3187801	8.879	9	RNA45S4_2.4Mb
21	3191101	9.064	9	RNA45S4_2.4Mb
21	3194401	8.927	9	RNA45S4_2.4Mb
21	3197701	8.579	9	RNA45S4_2.4Mb
21	3201001	8.464	9	RNA45S4_2.4Mb
21	3204301	7.297	9	RNA45S4_2.4Mb
21	3224101	7.212	9	RNA45S4_2.4Mb
21	3227401	8.303	9	RNA45S4_2.4Mb
21	3230701	8.83	9	RNA45S4_2.4Mb
21	3234001	9.076	9	RNA45S4_2.4Mb
21	3237301	8.955	9	RNA45S4_2.4Mb
21	3240601	8.836	9	RNA45S4_2.4Mb
21	3243901	8.679	9	RNA45S4_2.4Mb
21	3247201	7.994	9	RNA45S4_2.4Mb
21	3270301	7.733	9	RNA45S4_2.4Mb
21	3273601	8.588	9	RNA45S4_2.4Mb
21	3276901	8.815	9	RNA45S4_2.4Mb
21	3280201	9.082	9	RNA45S4_2.4Mb
21	3283501	8.93	9	RNA45S4_2.4Mb
21	3286801	8.63	9	RNA45S4_2.4Mb
21	3290101	8.594	9	RNA45S4_2.4Mb
21	3293401	7.515	9	RNA45S4_2.4Mb
21	3313201	7.058	9	RNA45S4_2.4Mb
21	3316501	8.148	9	RNA45S4_2.4Mb
21	3319801	8.733	9	RNA45S4_2.4Mb
21	3323101	9.015	9	RNA45S4_2.4Mb
21	3326401	8.976	9	RNA45S4_2.4Mb
21	3329701	8.9	9	RNA45S4_2.4Mb
21	3333001	8.642	9	RNA45S4_2.4Mb
21	3336301	8.173	9	RNA45S4_2.4Mb
21	3359401	7.627	9	RNA45S4_2.4Mb
21	3362701	8.424	9	RNA45S4_2.4Mb
21	3366001	8.83	9	RNA45S4_2.4Mb
21	3369301	9.07	9	RNA45S4_2.4Mb
21	3372601	8.873	9	RNA45S4_2.4Mb
21	3375901	8.7	9	RNA45S4_2.4Mb
21	3379201	8.636	9	RNA45S4_2.4Mb
21	3382501	7.685	9	RNA45S4_2.4Mb
21	3405601	7.988	9	RNA45S4_2.4Mb
21	3408901	8.682	9	RNA45S4_2.4Mb
21	3412201	8.912	9	RNA45S4_2.4Mb
21	3415501	9.027	9	RNA45S4_2.4Mb
21	3418801	8.933	9	RNA45S4_2.4Mb
21	3422101	8.576	9	RNA45S4_2.4Mb
21	3425401	8.267	9	RNA45S4_2.4Mb
21	3428701	7.094	9	RNA45S4_2.4Mb
21	3448501	7.382	9	RNA45S4_2.4Mb
21	3451801	8.303	9	RNA45S4_2.4Mb
21	3455101	8.812	9	RNA45S4_2.4Mb
21	3458401	9.094	9	RNA45S4_2.4Mb
21	3461701	8.915	9	RNA45S4_2.4Mb
21	3465001	8.764	9	RNA45S4_2.4Mb
21	3468301	8.7	9	RNA45S4_2.4Mb
21	3471601	7.812	9	RNA45S4_2.4Mb
21	3494701	7.818	9	RNA45S4_2.4Mb
21	3498001	8.642	9	RNA45S4_2.4Mb
21	3501301	8.885	9	RNA45S4_2.4Mb
21	3504601	9.064	9	RNA45S4_2.4Mb
21	3507901	8.927	9	RNA45S4_2.4Mb
21	3511201	8.579	9	RNA45S4_2.4Mb
21	3514501	8.464	9	RNA45S4_2.4Mb
21	3517801	7.3	9	RNA45S4_2.4Mb
21	3537601	7.212	9	RNA45S4_2.4Mb
21	3540901	8.306	9	RNA45S4_2.4Mb
21	3544201	8.827	9	RNA45S4_2.4Mb
21	3547501	9.073	9	RNA45S4_2.4Mb
21	3550801	8.958	9	RNA45S4_2.4Mb
21	3554101	8.842	9	RNA45S4_2.4Mb
21	3557401	8.676	9	RNA45S4_2.4Mb
21	3560701	8.003	9	RNA45S4_2.4Mb
21	3583801	7.727	9	RNA45S4_2.4Mb
21	3587101	8.588	9	RNA45S4_2.4Mb
21	3590401	8.818	9	RNA45S4_2.4Mb
21	3593701	9.082	9	RNA45S4_2.4Mb
21	3597001	8.927	9	RNA45S4_2.4Mb
21	3600301	8.633	9	RNA45S4_2.4Mb
21	3603601	8.594	9	RNA45S4_2.4Mb
21	3606901	7.518	9	RNA45S4_2.4Mb
21	3626701	7.055	9	RNA45S4_2.4Mb
21	3630001	8.148	9	RNA45S4_2.4Mb
21	3633301	8.727	9	RNA45S4_2.4Mb
21	3636601	9.015	9	RNA45S4_2.4Mb
21	3639901	8.976	9	RNA45S4_2.4Mb
21	3643201	8.903	9	RNA45S4_2.4Mb
21	3646501	8.642	9	RNA45S4_2.4Mb
21	3649801	8.176	9	RNA45S4_2.4Mb
21	3672901	7.621	9	RNA45S4_2.4Mb
21	3676201	8.424	9	RNA45S4_2.4Mb
21	3679501	8.827	9	RNA45S4_2.4Mb
21	3682801	9.073	9	RNA45S4_2.4Mb
21	3686101	8.873	9	RNA45S4_2.4Mb
21	3689401	8.7	9	RNA45S4_2.4Mb
21	3692701	8.636	9	RNA45S4_2.4Mb
21	3696001	7.691	9	RNA45S4_2.4Mb
21	3719101	7.979	9	RNA45S4_2.4Mb
21	3722401	8.682	9	RNA45S4_2.4Mb
21	3725701	8.912	9	RNA45S4_2.4Mb
21	3729001	9.03	9	RNA45S4_2.4Mb
21	3732301	8.93	9	RNA45S4_2.4Mb
21	3735601	8.573	9	RNA45S4_2.4Mb
21	3738901	8.267	9	RNA45S4_2.4Mb
21	3742201	7.094	9	RNA45S4_2.4Mb
21	3762001	7.379	9	RNA45S4_2.4Mb
21	3765301	8.3	9	RNA45S4_2.4Mb
21	3768601	8.812	9	RNA45S4_2.4Mb
21	3771901	9.097	9	RNA45S4_2.4Mb
21	3775201	8.915	9	RNA45S4_2.4Mb
21	3778501	8.764	9	RNA45S4_2.4Mb
21	3781801	8.7	9	RNA45S4_2.4Mb
21	3785101	7.815	9	RNA45S4_2.4Mb
21	3808201	7.818	9	RNA45S4_2.4Mb
21	3811501	8.642	9	RNA45S4_2.4Mb
21	3814801	8.885	9	RNA45S4_2.4Mb
21	3818101	9.061	9	RNA45S4_2.4Mb
21	3821401	8.927	9	RNA45S4_2.4Mb
21	3824701	8.582	9	RNA45S4_2.4Mb
21	3828001	8.47	9	RNA45S4_2.4Mb
21	3831301	7.306	9	RNA45S4_2.4Mb
21	3851101	7.182	9	RNA45S4_2.4Mb
21	3854401	8.3	9	RNA45S4_2.4Mb
21	3857701	8.809	9	RNA45S4_2.4Mb
21	3861001	9.064	9	RNA45S4_2.4Mb
21	3864301	8.945	9	RNA45S4_2.4Mb
21	3867601	8.83	9	RNA45S4_2.4Mb
21	3870901	8.697	9	RNA45S4_2.4Mb
21	3874201	8.003	9	RNA45S4_2.4Mb
21	3897301	7.782	9	RNA45S4_2.4Mb
21	3900601	8.612	9	RNA45S4_2.4Mb
21	3903901	8.867	9	RNA45S4_2.4Mb
21	3907201	9.064	9	RNA45S4_2.4Mb
21	3910501	8.939	9	RNA45S4_2.4Mb
21	3913801	8.606	9	RNA45S4_2.4Mb
21	3917101	8.488	9	RNA45S4_2.4Mb
21	3920401	7.37	9	RNA45S4_2.4Mb
21	3940201	7.276	9	RNA45S4_2.4Mb
21	3943501	8.306	9	RNA45S4_2.4Mb
21	3946801	8.8	9	RNA45S4_2.4Mb
21	3950101	9.085	9	RNA45S4_2.4Mb
21	3953401	8.912	9	RNA45S4_2.4Mb
21	3956701	8.788	9	RNA45S4_2.4Mb
21	3960001	8.727	9	RNA45S4_2.4Mb
21	3963301	7.885	9	RNA45S4_2.4Mb
21	3986401	7.87	9	RNA45S4_2.4Mb
21	3989701	8.639	9	RNA45S4_2.4Mb
21	3993001	8.858	9	RNA45S4_2.4Mb
21	3996301	9.039	9	RNA45S4_2.4Mb
21	3999601	8.933	9	RNA45S4_2.4Mb
21	4002901	8.624	9	RNA45S4_2.4Mb
21	4006201	8.379	9	RNA45S4_2.4Mb
21	4009501	7.215	9	RNA45S4_2.4Mb
21	4029301	7.43	9	RNA45S4_2.4Mb
21	4032601	8.382	9	RNA45S4_2.4Mb
21	4035901	8.794	9	RNA45S4_2.4Mb
21	4039201	9.064	9	RNA45S4_2.4Mb
21	4042501	8.888	9	RNA45S4_2.4Mb
21	4045801	8.724	9	RNA45S4_2.4Mb
21	4049101	8.661	9	RNA45S4_2.4Mb
21	4052401	7.776	9	RNA45S4_2.4Mb
21	4075501	8.027	9	RNA45S4_2.4Mb
21	4078801	8.67	9	RNA45S4_2.4Mb
21	4082101	8.921	9	RNA45S4_2.4Mb
21	4085401	9.003	9	RNA45S4_2.4Mb
21	4088701	8.921	9	RNA45S4_2.4Mb
21	4092001	8.639	9	RNA45S4_2.4Mb
21	4095301	8.318	9	RNA45S4_2.4Mb
21	4098601	7.067	9	RNA45S4_2.4Mb
21	4118401	7.612	9	RNA45S4_2.4Mb
21	4121701	8.4	9	RNA45S4_2.4Mb
21	4125001	8.815	9	RNA45S4_2.4Mb
21	4128301	9.061	9	RNA45S4_2.4Mb
21	4131601	8.888	9	RNA45S4_2.4Mb
21	4134901	8.676	9	RNA45S4_2.4Mb
21	4138201	8.609	9	RNA45S4_2.4Mb
21	4141501	7.706	9	RNA45S4_2.4Mb
21	4161301	7.055	9	RNA45S4_2.4Mb
21	4164601	8.155	9	RNA45S4_2.4Mb
21	4167901	8.7	9	RNA45S4_2.4Mb
21	4171201	9.006	9	RNA45S4_2.4Mb
21	4174501	8.97	9	RNA45S4_2.4Mb
21	4177801	8.894	9	RNA45S4_2.4Mb
21	4181101	8.673	9	RNA45S4_2.4Mb
21	4184401	8.212	9	RNA45S4_2.4Mb
21	4207501	7.661	9	RNA45S4_2.4Mb
21	4210801	8.506	9	RNA45S4_2.4Mb
21	4214101	8.806	9	RNA45S4_2.4Mb
21	4217401	9.07	9	RNA45S4_2.4Mb
21	4220701	8.921	9	RNA45S4_2.4Mb
21	4224001	8.636	9	RNA45S4_2.4Mb
21	4227301	8.591	9	RNA45S4_2.4Mb
21	4230601	7.555	9	RNA45S4_2.4Mb
21	4250401	7.115	9	RNA45S4_2.4Mb
21	4253701	8.27	9	RNA45S4_2.4Mb
21	4257001	8.755	9	RNA45S4_2.4Mb
21	4260301	9.055	9	RNA45S4_2.4Mb
21	4263601	8.955	9	RNA45S4_2.4Mb
21	4266901	8.845	9	RNA45S4_2.4Mb
21	4270201	8.691	9	RNA45S4_2.4Mb
21	4273501	8.076	9	RNA45S4_2.4Mb
21	4296601	7.758	9	RNA45S4_2.4Mb
21	4299901	8.579	9	RNA45S4_2.4Mb
21	4303201	8.827	9	RNA45S4_2.4Mb
21	4306501	9.061	9	RNA45S4_2.4Mb
21	4309801	8.912	9	RNA45S4_2.4Mb
21	4313101	8.585	9	RNA45S4_2.4Mb
21	4316401	8.524	9	RNA45S4_2.4Mb
21	4319701	7.445	9	RNA45S4_2.4Mb
21	4339501	7.203	9	RNA45S4_2.4Mb
21	4342801	8.324	9	RNA45S4_2.4Mb
21	4346101	8.821	9	RNA45S4_2.4Mb
21	4349401	9.085	9	RNA45S4_2.4Mb
21	4352701	8.921	9	RNA45S4_2.4Mb
21	4356001	8.803	9	RNA45S4_2.4Mb
21	4359301	8.727	9	RNA45S4_2.4Mb
21	4362601	7.952	9	RNA45S4_2.4Mb
21	4385701	7.8	9	RNA45S4_2.4Mb
21	4389001	8.624	9	RNA45S4_2.4Mb
21	4392301	8.855	9	RNA45S4_2.4Mb
21	4395601	9.048	9	RNA45S4_2.4Mb
21	4398901	8.945	9	RNA45S4_2.4Mb
21	4402201	8.615	9	RNA45S4_2.4Mb
21	4405501	8.433	9	RNA45S4_2.4Mb
21	4408801	7.285	9	RNA45S4_2.4Mb
21	4428601	7.345	9	RNA45S4_2.4Mb
21	4431901	8.306	9	RNA45S4_2.4Mb
21	4435201	8.788	9	RNA45S4_2.4Mb
21	4438501	9.088	9	RNA45S4_2.4Mb
21	4441801	8.9	9	RNA45S4_2.4Mb
21	4445101	8.745	9	RNA45S4_2.4Mb
21	4448401	8.694	9	RNA45S4_2.4Mb
21	4451701	7.812	9	RNA45S4_2.4Mb
21	4474801	7.948	9	RNA45S4_2.4Mb
21	4478101	8.658	9	RNA45S4_2.4Mb
21	4481401	8.888	9	RNA45S4_2.4Mb
21	4484701	9.033	9	RNA45S4_2.4Mb
21	4488001	8.942	9	RNA45S4_2.4Mb
21	4491301	8.633	9	RNA45S4_2.4Mb
21	4494601	8.333	9	RNA45S4_2.4Mb
21	4497901	7.139	9	RNA45S4_2.4Mb
21	4517701	7.533	9	RNA45S4_2.4Mb
21	4521001	8.397	9	RNA45S4_2.4Mb
21	4524301	8.797	9	RNA45S4_2.4Mb
21	4527601	9.07	9	RNA45S4_2.4Mb
21	4530901	8.879	9	RNA45S4_2.4Mb
21	4534201	8.7	9	RNA45S4_2.4Mb
21	4537501	8.636	9	RNA45S4_2.4Mb
21	4540801	7.767	9	RNA45S4_2.4Mb
21	4560601	7	9	RNA45S4_2.4Mb
21	4563901	8.1	9	RNA45S4_2.4Mb
21	4567201	8.691	9	RNA45S4_2.4Mb
21	4570501	8.967	9	RNA45S4_2.4Mb
21	4573801	8.97	9	RNA45S4_2.4Mb
21	4577101	8.894	9	RNA45S4_2.4Mb
21	4580401	8.655	9	RNA45S4_2.4Mb
21	4583701	8.273	9	RNA45S4_2.4Mb
21	4606801	7.636	9	RNA45S4_2.4Mb
21	4610101	8.427	9	RNA45S4_2.4Mb
21	4613401	8.815	9	RNA45S4_2.4Mb
21	4616701	9.052	9	RNA45S4_2.4Mb
21	4620001	8.921	9	RNA45S4_2.4Mb
21	4623301	8.655	9	RNA45S4_2.4Mb
21	4626601	8.597	9	RNA45S4_2.4Mb
21	4629901	7.621	9	RNA45S4_2.4Mb
21	4649701	7.106	9	RNA45S4_2.4Mb
21	4653001	8.203	9	RNA45S4_2.4Mb
21	4656301	8.724	9	RNA45S4_2.4Mb
21	4659601	9.018	9	RNA45S4_2.4Mb
21	4662901	8.961	9	RNA45S4_2.4Mb
21	4666201	8.87	9	RNA45S4_2.4Mb
21	4669501	8.679	9	RNA45S4_2.4Mb
21	4672801	8.148	9	RNA45S4_2.4Mb
21	4695901	7.736	9	RNA45S4_2.4Mb
21	4699201	8.576	9	RNA45S4_2.4Mb
21	4702501	8.797	9	RNA45S4_2.4Mb
21	4705801	9.076	9	RNA45S4_2.4Mb
21	4709101	8.921	9	RNA45S4_2.4Mb
21	4712401	8.603	9	RNA45S4_2.4Mb
21	4715701	8.576	9	RNA45S4_2.4Mb
21	4719001	7.497	9	RNA45S4_2.4Mb
21	4738801	7.155	9	RNA45S4_2.4Mb
21	4742101	8.321	9	RNA45S4_2.4Mb
21	4745401	8.8	9	RNA45S4_2.4Mb
21	4748701	9.064	9	RNA45S4_2.4Mb
21	4752001	8.945	9	RNA45S4_2.4Mb
21	4755301	8.83	9	RNA45S4_2.4Mb
21	4758601	8.697	9	RNA45S4_2.4Mb
21	4761901	8.003	9	RNA45S4_2.4Mb
21	4785001	7.782	9	RNA45S4_2.4Mb
21	4788301	8.612	9	RNA45S4_2.4Mb
21	4791601	8.867	9	RNA45S4_2.4Mb
21	4794901	9.064	9	RNA45S4_2.4Mb
21	4798201	8.939	9	RNA45S4_2.4Mb
21	4801501	8.606	9	RNA45S4_2.4Mb
21	4804801	8.488	9	RNA45S4_2.4Mb
21	4808101	7.37	9	RNA45S4_2.4Mb
21	4827901	7.276	9	RNA45S4_2.4Mb
21	4831201	8.306	9	RNA45S4_2.4Mb
21	4834501	8.8	9	RNA45S4_2.4Mb
21	4837801	9.085	9	RNA45S4_2.4Mb
21	4841101	8.912	9	RNA45S4_2.4Mb
21	4844401	8.788	9	RNA45S4_2.4Mb
21	4847701	8.727	9	RNA45S4_2.4Mb
21	4851001	7.885	9	RNA45S4_2.4Mb
21	4874101	7.87	9	RNA45S4_2.4Mb
21	4877401	8.639	9	RNA45S4_2.4Mb
21	4880701	8.858	9	RNA45S4_2.4Mb
21	4884001	9.039	9	RNA45S4_2.4Mb
21	4887301	8.933	9	RNA45S4_2.4Mb
21	4890601	8.624	9	RNA45S4_2.4Mb
21	4893901	8.379	9	RNA45S4_2.4Mb
21	4897201	7.215	9	RNA45S4_2.4Mb
21	4917001	7.43	9	RNA45S4_2.4Mb
21	4920301	8.382	9	RNA45S4_2.4Mb
21	4923601	8.794	9	RNA45S4_2.4Mb
21	4926901	9.064	9	RNA45S4_2.4Mb
21	4930201	8.888	9	RNA45S4_2.4Mb
21	4933501	8.724	9	RNA45S4_2.4Mb
21	4936801	8.661	9	RNA45S4_2.4Mb
21	4940101	7.776	9	RNA45S4_2.4Mb
21	4963201	8.027	9	RNA45S4_2.4Mb
21	4966501	8.67	9	RNA45S4_2.4Mb
21	4969801	8.921	9	RNA45S4_2.4Mb
21	4973101	9.003	9	RNA45S4_2.4Mb
21	4976401	8.921	9	RNA45S4_2.4Mb
21	4979701	8.639	9	RNA45S4_2.4Mb
21	4983001	8.318	9	RNA45S4_2.4Mb
21	4986301	7.067	9	RNA45S4_2.4Mb
21	5006101	7.612	9	RNA45S4_2.4Mb
21	5009401	8.4	9	RNA45S4_2.4Mb
21	5012701	8.815	9	RNA45S4_2.4Mb
21	5016001	9.061	9	RNA45S4_2.4Mb
21	5019301	8.888	9	RNA45S4_2.4Mb
21	5022601	8.676	9	RNA45S4_2.4Mb
21	5025901	8.609	9	RNA45S4_2.4Mb
21	5029201	7.706	9	RNA45S4_2.4Mb
21	5049001	7.055	9	RNA45S4_2.4Mb
21	5052301	8.155	9	RNA45S4_2.4Mb
21	5055601	8.7	9	RNA45S4_2.4Mb
21	5058901	9.006	9	RNA45S4_2.4Mb
21	5062201	8.97	9	RNA45S4_2.4Mb
21	5065501	8.894	9	RNA45S4_2.4Mb
21	5068801	8.673	9	RNA45S4_2.4Mb
21	5072101	8.212	9	RNA45S4_2.4Mb
21	5095201	7.661	9	RNA45S4_2.4Mb
21	5098501	8.506	9	RNA45S4_2.4Mb
21	5101801	8.806	9	RNA45S4_2.4Mb
21	5105101	9.07	9	RNA45S4_2.4Mb
21	5108401	8.921	9	RNA45S4_2.4Mb
21	5111701	8.636	9	RNA45S4_2.4Mb
21	5115001	8.591	9	RNA45S4_2.4Mb
21	5118301	7.555	9	RNA45S4_2.4Mb
21	5138101	7.115	9	RNA45S4_2.4Mb
21	5141401	8.27	9	RNA45S4_2.4Mb
21	5144701	8.755	9	RNA45S4_2.4Mb
21	5148001	9.055	9	RNA45S4_2.4Mb
21	5151301	8.955	9	RNA45S4_2.4Mb
21	5154601	8.845	9	RNA45S4_2.4Mb
21	5157901	8.691	9	RNA45S4_2.4Mb
21	5161201	8.076	9	RNA45S4_2.4Mb
21	5184301	7.758	9	RNA45S4_2.4Mb
21	5187601	8.579	9	RNA45S4_2.4Mb
21	5190901	8.827	9	RNA45S4_2.4Mb
21	5194201	9.061	9	RNA45S4_2.4Mb
21	5197501	8.912	9	RNA45S4_2.4Mb
21	5200801	8.585	9	RNA45S4_2.4Mb
21	5204101	8.524	9	RNA45S4_2.4Mb
21	5207401	7.445	9	RNA45S4_2.4Mb
21	5227201	7.203	9	RNA45S4_2.4Mb
21	5230501	8.324	9	RNA45S4_2.4Mb
21	5233801	8.821	9	RNA45S4_2.4Mb
21	5237101	9.085	9	RNA45S4_2.4Mb
21	5240401	8.921	9	RNA45S4_2.4Mb
21	5243701	8.803	9	RNA45S4_2.4Mb
21	5247001	8.727	9	RNA45S4_2.4Mb
21	5250301	7.952	9	RNA45S4_2.4Mb
21	5273401	7.8	9	RNA45S4_2.4Mb
21	5276701	8.624	9	RNA45S4_2.4Mb
21	5280001	8.855	9	RNA45S4_2.4Mb
21	5283301	9.048	9	RNA45S4_2.4Mb
21	5286601	8.945	9	RNA45S4_2.4Mb
21	5289901	8.615	9	RNA45S4_2.4Mb
21	5293201	8.433	9	RNA45S4_2.4Mb
21	5296501	7.285	9	RNA45S4_2.4Mb
21	5316301	7.345	9	RNA45S4_2.4Mb
21	5319601	8.306	9	RNA45S4_2.4Mb
21	5322901	8.788	9	RNA45S4_2.4Mb
21	5326201	9.088	9	RNA45S4_2.4Mb
21	5329501	8.9	9	RNA45S4_2.4Mb
21	5332801	8.745	9	RNA45S4_2.4Mb
21	5336101	8.694	9	RNA45S4_2.4Mb
21	5339401	7.812	9	RNA45S4_2.4Mb
21	5362501	7.948	9	RNA45S4_2.4Mb
21	5365801	8.658	9	RNA45S4_2.4Mb
21	5369101	8.888	9	RNA45S4_2.4Mb
21	5372401	9.033	9	RNA45S4_2.4Mb
21	5375701	8.942	9	RNA45S4_2.4Mb
21	5379001	8.633	9	RNA45S4_2.4Mb
21	5382301	8.333	9	RNA45S4_2.4Mb
21	5385601	7.139	9	RNA45S4_2.4Mb
21	5405401	7.533	9	RNA45S4_2.4Mb
21	5408701	8.397	9	RNA45S4_2.4Mb
21	5412001	8.797	9	RNA45S4_2.4Mb
21	5415301	9.07	9	RNA45S4_2.4Mb
21	5418601	8.879	9	RNA45S4_2.4Mb
21	5421901	8.7	9	RNA45S4_2.4Mb
21	5425201	8.636	9	RNA45S4_2.4Mb
21	5428501	7.767	9	RNA45S4_2.4Mb
21	5448301	7	9	RNA45S4_2.4Mb
21	5451601	8.1	9	RNA45S4_2.4Mb
21	5454901	8.691	9	RNA45S4_2.4Mb
21	5458201	8.967	9	RNA45S4_2.4Mb
21	5461501	8.97	9	RNA45S4_2.4Mb
21	5464801	8.894	9	RNA45S4_2.4Mb
21	5468101	8.655	9	RNA45S4_2.4Mb
21	5471401	8.273	9	RNA45S4_2.4Mb
21	5494501	7.639	9	RNA45S4_2.4Mb
21	5497801	8.412	9	RNA45S4_2.4Mb
21	5501101	8.767	9	RNA45S4_2.4Mb
21	5504401	8.885	9	RNA45S4_2.4Mb
21	5507701	8.785	9	RNA45S4_2.4Mb
21	5511001	8.455	9	RNA45S4_2.4Mb
21	5514301	8.418	9	RNA45S4_2.4Mb
21	5517601	7.455	9	RNA45S4_2.4Mb
21	5537401	7.209	9	RNA45S4_2.4Mb
21	5540701	8.315	9	RNA45S4_2.4Mb
21	5544001	8.845	9	RNA45S4_2.4Mb
21	5547301	9.082	9	RNA45S4_2.4Mb
21	5550601	8.961	9	RNA45S4_2.4Mb
21	5553901	8.836	9	RNA45S4_2.4Mb
21	5557201	8.667	9	RNA45S4_2.4Mb
21	5560501	7.852	9	RNA45S4_2.4Mb
22	4778401	7.664	10	RNA45S5-1_0.9Mb
22	4781701	8.07	10	RNA45S5-1_0.9Mb
22	4785001	8.548	10	RNA45S5-1_0.9Mb
22	4788301	8.424	10	RNA45S5-1_0.9Mb
22	4791601	8.297	10	RNA45S5-1_0.9Mb
22	4794901	8.388	10	RNA45S5-1_0.9Mb
22	4798201	7.806	10	RNA45S5-1_0.9Mb
22	4821301	8.109	10	RNA45S5-1_0.9Mb
22	4824601	8.579	10	RNA45S5-1_0.9Mb
22	4827901	8.8	10	RNA45S5-1_0.9Mb
22	4831201	8.618	10	RNA45S5-1_0.9Mb
22	4834501	8.539	10	RNA45S5-1_0.9Mb
22	4837801	8.433	10	RNA45S5-1_0.9Mb
22	4841101	7.967	10	RNA45S5-1_0.9Mb
22	4864201	7.952	10	RNA45S5-1_0.9Mb
22	4867501	8.482	10	RNA45S5-1_0.9Mb
22	4870801	8.752	10	RNA45S5-1_0.9Mb
22	4874101	8.679	10	RNA45S5-1_0.9Mb
22	4877401	8.612	10	RNA45S5-1_0.9Mb
22	4880701	8.427	10	RNA45S5-1_0.9Mb
22	4884001	8.127	10	RNA45S5-1_0.9Mb
22	4907101	7.815	10	RNA45S5-1_0.9Mb
22	4910401	8.424	10	RNA45S5-1_0.9Mb
22	4913701	8.739	10	RNA45S5-1_0.9Mb
22	4917001	8.706	10	RNA45S5-1_0.9Mb
22	4920301	8.673	10	RNA45S5-1_0.9Mb
22	4923601	8.4	10	RNA45S5-1_0.9Mb
22	4926901	8.288	10	RNA45S5-1_0.9Mb
22	4930201	7.136	10	RNA45S5-1_0.9Mb
22	4950001	7.697	10	RNA45S5-1_0.9Mb
22	4953301	8.345	10	RNA45S5-1_0.9Mb
22	4956601	8.739	10	RNA45S5-1_0.9Mb
22	4959901	8.733	10	RNA45S5-1_0.9Mb
22	4963201	8.715	10	RNA45S5-1_0.9Mb
22	4966501	8.4	10	RNA45S5-1_0.9Mb
22	4969801	8.312	10	RNA45S5-1_0.9Mb
22	4973101	7.309	10	RNA45S5-1_0.9Mb
22	4992901	7.558	10	RNA45S5-1_0.9Mb
22	4996201	8.306	10	RNA45S5-1_0.9Mb
22	4999501	8.697	10	RNA45S5-1_0.9Mb
22	5002801	8.821	10	RNA45S5-1_0.9Mb
22	5006101	8.706	10	RNA45S5-1_0.9Mb
22	5009401	8.361	10	RNA45S5-1_0.9Mb
22	5012701	8.303	10	RNA45S5-1_0.9Mb
22	5016001	7.497	10	RNA45S5-1_0.9Mb
22	5035801	7.309	10	RNA45S5-1_0.9Mb
22	5039101	8.318	10	RNA45S5-1_0.9Mb
22	5042401	8.748	10	RNA45S5-1_0.9Mb
22	5045701	8.87	10	RNA45S5-1_0.9Mb
22	5049001	8.667	10	RNA45S5-1_0.9Mb
22	5052301	8.43	10	RNA45S5-1_0.9Mb
22	5055601	8.376	10	RNA45S5-1_0.9Mb
22	5058901	7.633	10	RNA45S5-1_0.9Mb
22	5078701	7.158	10	RNA45S5-1_0.9Mb
22	5082001	8.291	10	RNA45S5-1_0.9Mb
22	5085301	8.642	10	RNA45S5-1_0.9Mb
22	5088601	8.867	10	RNA45S5-1_0.9Mb
22	5091901	8.661	10	RNA45S5-1_0.9Mb
22	5095201	8.497	10	RNA45S5-1_0.9Mb
22	5098501	8.391	10	RNA45S5-1_0.9Mb
22	5101801	7.818	10	RNA45S5-1_0.9Mb
22	5124901	8.097	10	RNA45S5-1_0.9Mb
22	5128201	8.567	10	RNA45S5-1_0.9Mb
22	5131501	8.791	10	RNA45S5-1_0.9Mb
22	5134801	8.621	10	RNA45S5-1_0.9Mb
22	5138101	8.542	10	RNA45S5-1_0.9Mb
22	5141401	8.433	10	RNA45S5-1_0.9Mb
22	5144701	7.979	10	RNA45S5-1_0.9Mb
22	5167801	7.939	10	RNA45S5-1_0.9Mb
22	5171101	8.482	10	RNA45S5-1_0.9Mb
22	5174401	8.745	10	RNA45S5-1_0.9Mb
22	5177701	8.679	10	RNA45S5-1_0.9Mb
22	5181001	8.618	10	RNA45S5-1_0.9Mb
22	5184301	8.418	10	RNA45S5-1_0.9Mb
22	5187601	8.142	10	RNA45S5-1_0.9Mb
22	5210701	7.815	10	RNA45S5-1_0.9Mb
22	5214001	8.415	10	RNA45S5-1_0.9Mb
22	5217301	8.742	10	RNA45S5-1_0.9Mb
22	5220601	8.706	10	RNA45S5-1_0.9Mb
22	5223901	8.676	10	RNA45S5-1_0.9Mb
22	5227201	8.406	10	RNA45S5-1_0.9Mb
22	5230501	8.294	10	RNA45S5-1_0.9Mb
22	5233801	7.148	10	RNA45S5-1_0.9Mb
22	5253601	7.697	10	RNA45S5-1_0.9Mb
22	5256901	8.345	10	RNA45S5-1_0.9Mb
22	5260201	8.733	10	RNA45S5-1_0.9Mb
22	5263501	8.739	10	RNA45S5-1_0.9Mb
22	5266801	8.715	10	RNA45S5-1_0.9Mb
22	5270101	8.403	10	RNA45S5-1_0.9Mb
22	5273401	8.312	10	RNA45S5-1_0.9Mb
22	5276701	7.327	10	RNA45S5-1_0.9Mb
22	5296501	7.542	10	RNA45S5-1_0.9Mb
22	5299801	8.3	10	RNA45S5-1_0.9Mb
22	5303101	8.694	10	RNA45S5-1_0.9Mb
22	5306401	8.824	10	RNA45S5-1_0.9Mb
22	5309701	8.703	10	RNA45S5-1_0.9Mb
22	5313001	8.361	10	RNA45S5-1_0.9Mb
22	5316301	8.306	10	RNA45S5-1_0.9Mb
22	5319601	7.506	10	RNA45S5-1_0.9Mb
22	5339401	7.294	10	RNA45S5-1_0.9Mb
22	5342701	8.312	10	RNA45S5-1_0.9Mb
22	5346001	8.733	10	RNA45S5-1_0.9Mb
22	5349301	8.873	10	RNA45S5-1_0.9Mb
22	5352601	8.661	10	RNA45S5-1_0.9Mb
22	5355901	8.436	10	RNA45S5-1_0.9Mb
22	5359201	8.376	10	RNA45S5-1_0.9Mb
22	5362501	7.652	10	RNA45S5-1_0.9Mb
22	5382301	7.142	10	RNA45S5-1_0.9Mb
22	5385601	8.279	10	RNA45S5-1_0.9Mb
22	5388901	8.636	10	RNA45S5-1_0.9Mb
22	5392201	8.858	10	RNA45S5-1_0.9Mb
22	5395501	8.661	10	RNA45S5-1_0.9Mb
22	5398801	8.5	10	RNA45S5-1_0.9Mb
22	5402101	8.391	10	RNA45S5-1_0.9Mb
22	5405401	7.821	10	RNA45S5-1_0.9Mb
22	5425201	7.003	10	RNA45S5-1_0.9Mb
22	5428501	8.088	10	RNA45S5-1_0.9Mb
22	5431801	8.561	10	RNA45S5-1_0.9Mb
22	5435101	8.785	10	RNA45S5-1_0.9Mb
22	5438401	8.63	10	RNA45S5-1_0.9Mb
22	5441701	8.552	10	RNA45S5-1_0.9Mb
22	5445001	8.433	10	RNA45S5-1_0.9Mb
22	5448301	7.988	10	RNA45S5-1_0.9Mb
22	5471401	7.912	10	RNA45S5-1_0.9Mb
22	5474701	8.482	10	RNA45S5-1_0.9Mb
22	5478001	8.742	10	RNA45S5-1_0.9Mb
22	5481301	8.682	10	RNA45S5-1_0.9Mb
22	5484601	8.618	10	RNA45S5-1_0.9Mb
22	5487901	8.421	10	RNA45S5-1_0.9Mb
22	5491201	8.155	10	RNA45S5-1_0.9Mb
22	5514301	7.815	10	RNA45S5-1_0.9Mb
22	5517601	8.521	10	RNA45S5-1_0.9Mb
22	5520901	8.794	10	RNA45S5-1_0.9Mb
22	5524201	8.897	10	RNA45S5-1_0.9Mb
22	5527501	8.858	10	RNA45S5-1_0.9Mb
22	5530801	8.482	10	RNA45S5-1_0.9Mb
22	5534101	8.391	10	RNA45S5-1_0.9Mb
22	5537401	7.288	10	RNA45S5-1_0.9Mb
22	5557201	7.394	10	RNA45S5-1_0.9Mb
22	5560501	8.288	10	RNA45S5-1_0.9Mb
22	5563801	8.736	10	RNA45S5-1_0.9Mb
22	5567101	8.833	10	RNA45S5-1_0.9Mb
22	5570401	8.682	10	RNA45S5-1_0.9Mb
22	5573701	8.397	10	RNA45S5-1_0.9Mb
22	5577001	8.327	10	RNA45S5-1_0.9Mb
22	5580301	7.452	10	RNA45S5-1_0.9Mb
22	5603401	7.742	10	RNA45S5-1_0.9Mb
22	5606701	8.555	10	RNA45S5-1_0.9Mb
22	5610001	8.842	10	RNA45S5-1_0.9Mb
22	5613301	8.876	10	RNA45S5-1_0.9Mb
22	5616601	8.812	10	RNA45S5-1_0.9Mb
22	5619901	8.364	10	RNA45S5-1_0.9Mb
22	5623201	8.161	10	RNA45S5-1_0.9Mb
22	5646301	7.103	10	RNA45S5-1_0.9Mb
22	5649601	8.097	10	RNA45S5-1_0.9Mb
22	5652901	8.685	10	RNA45S5-1_0.9Mb
22	5656201	8.952	10	RNA45S5-1_0.9Mb
22	5659501	8.791	10	RNA45S5-1_0.9Mb
22	5662801	8.697	10	RNA45S5-1_0.9Mb
22	5666101	8.367	10	RNA45S5-1_0.9Mb
22	5669401	7.839	10	RNA45S5-1_0.9Mb

## Sheet: Table_S7
Supplemental Table S7: Cas9 guide RNA sequences used in this study.
Design ID	Sequence	PAM	Chromosome	Strand	Start*	End
pLAM
CD.Cas9.CYQL7656.AB	AAATCTTCTATAGGATCCAC	AGG	chr4	-	193543638	193543657
CD.Cas9.CYQL7656.AG	TAGACAGCGTCGGAAGGTGG	GGG	chr4	-	193543549	193543568
CD.Cas9.CYQL7656.AK	GAGCTCCCTTGCACGTCAGC	CGG	chr4	-	193543475	193543494
p13-E11
CD.Cas9.QJJG2210.AA	CCTATTAAACGTCACGGACA	AGG	chr4	+	193432979	193432998
CD.Cas9.QJJG2210.AB	TAAAGTGCATTCGAACTCAC	AGG	chr4	+	193433159	193433178
CD.Cas9.QJJG2210.AC	TTCTACTCTGCAATCCCCTA	AGG	chr4	+	193433112	193433131
D4Z4
CD.Cas9.YQFF3353.BE	TTCCTCCGGGACAAAAGACC	GGG	chr4	+	193434991	193435010
*Sequence coordinates from T2T CHM13v2.0 chr4

## Sheet: Table_S8
Supplemental Table S8: Sample information for Sequence Read Archive; Bioproject number: PRJNA940957
Subject ID	sample_name	library_ID	library	filename
P1	Run9_128022	nCATS_Run9_128022	Cas9 gRNA:p13E-11+pLAM; MinION R9.4.1 flowcell	Run9_128022_fast5.tgz
P2	Run1_125972	nCATS_Run1_125972	Cas9 gRNA:p13E-11+pLAM; MinION R9.4.1 flowcell	Run1_125972_fast5.tgz
P3	Run14_128674	nCATS_Run14_128674	Cas9 gRNA:p13E-11+pLAM; MinION R9.4.1 flowcell	Run14_128674_fast5.tgz
P4	Run16_128675	nCATS_Run16_128675	Cas9 gRNA:p13E-11+pLAM; MinION R9.4.1 flowcell	Run16_128675_fast5.tgz
P5	Run19_54738-126170	nCATS_Run19_54738-126170	Cas9 gRNA:p13E-11+pLAM; MinION R9.4.1 flowcell	Run19_54738-126170_fast5.tgz
P6	Run22_FSHD0014	nCATS_Run22_FSHD0014	Cas9 gRNA:p13E-11+pLAM; MinION R9.4.1 flowcell	Run22_FSHD0014_fast5.tgz
P7	Run28_FSHD20002	nCATS_Run28_FSHD20002	Cas9 gRNA:p13E-11+pLAM; MinION R9.4.1 flowcell	Run28_FSHD20002_fast5.tgz
P8	Run31_FSHD20001	nCATS_Run31_FSHD20001	Cas9 gRNA:p13E-11+pLAM; MinION R9.4.1 flowcell	Run31_FSHD20001_fast5.tgz
P2	Run2_125971	nCATS_Run2_125971	Cas9 gRNA:p13E-11; MinION R9.4.1 flowcell	Run2_125971_fast5.tgz
C1	Run73_127665	nCATS_Run73_127665	Cas9 gRNA:D4Z4; Flongle R9.4.1 flowcell	Run73_127665_fast5.tgz
C2	Run48fl_P1-1	nCATS_Run48fl_P1-1	Cas9 gRNA:D4Z4; Flongle R9.4.1 flowcell	Run48fl_P1-1_fast5.tgz
P9	Run60fl_127663A	nCATS_Run60fl_127663A	Cas9 gRNA:D4Z4; Flongle R9.4.1 flowcell	Run60fl_127663A_fast5.tgz
P10	Run62fl_127626A	nCATS_Run62fl_127626A	Cas9 gRNA:D4Z4; Flongle R9.4.1 flowcell	Run62fl_127626A_fast5.tgz
P1	Run67fl_128022	nCATS_Run67fl_128022	Cas9 gRNA:D4Z4; Flongle R9.4.1 flowcell; replicate=1	Run67fl_128022_fast5.tgz
P1	Run68fl_128022	nCATS_Run68fl_128022	Cas9 gRNA:D4Z4; Flongle R9.4.1 flowcell; replicate=2	Run68fl_128022_fast5.tgz
P9	Run65_127663A	nCATS_Run65_127663A	Cas9 gRNA:p13E-11+pLAM+D4Z4; MinION R9.4.1 flowcell	Run65_127663A_fast5.tgz
P10	Run66_127626A	nCATS_Run66_127626A	Cas9 gRNA:p13E-11+pLAM+D4Z4; MinION R9.4.1 flowcell	Run66_127626A_fast5.tgz
C3	Run292_128049A	nCATS_Run292_128049A	Cas9 gRNA:p13E-11+pLAM+D4Z4; MinION R10.4.1 flowcell	Run292_128049A_fast5.tgz
